# Supplementary material for: Investigation of antiglycation activity of isoprenaline
Source: Royal Society of Chemistry journal article supplement (doi:10.1039/c5ra01723h), 2015-01-01

Figure 1. (Supplementary) Representative Annotation of AGE modified peptide

Annotation of AGE modified peptide in comparison with control peptide

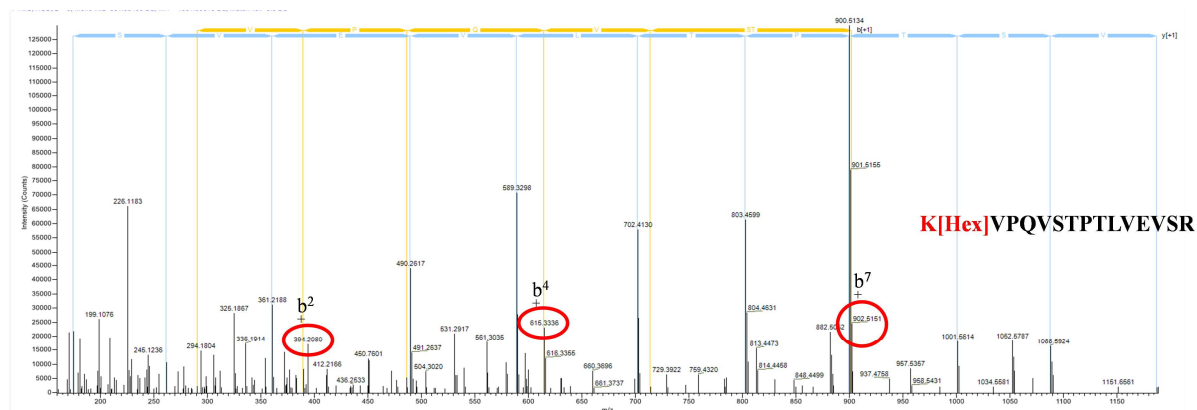

**K[Hex]VPQVSTPTLVEVSR**, K1-(162.0528 Da) Charge: +3, m/z: 601.33527 Da (+0.2 mmu/+0.33ppm), MH+: 1801.9912 Da.

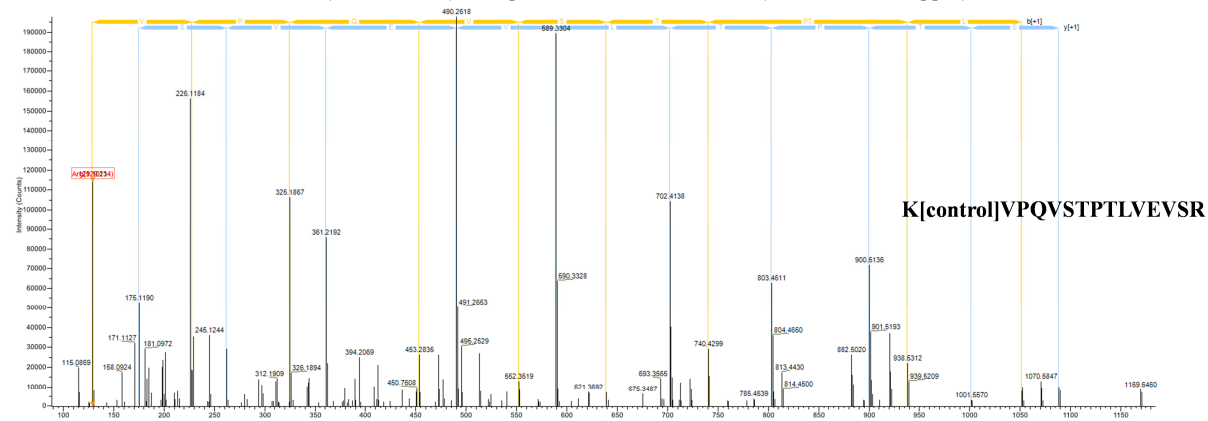

**KVPQVSTPTLVEVSR** Charge: +3, m/z: 547.31873 Da (+1.27 mmu/+2.32ppm), MH+: 1639.94162 Da

Figure 2. (Supplementary) Area under curve ratio of few modified to unmodified peptides in glycated BSA, glycated BSA in presence of isoprenaline (10mM) or aminoguanidine (10mM).

**Glycated modified peptides of BSA – XIC's**

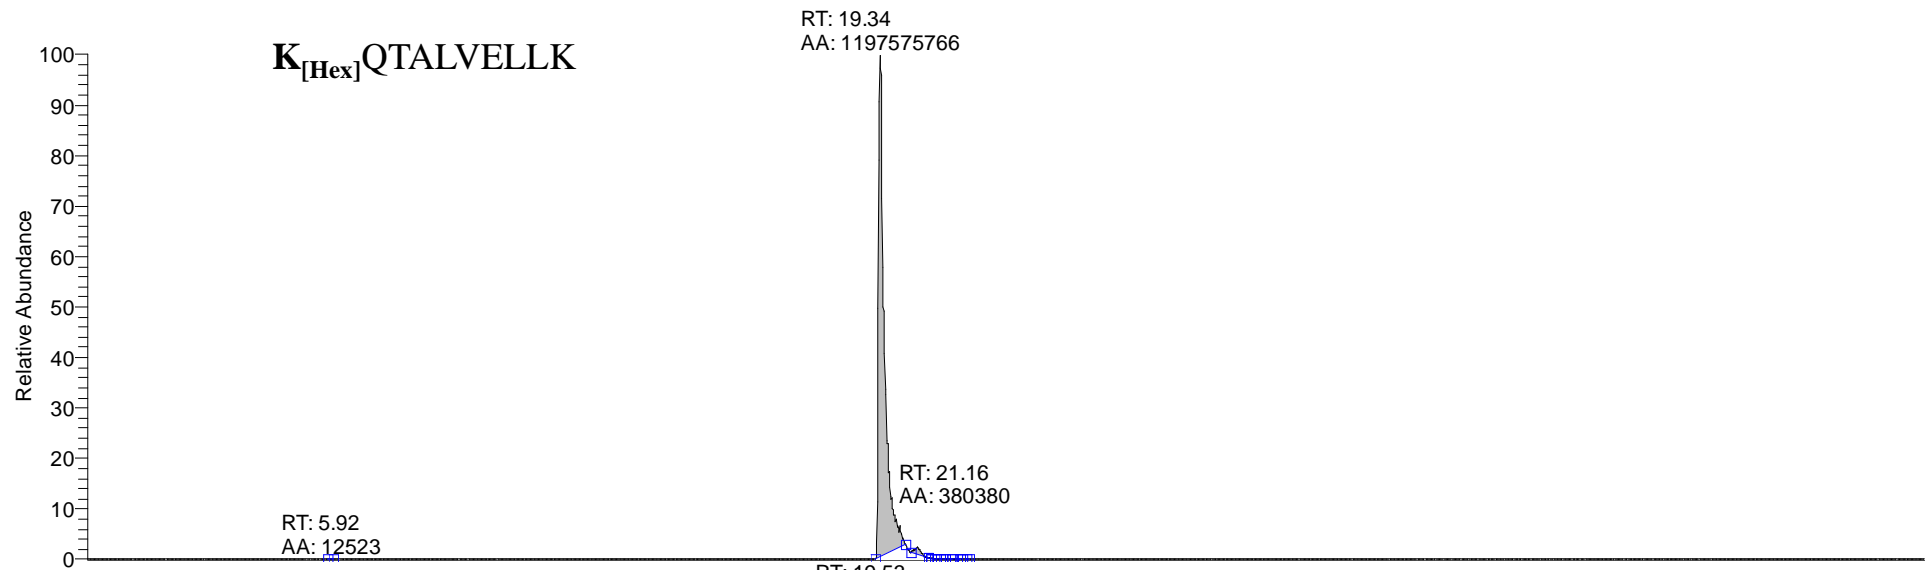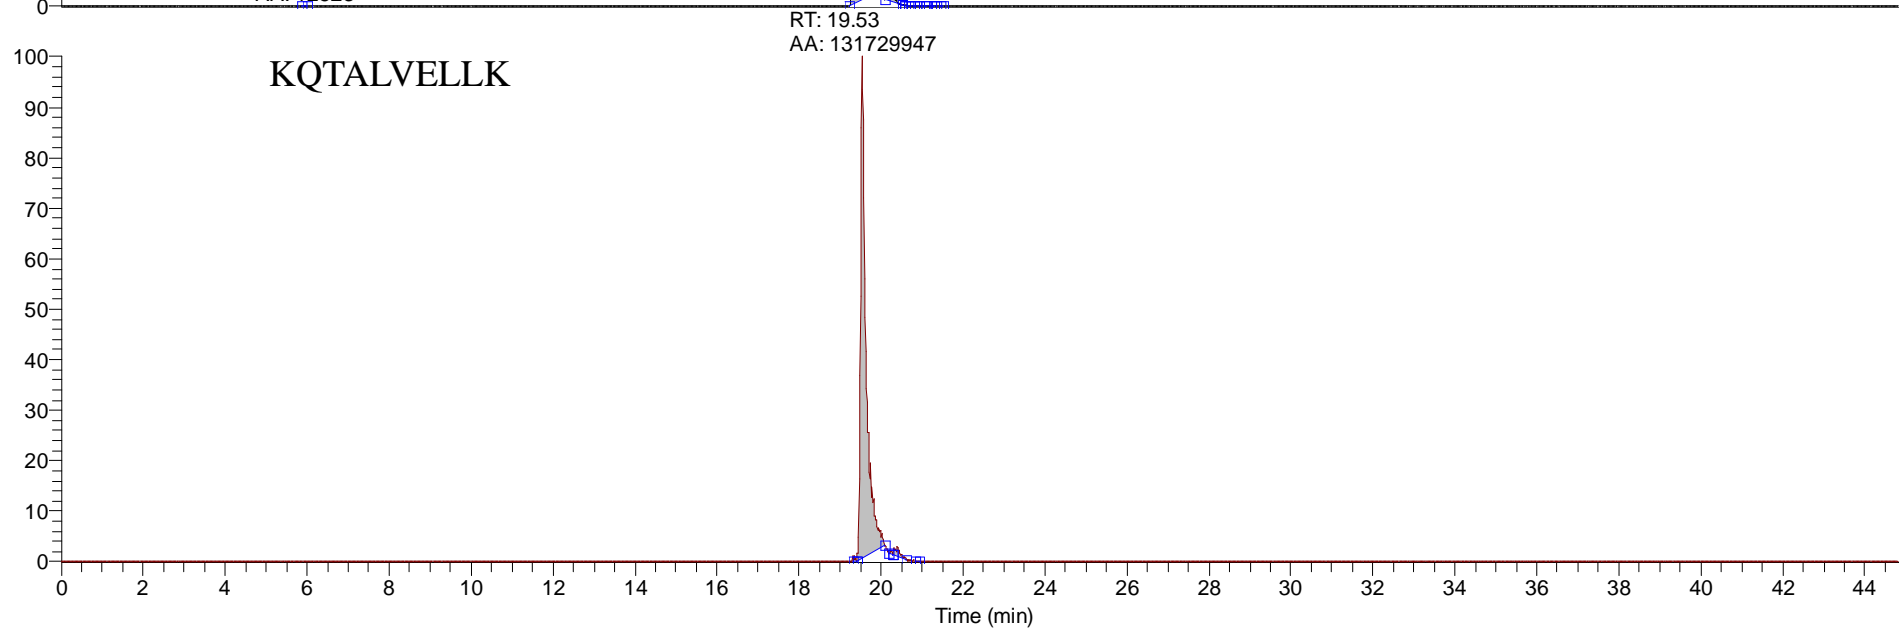

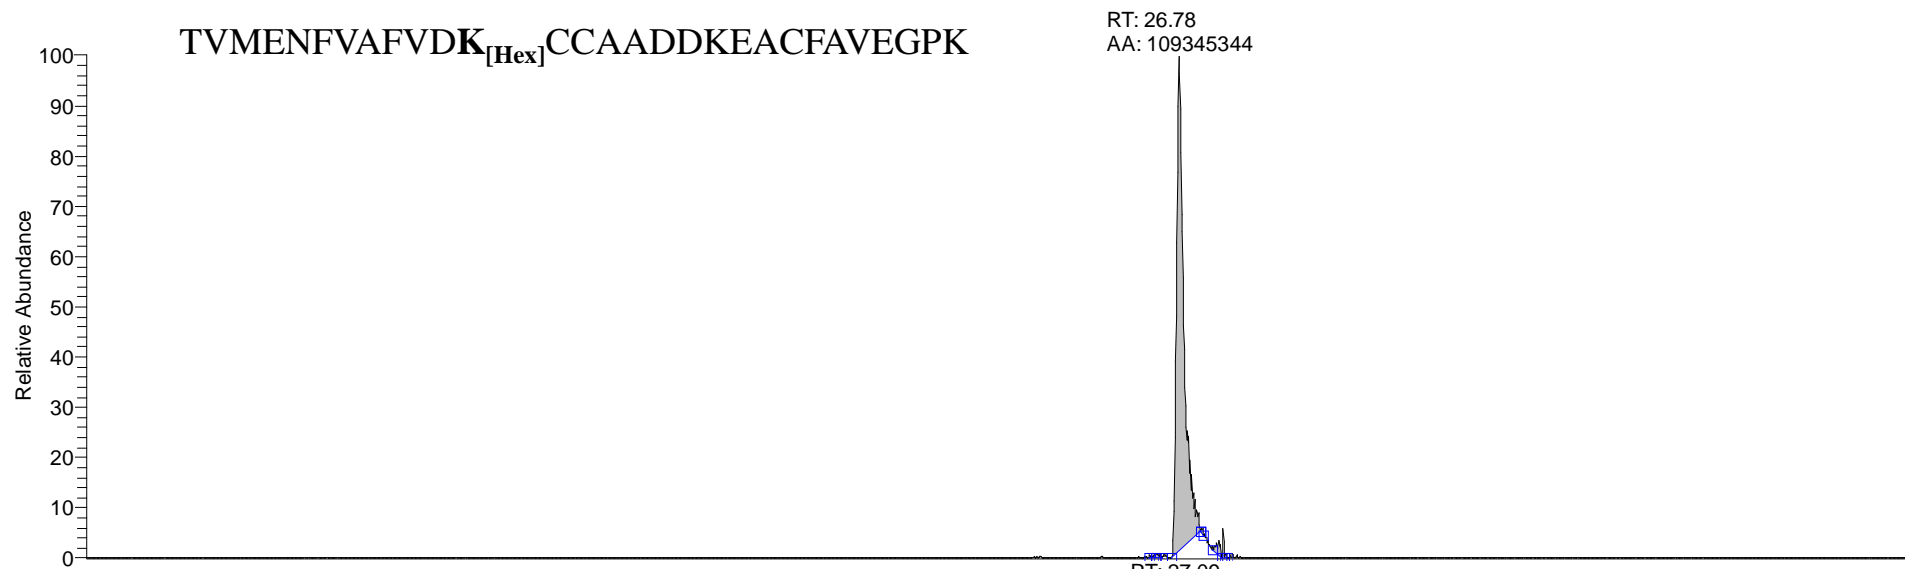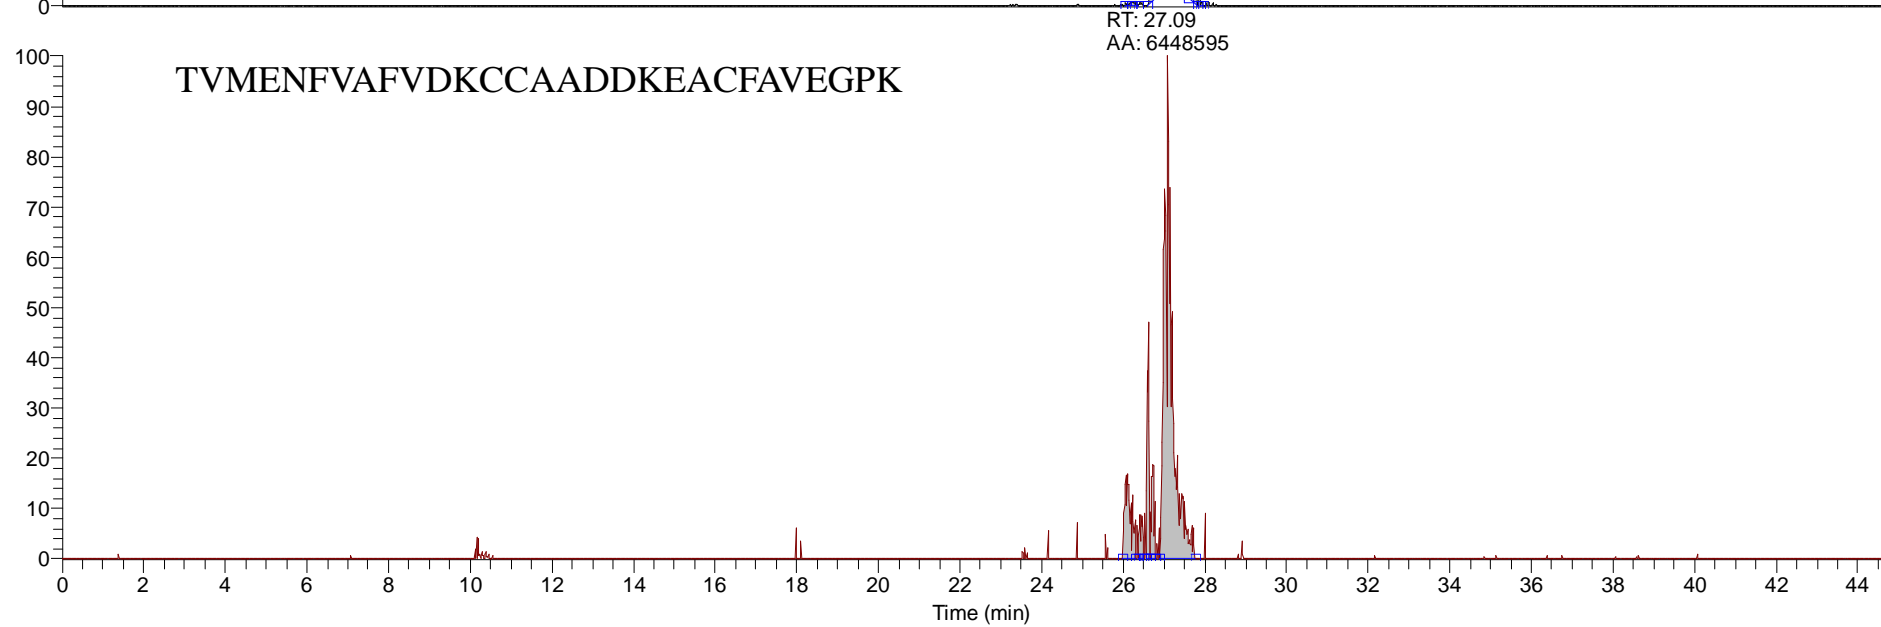

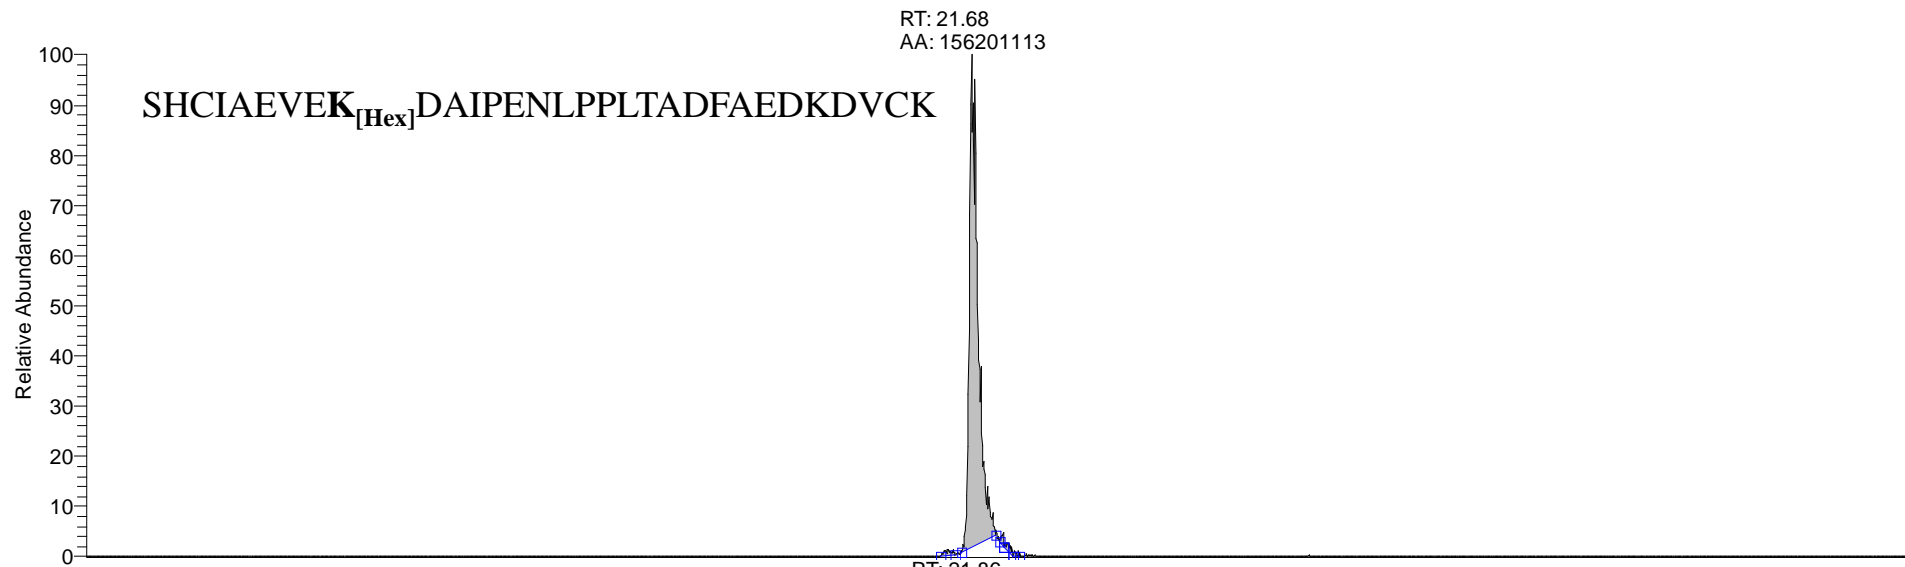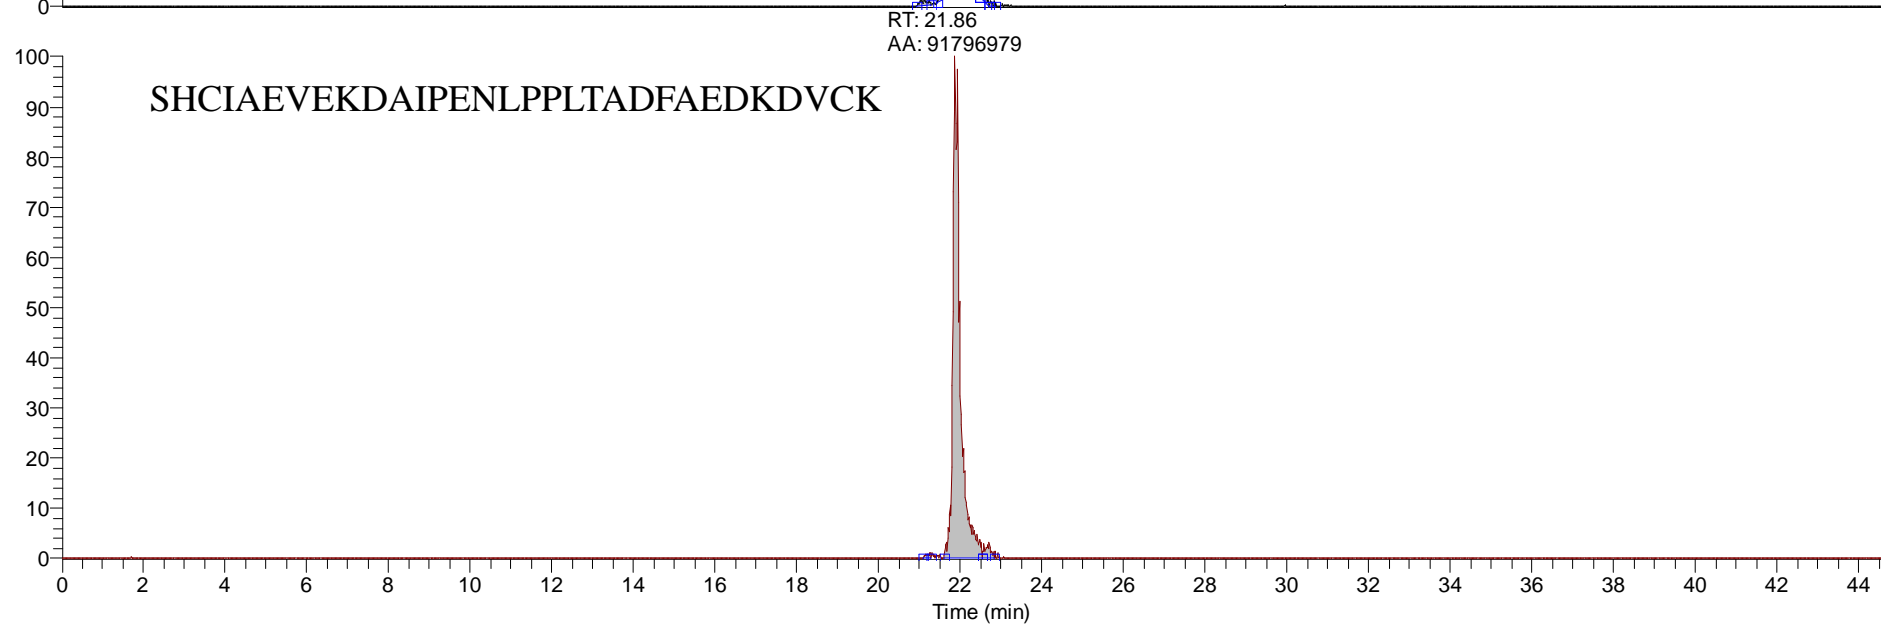

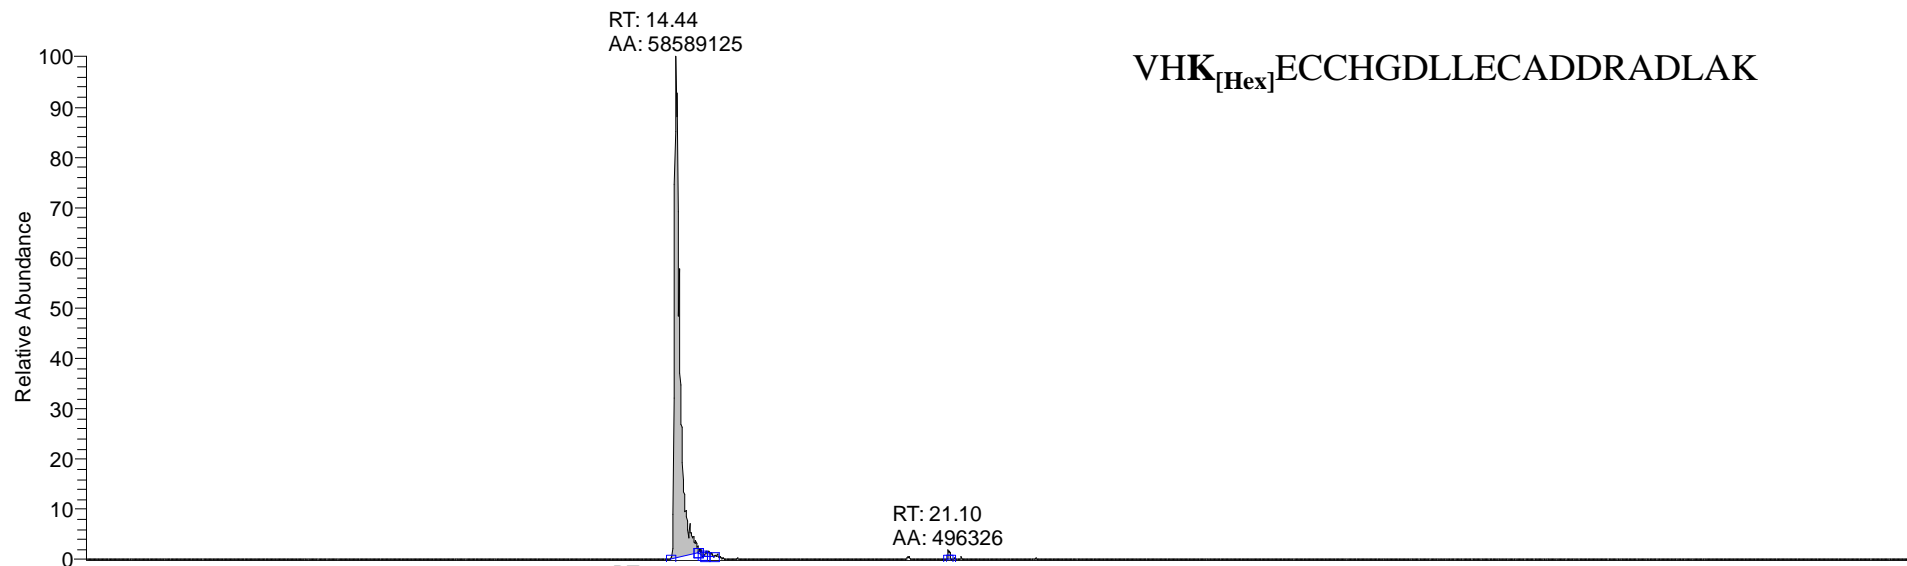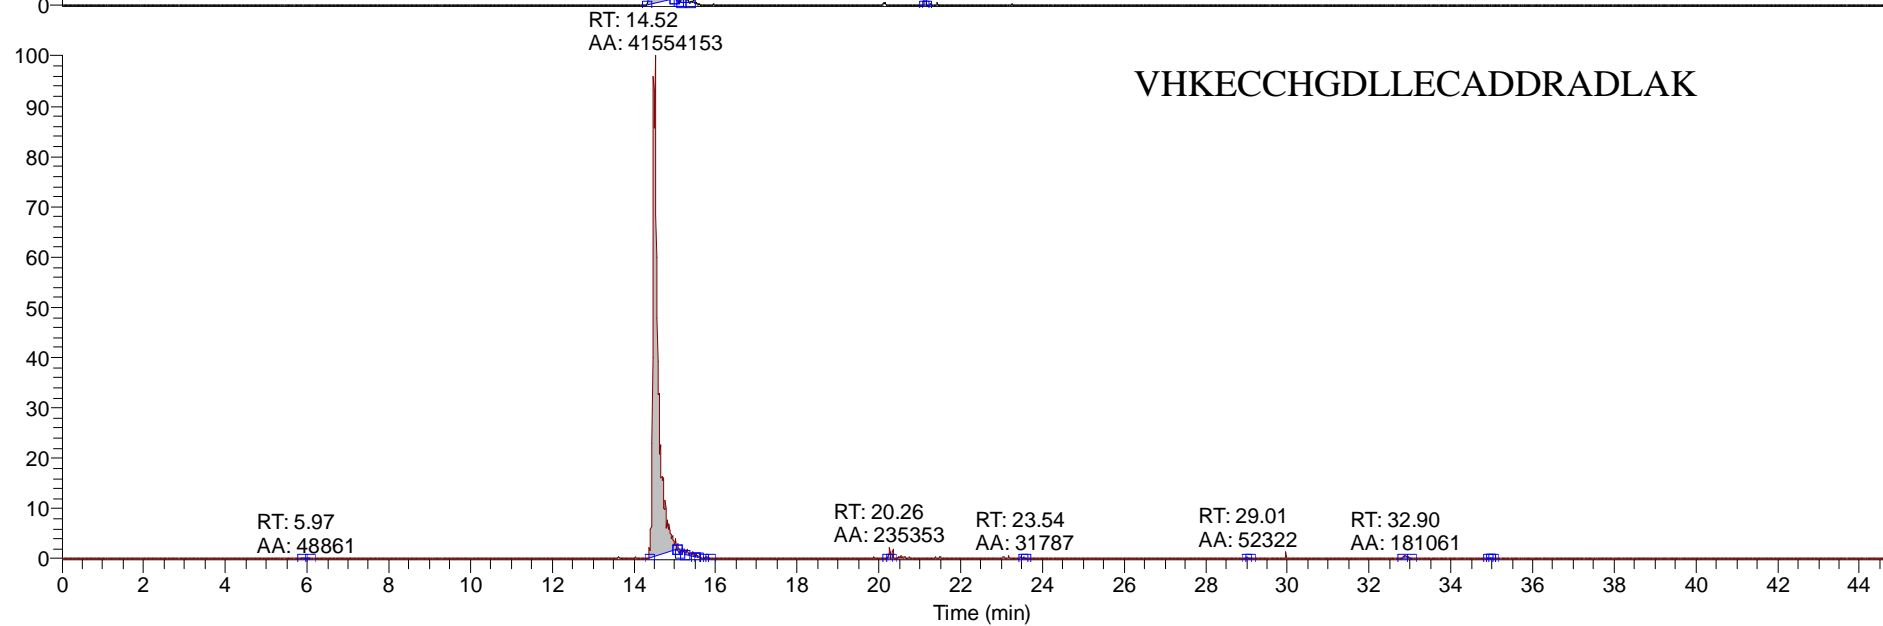

**Glycated modified peptides of BSA treated with Isoprenaline –  
XIC's**

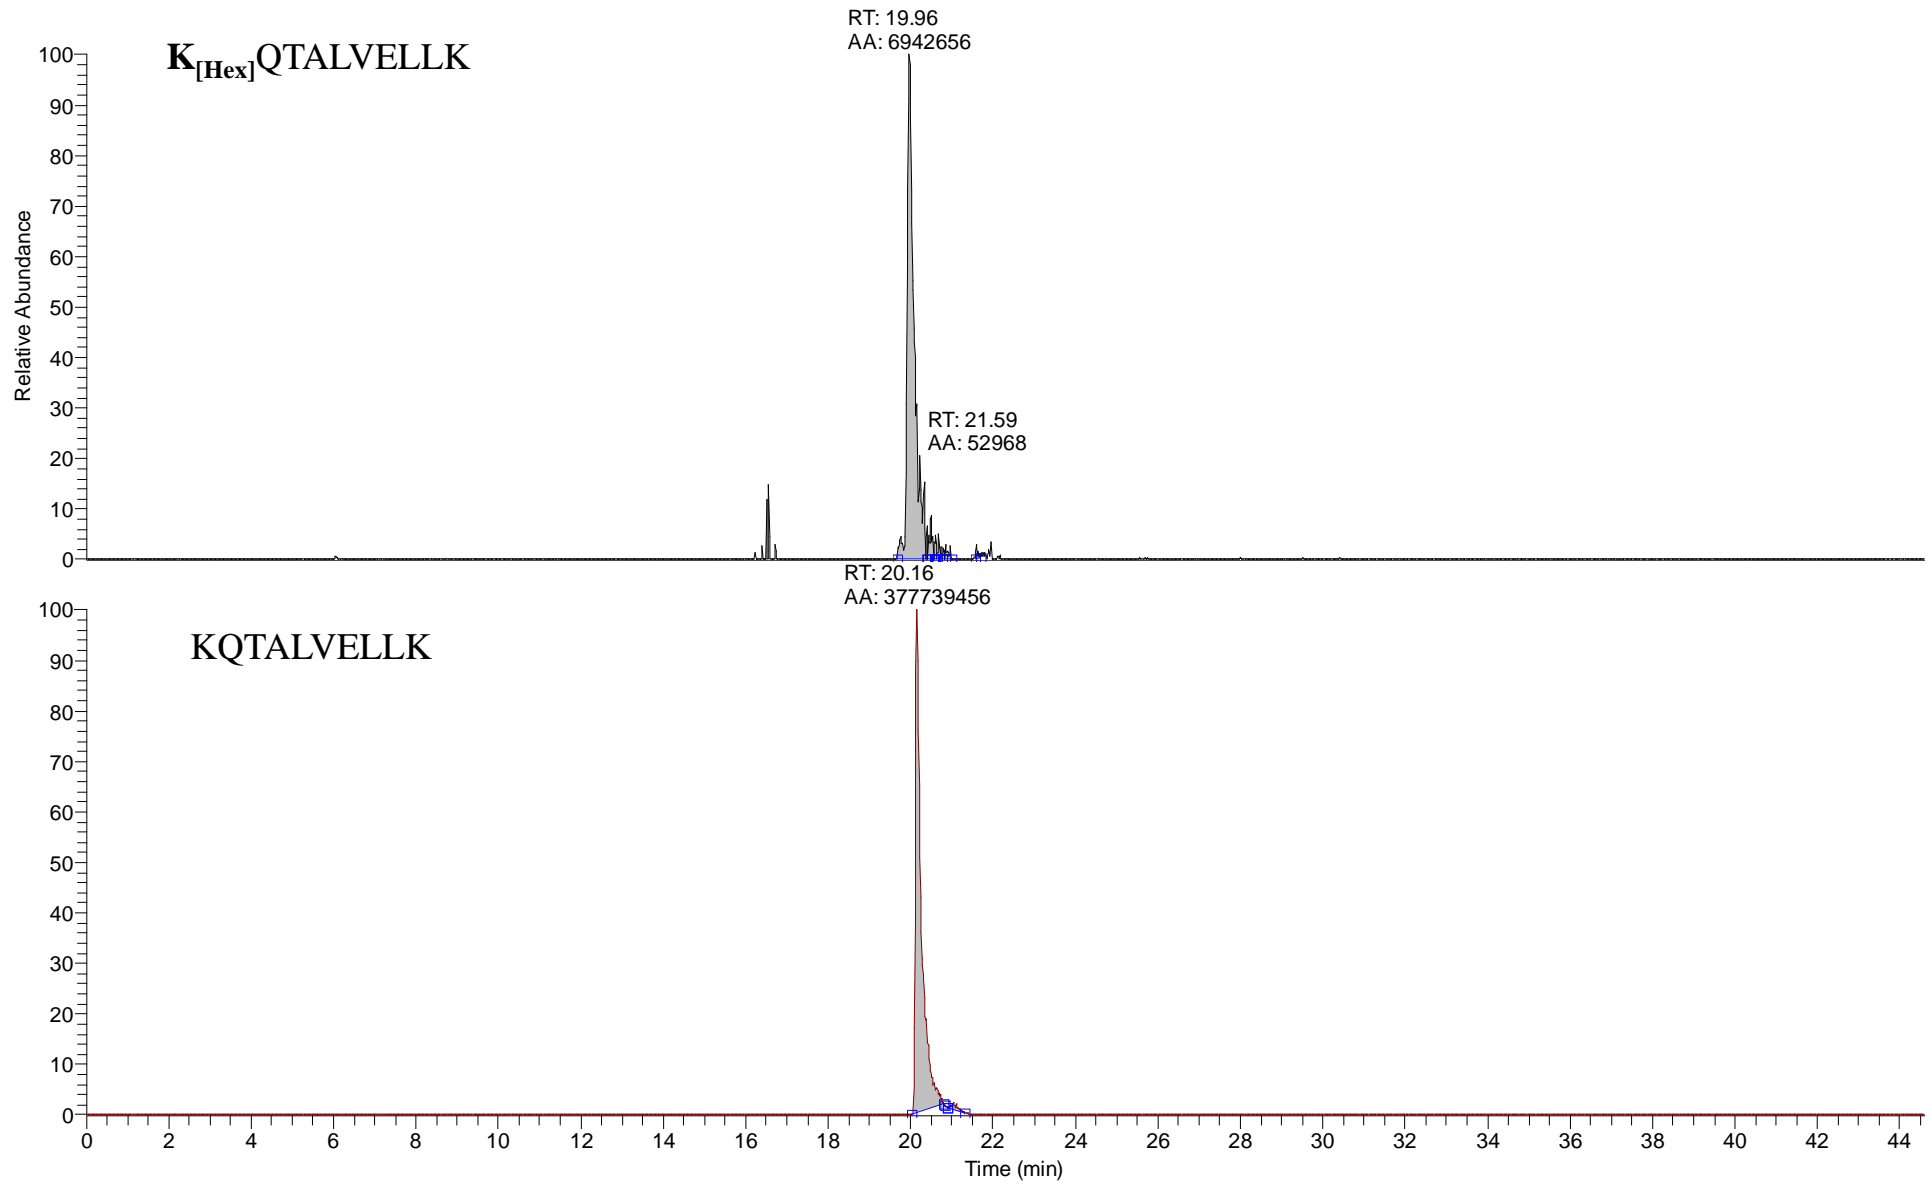



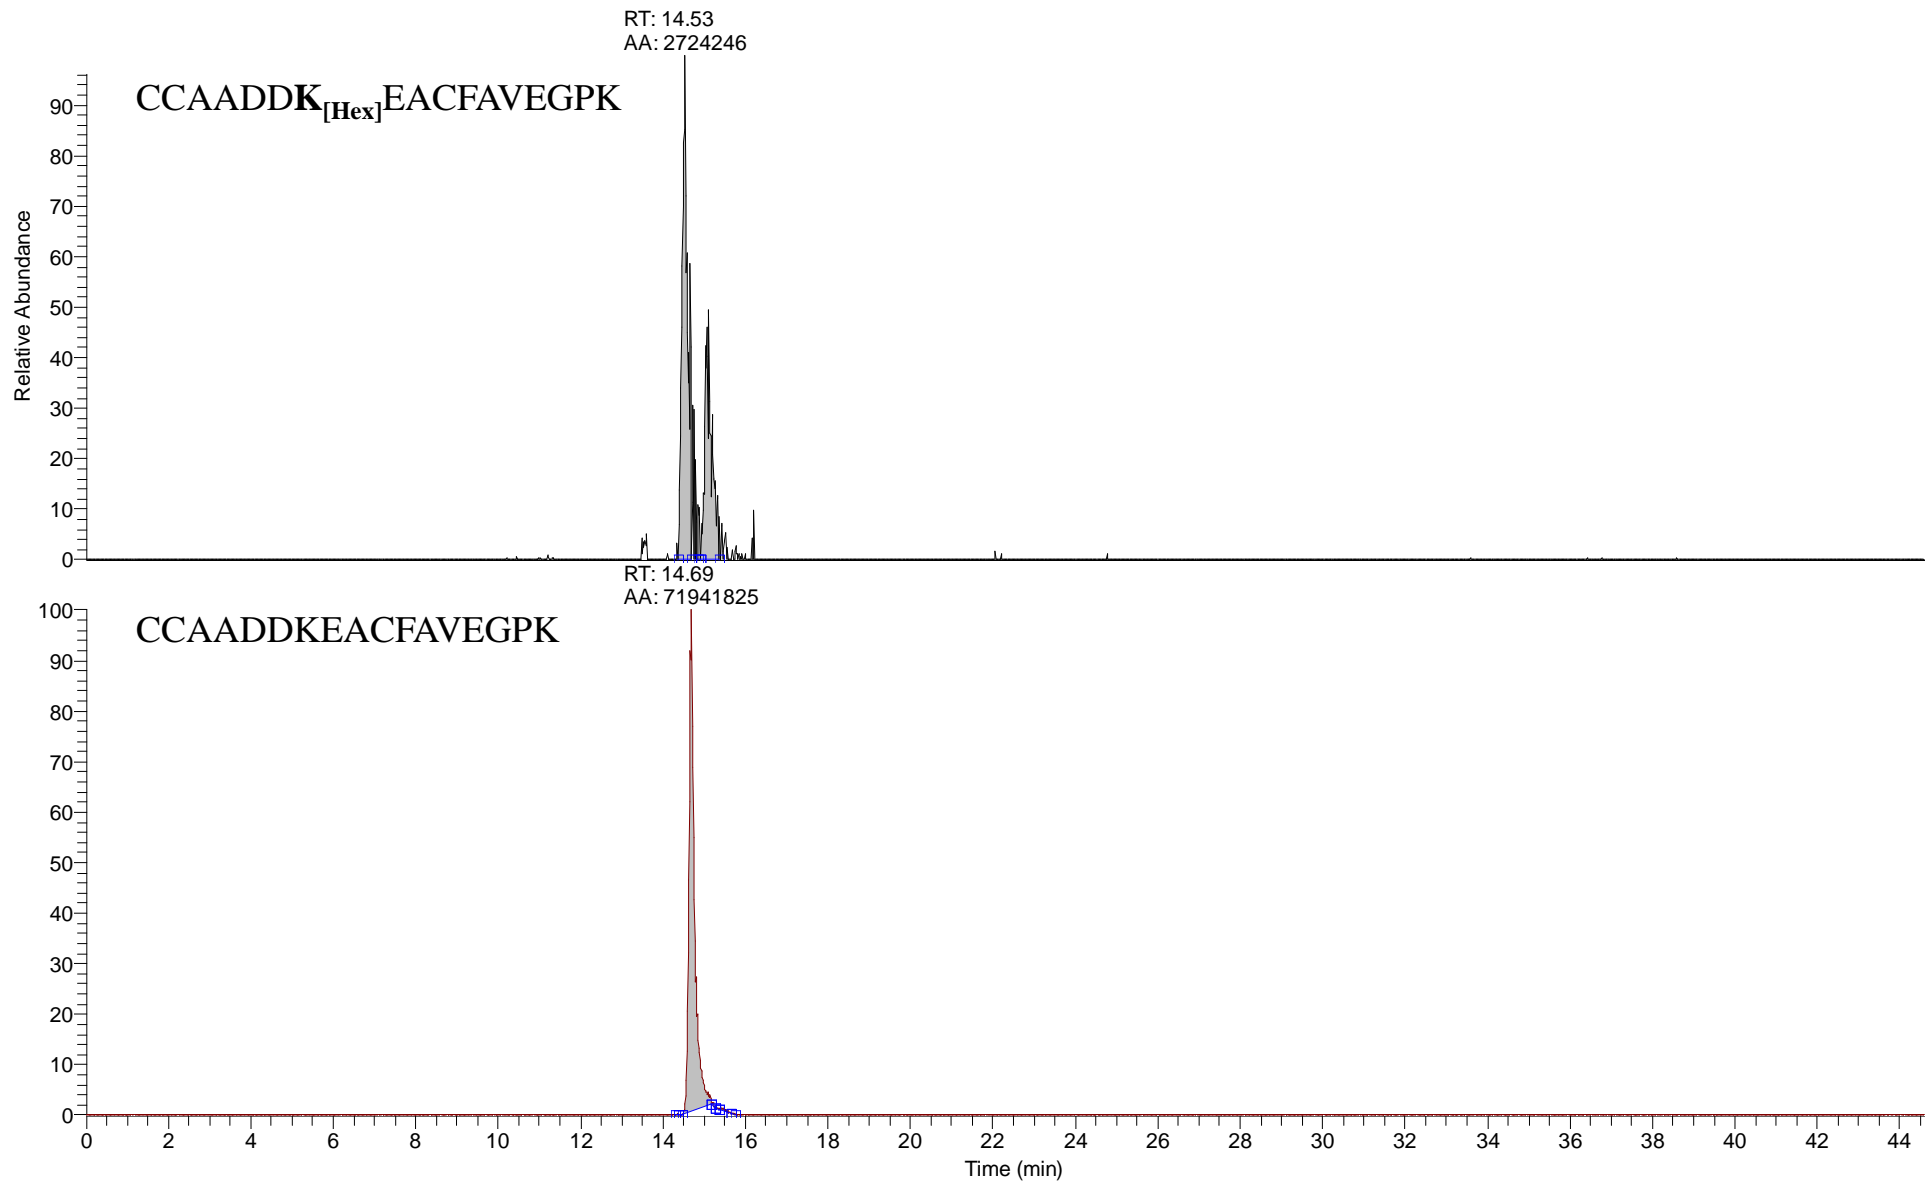

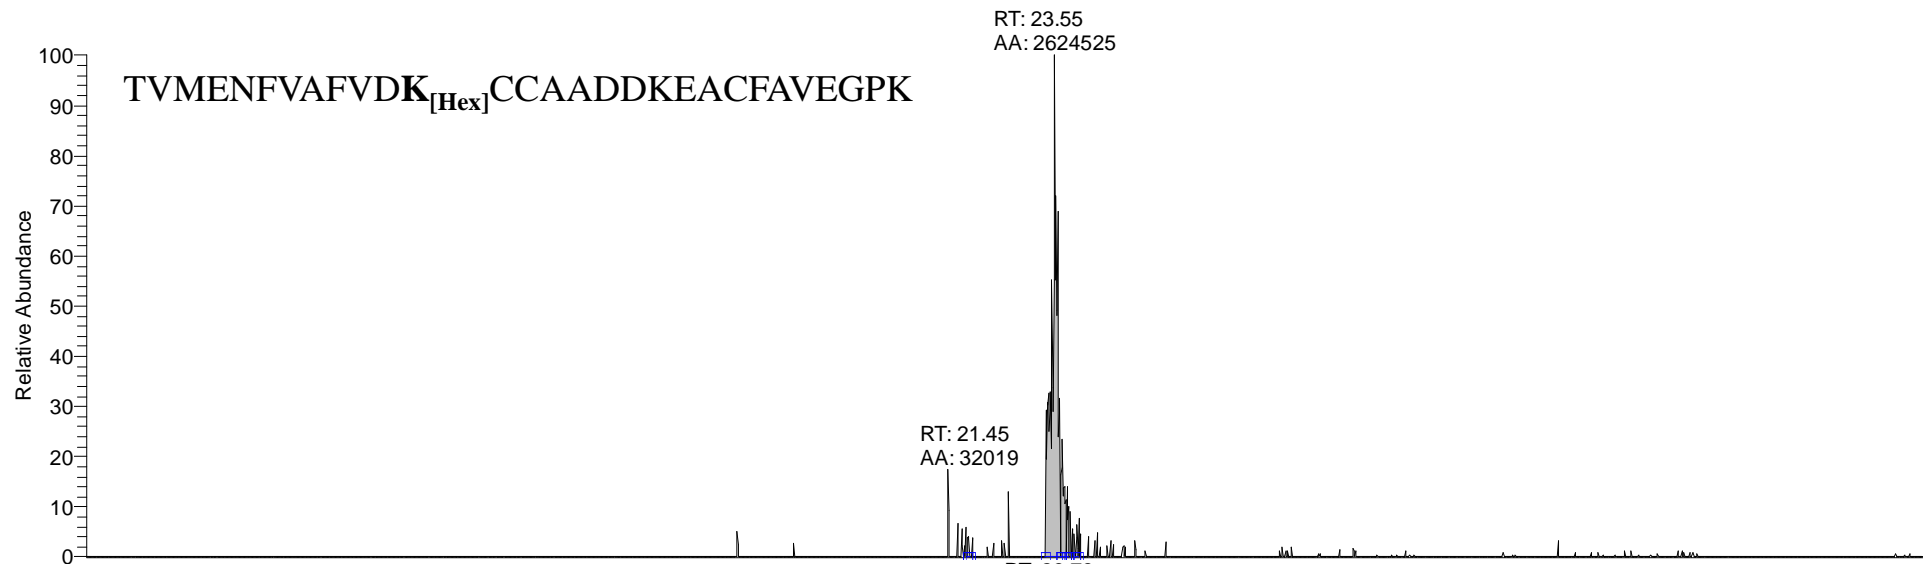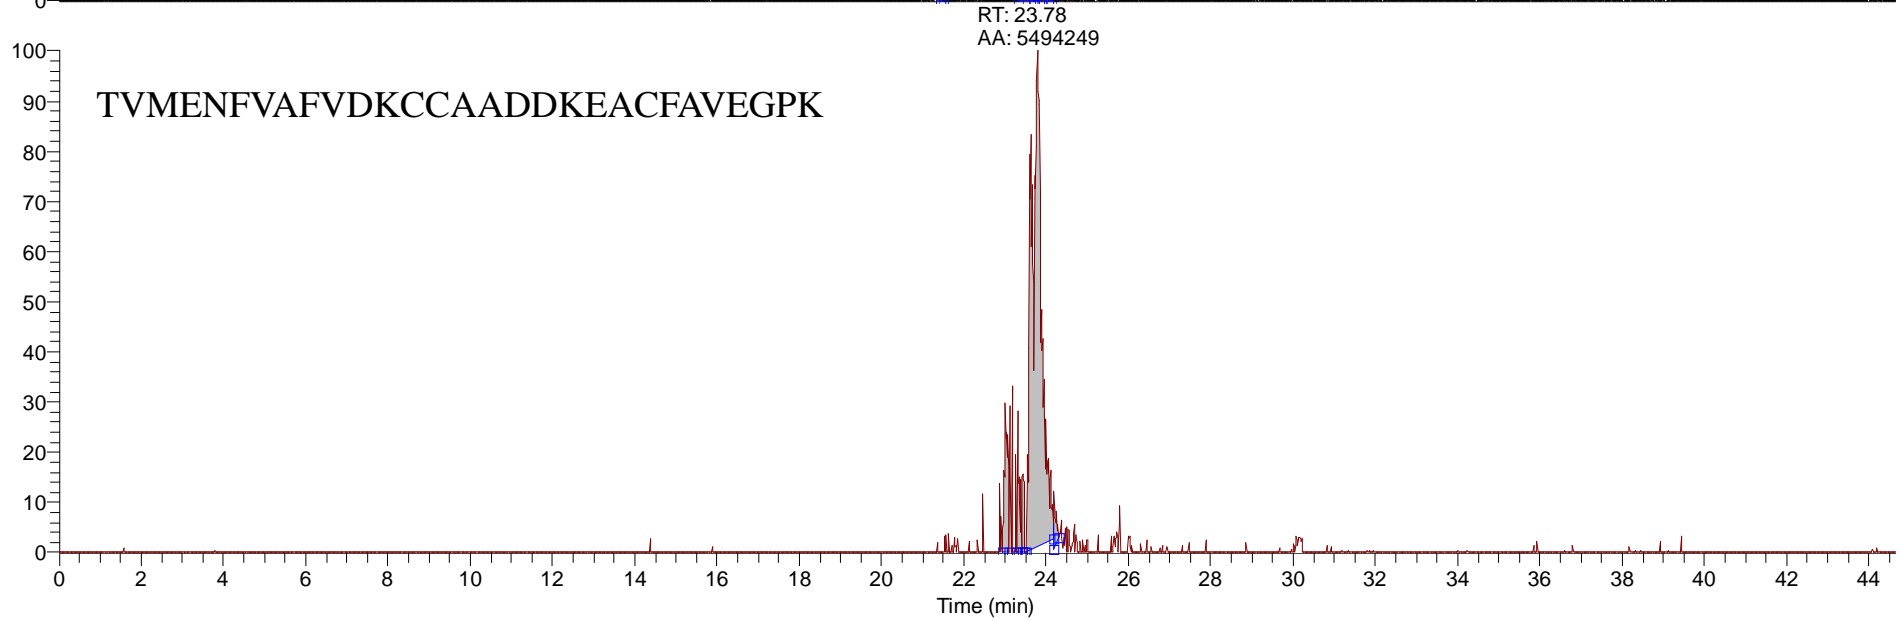

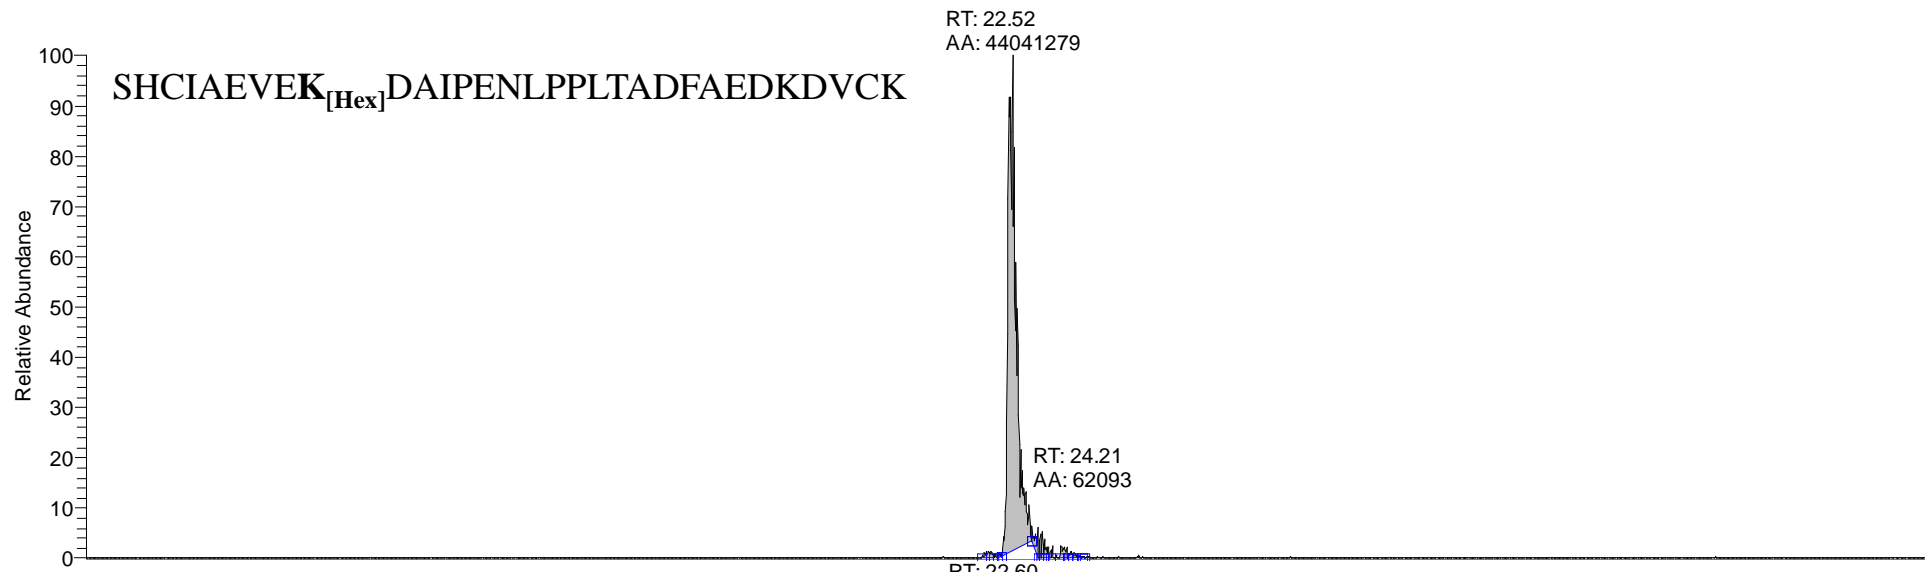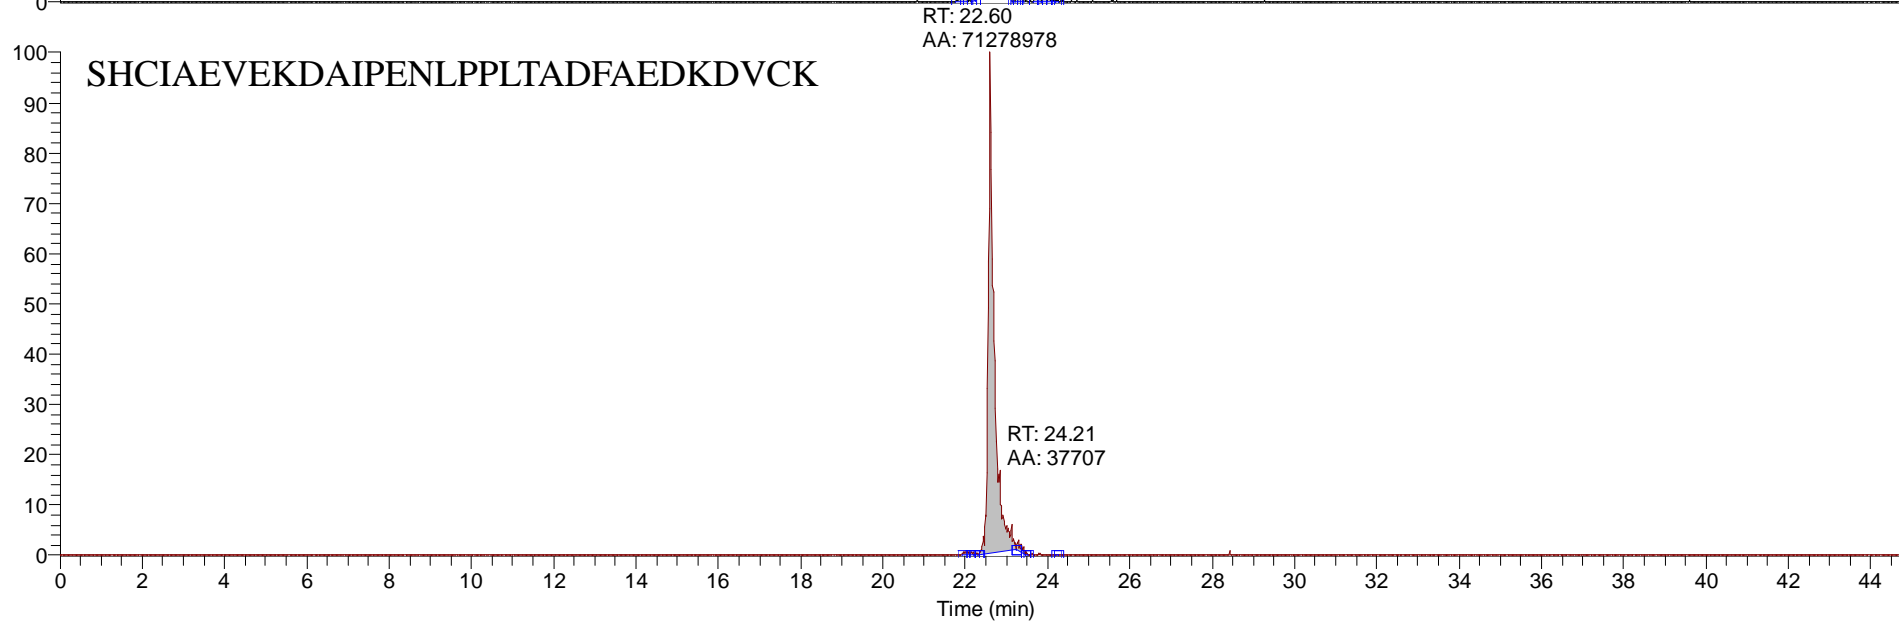

**Glycated modified peptides of BSA treated with Aminoguanidine  
– XIC's**

**K<sub>[Hex]</sub>QTALVELLK**

RT: 19.37  
AA: 642018347

Relative Abundance

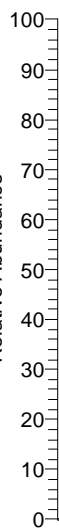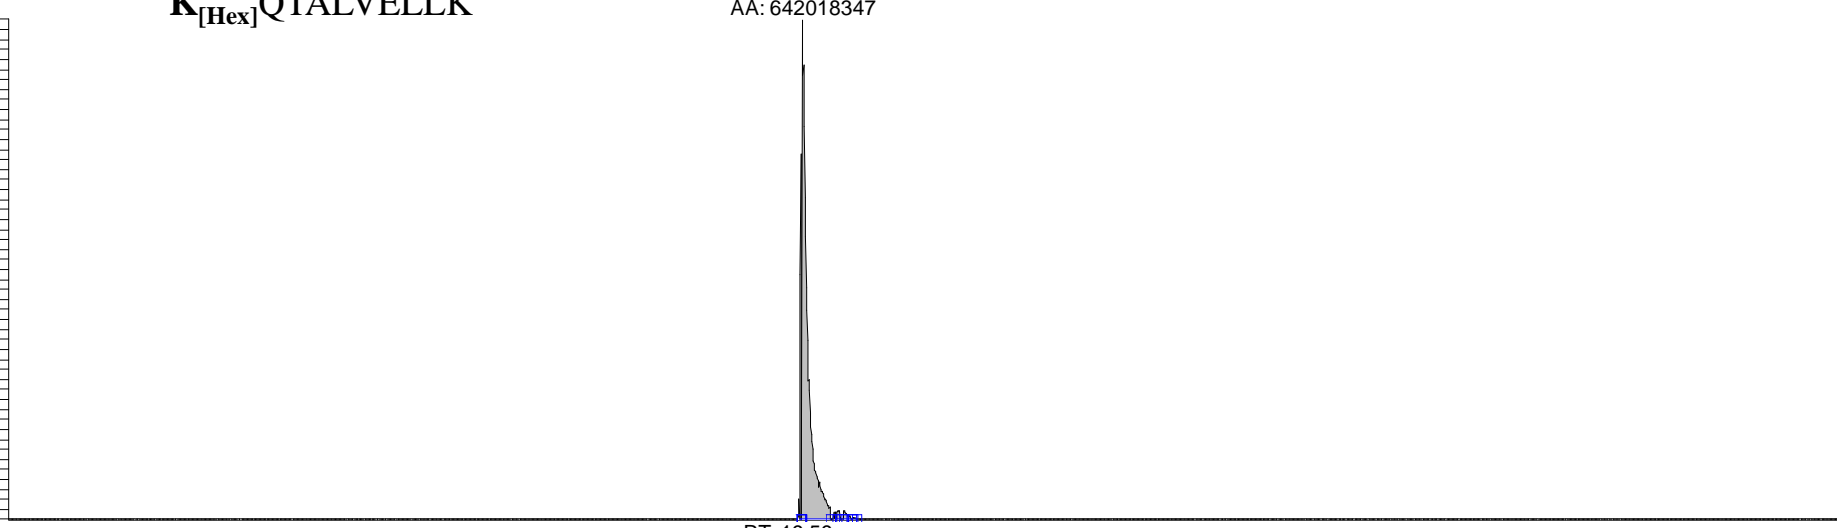

RT: 19.59  
AA: 97829528

**KQTALVELLK**

RT: 17.80  
AA: 145313

Relative Abundance

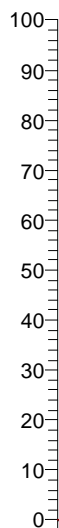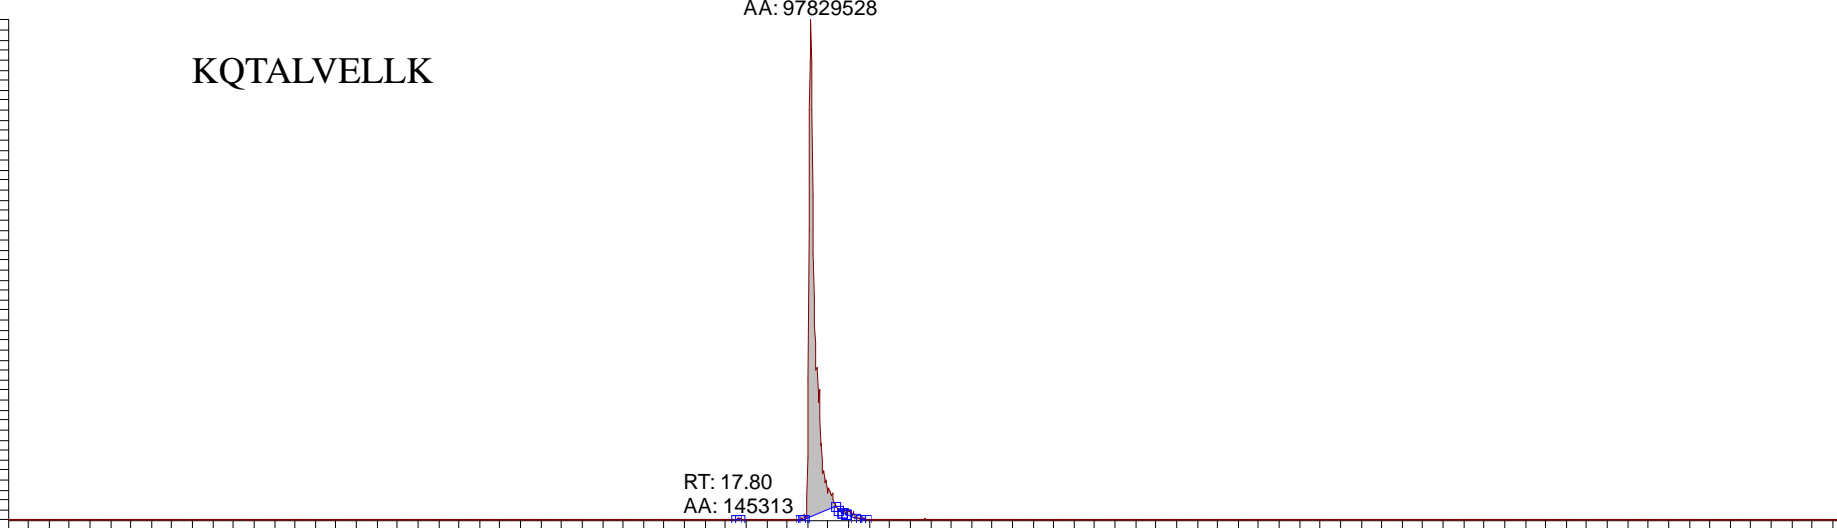

Time (min)

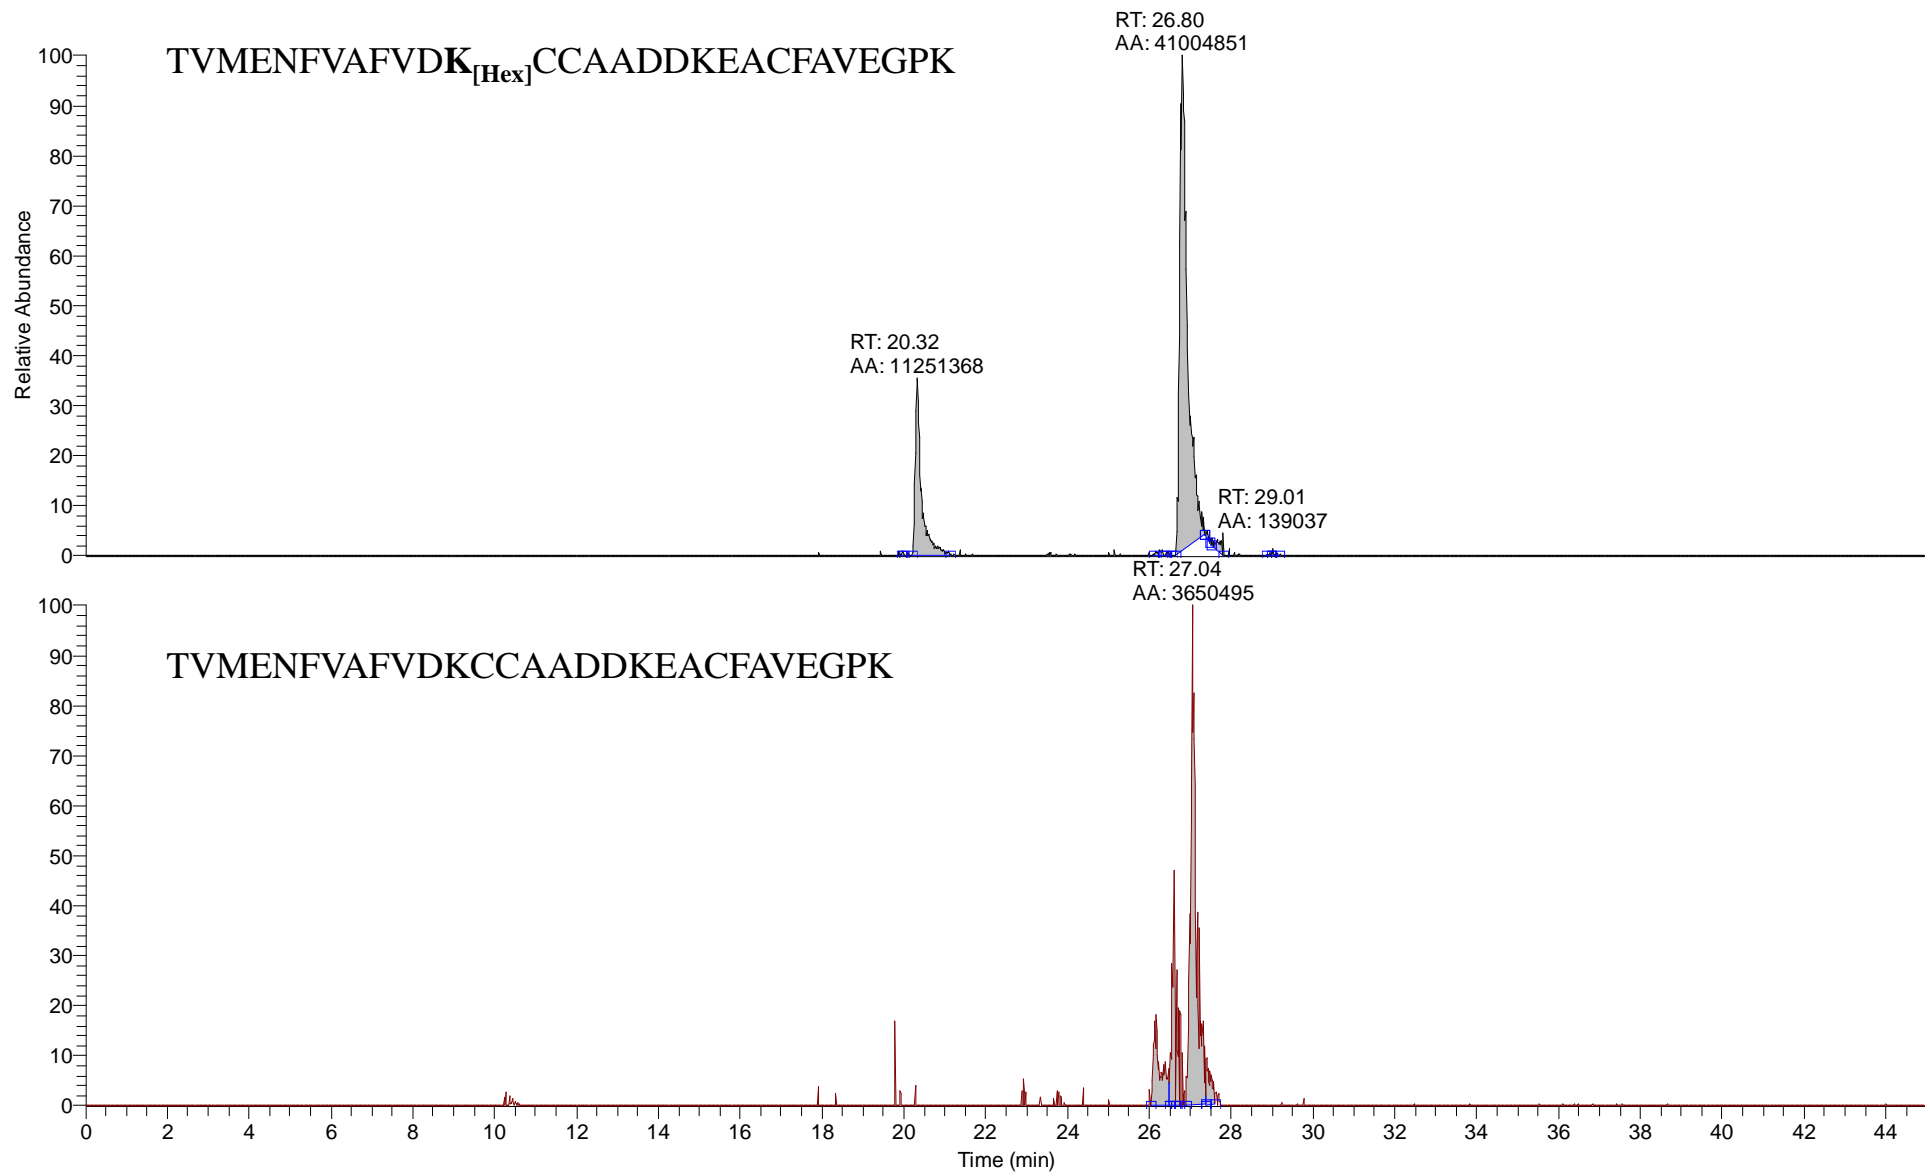

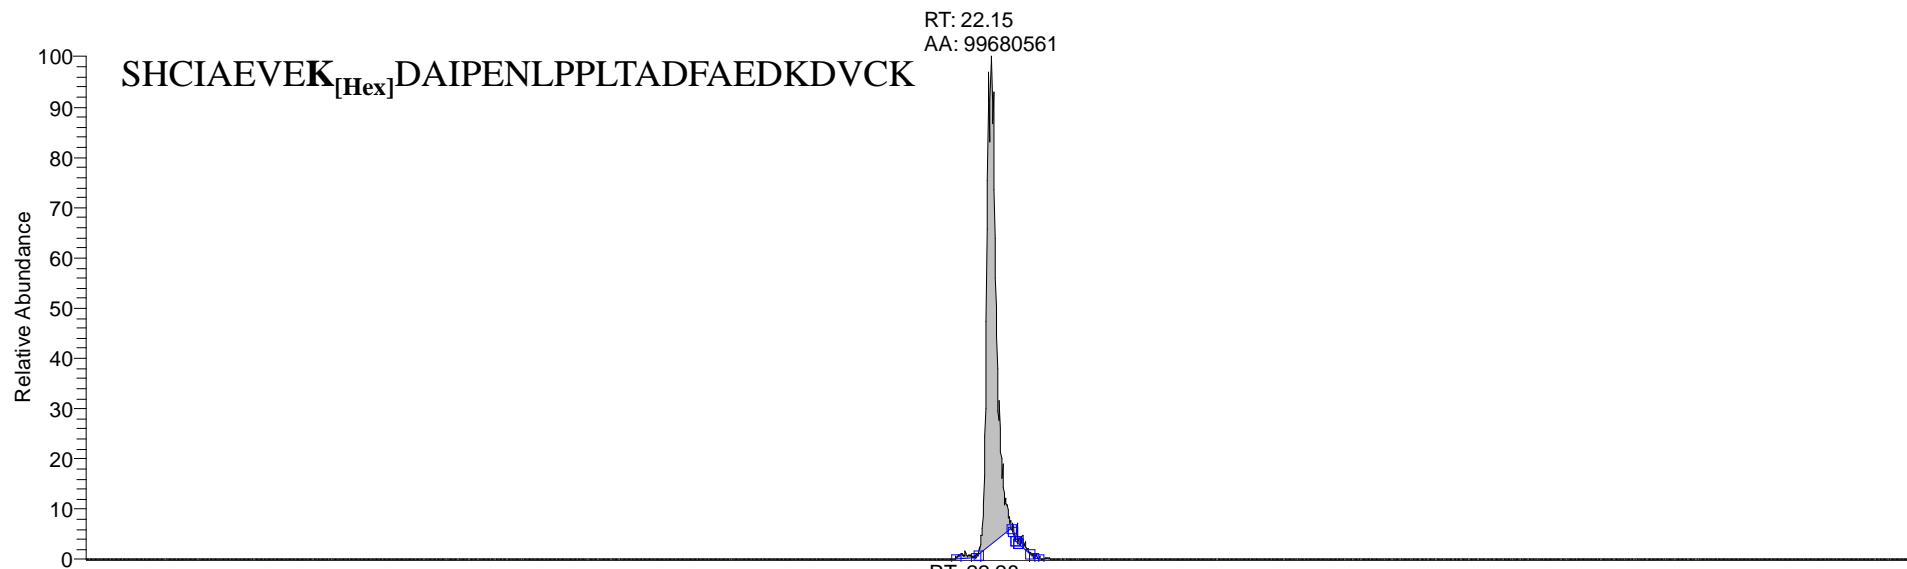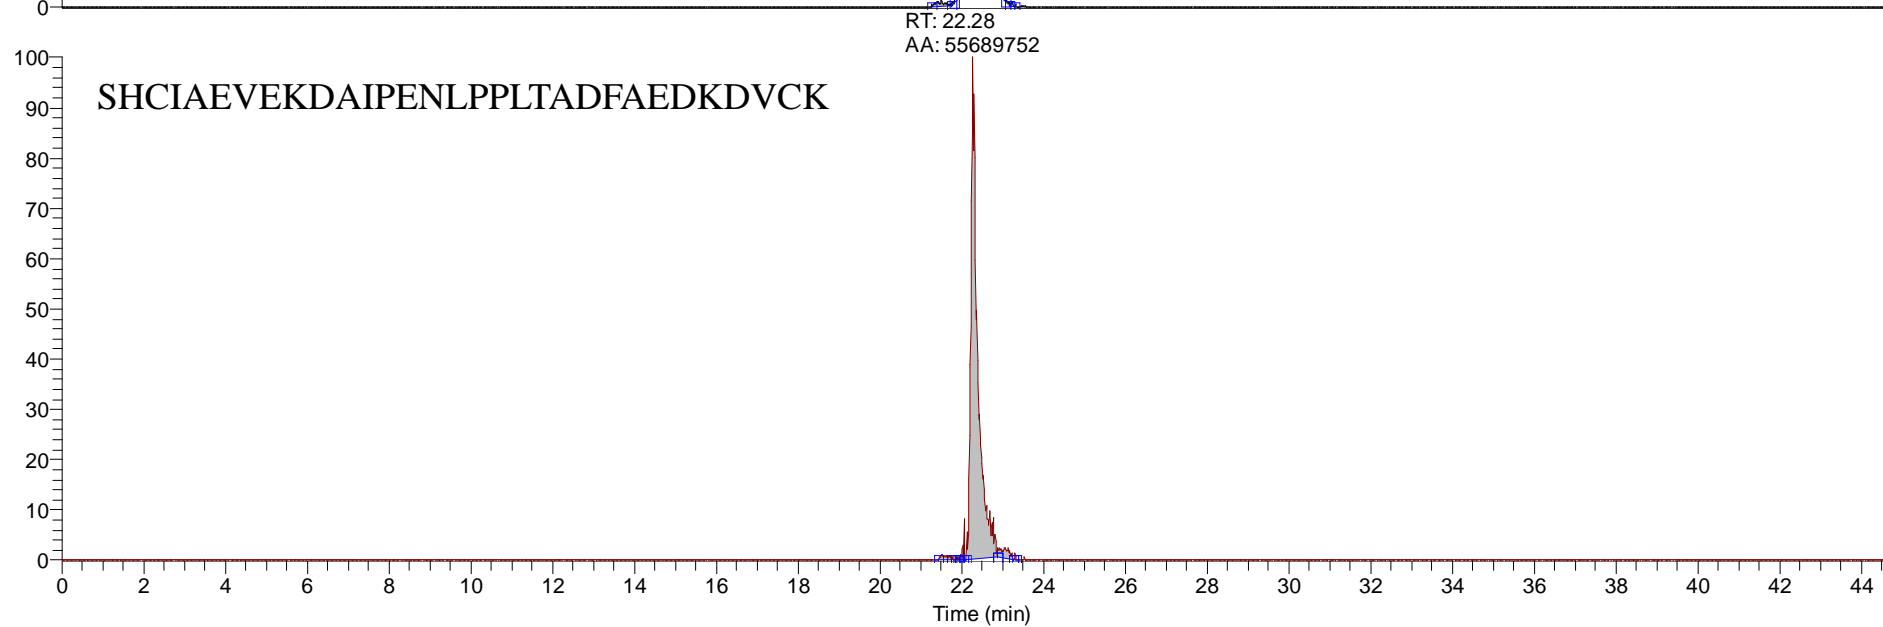

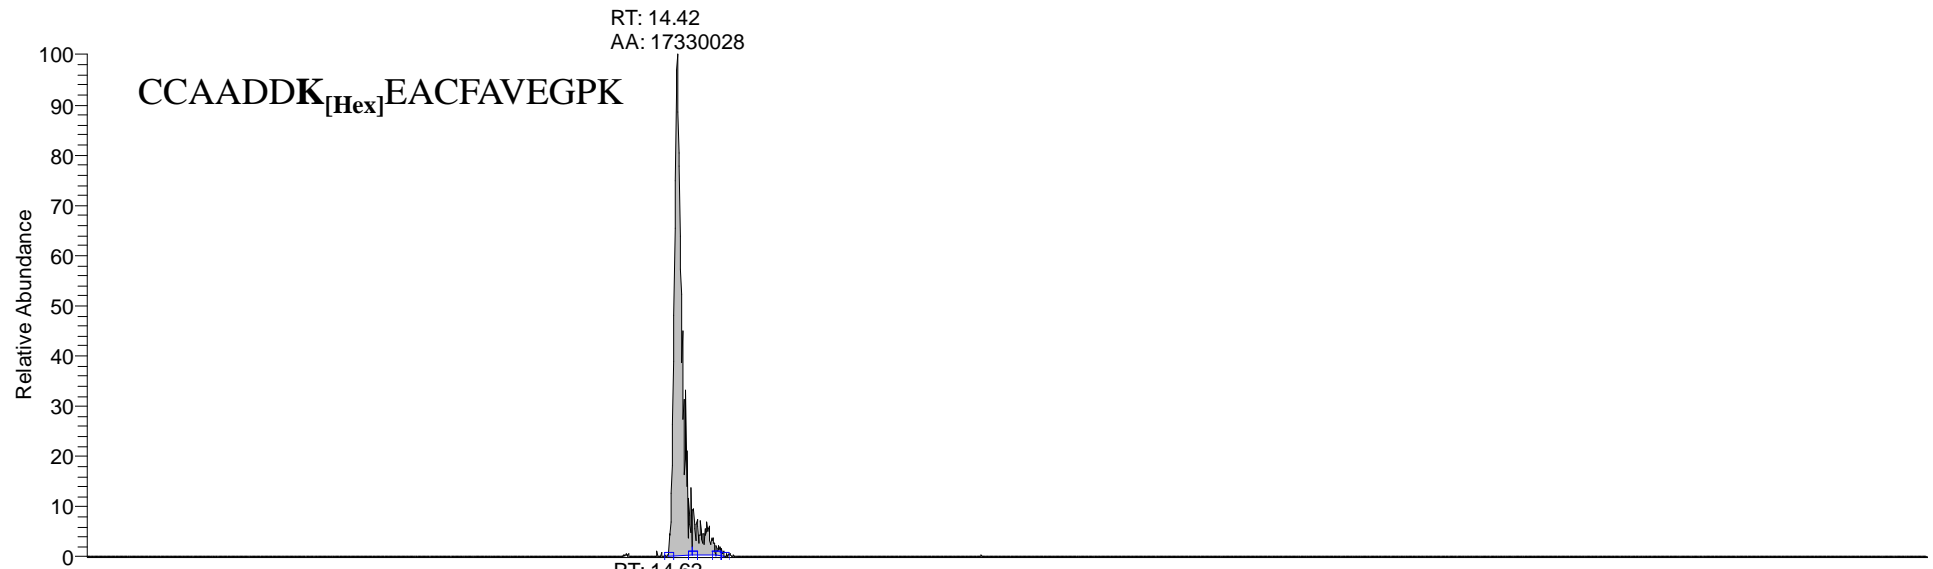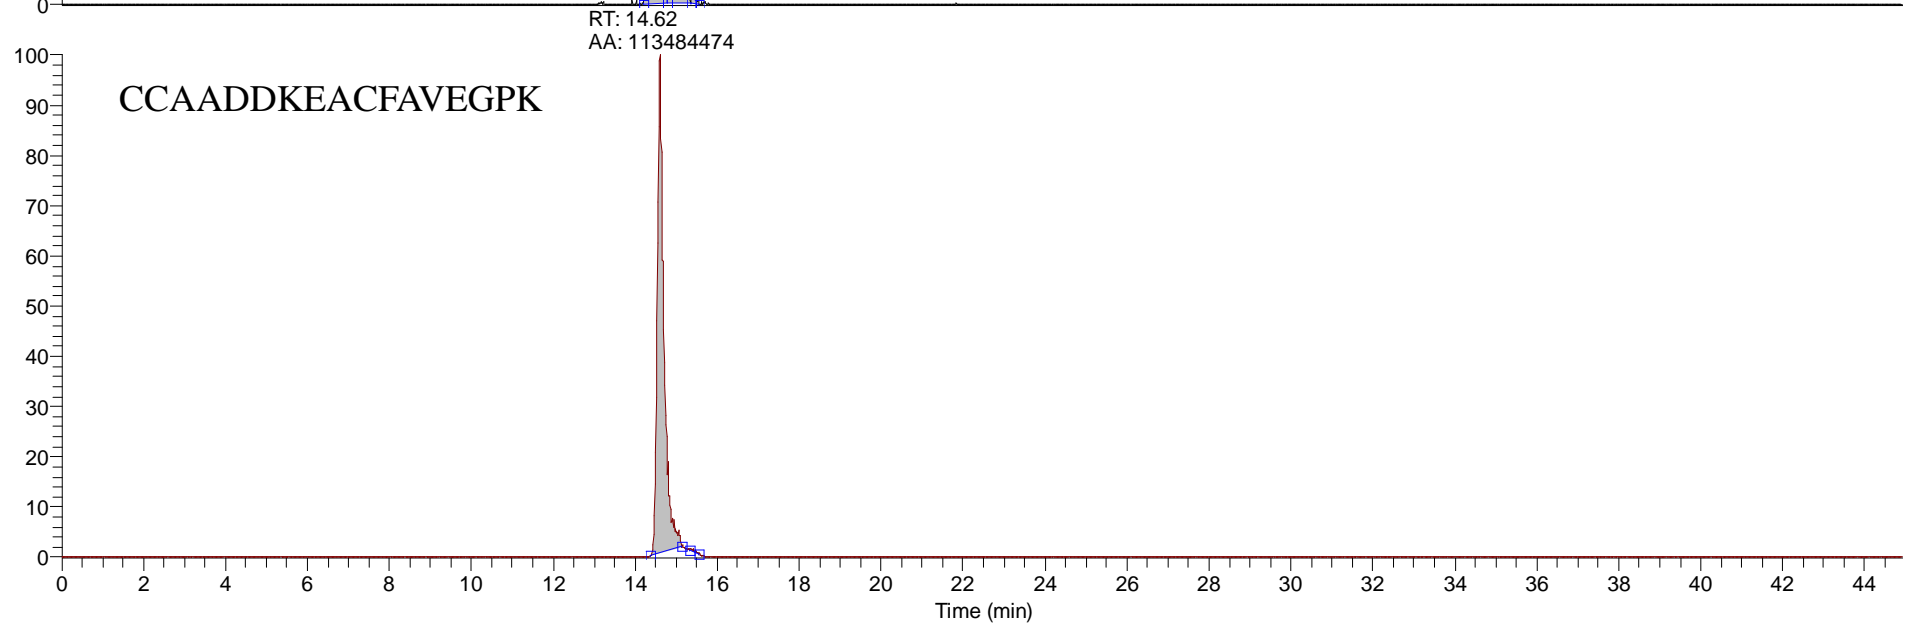



Figure 3. (Supplementary) Extent of glycation quantification of glucose sensitive peptides (GSPs) by extracted ion chromatograms (XIC).

A

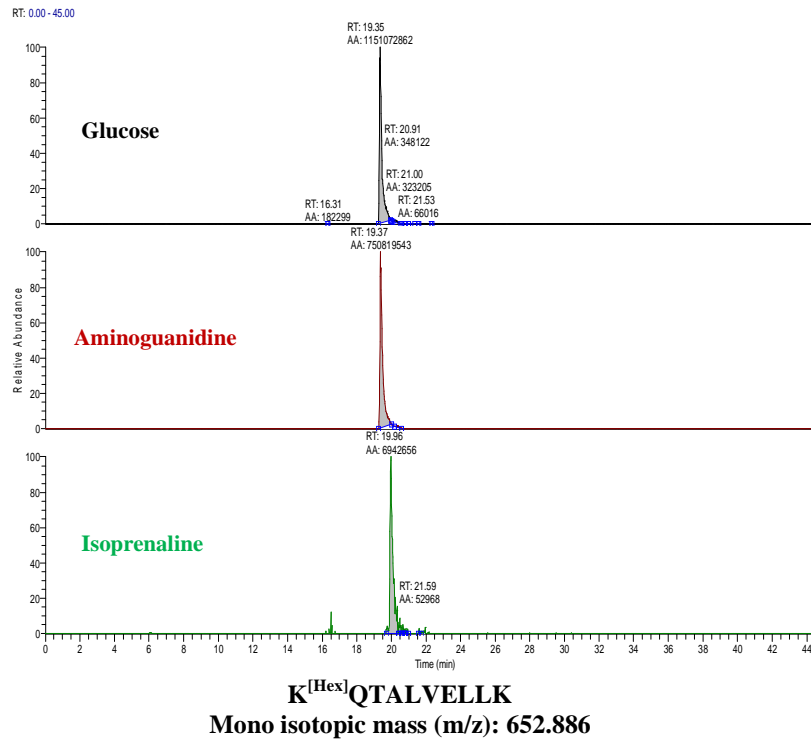

B

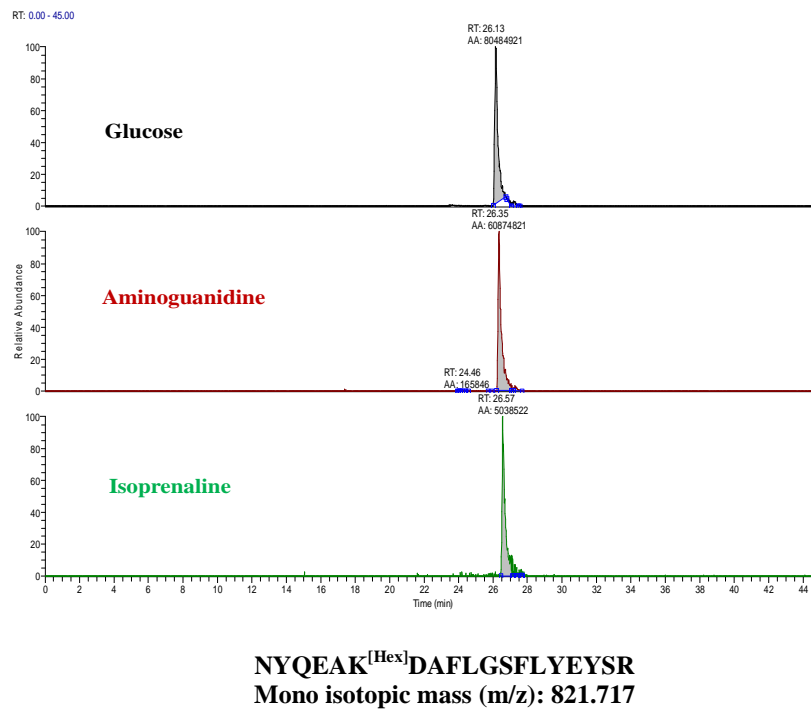

C

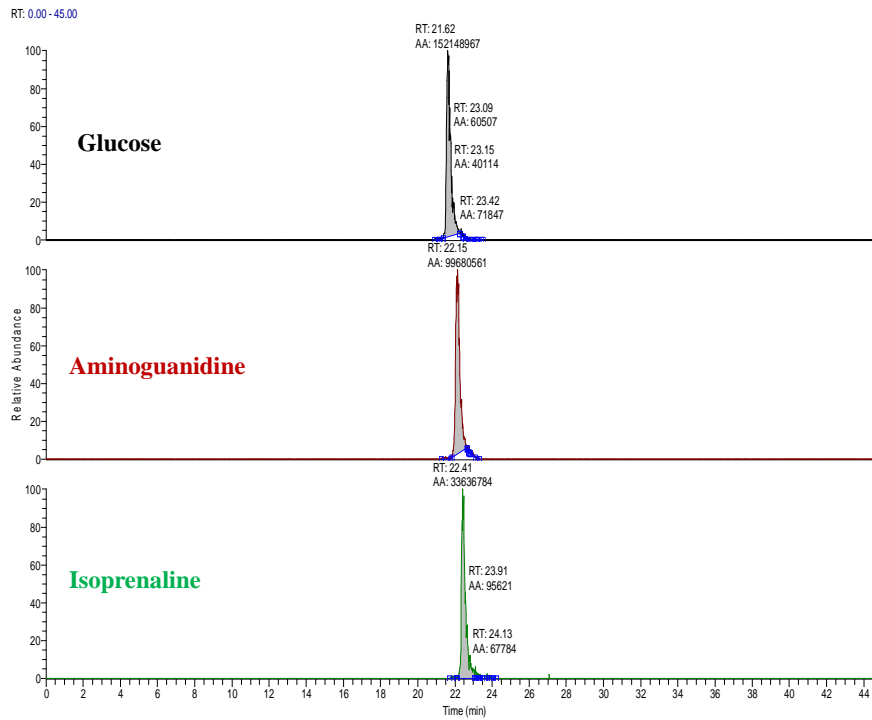

**SHCIAEVEK<sup>[Hex]</sup>DAIPENLPPLTADFAEDKDVCK**  
Mono isotopic mass (m/z): 919.184

D

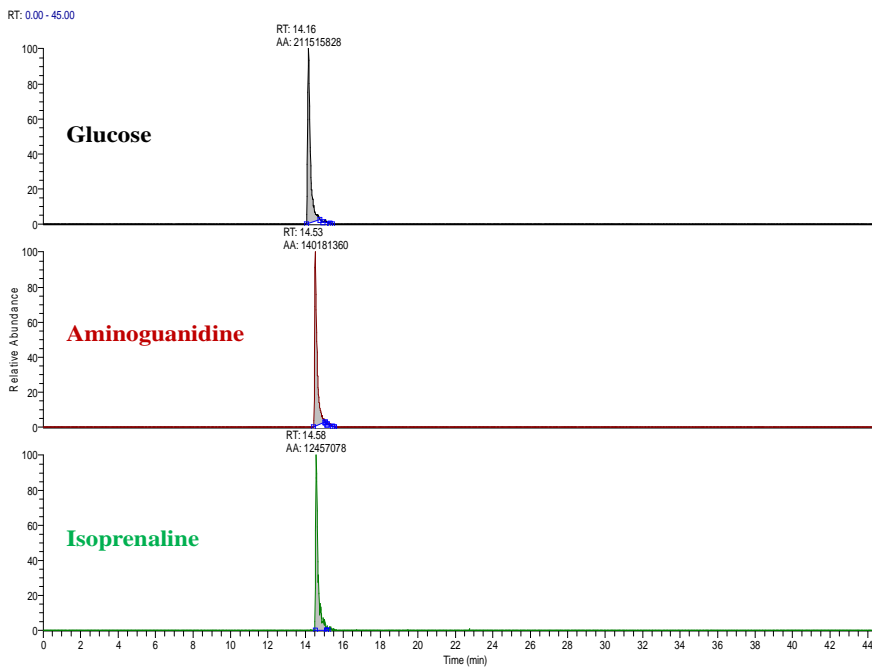

**LAK<sup>[Hex]</sup>EYEATLEECCA**  
Mono isotopic mass (m/z): 659.630

E

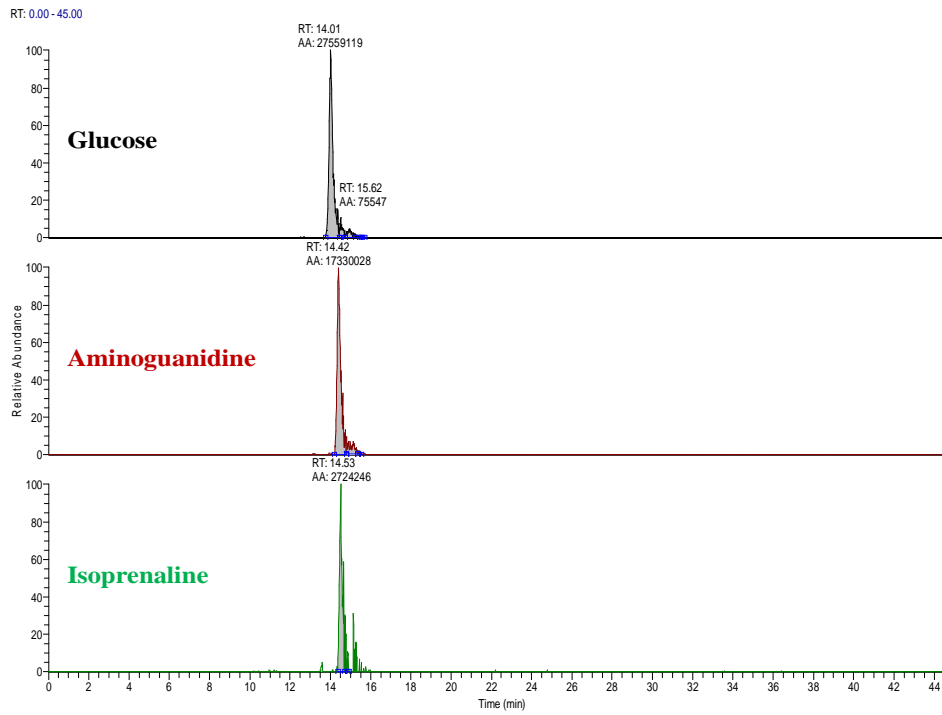

**CCAADDK<sup>[Hex]</sup>EACFAVEGPK**  
**Mono isotopic mass (m/z): 697.287**

Figure 4. (Supplementary) Extent of glycation quantification of glucose sensitive peptides (GSPs) by extracted ion chromatograms (XIC).

**Glycated modified peptides of BSA – XIC's**

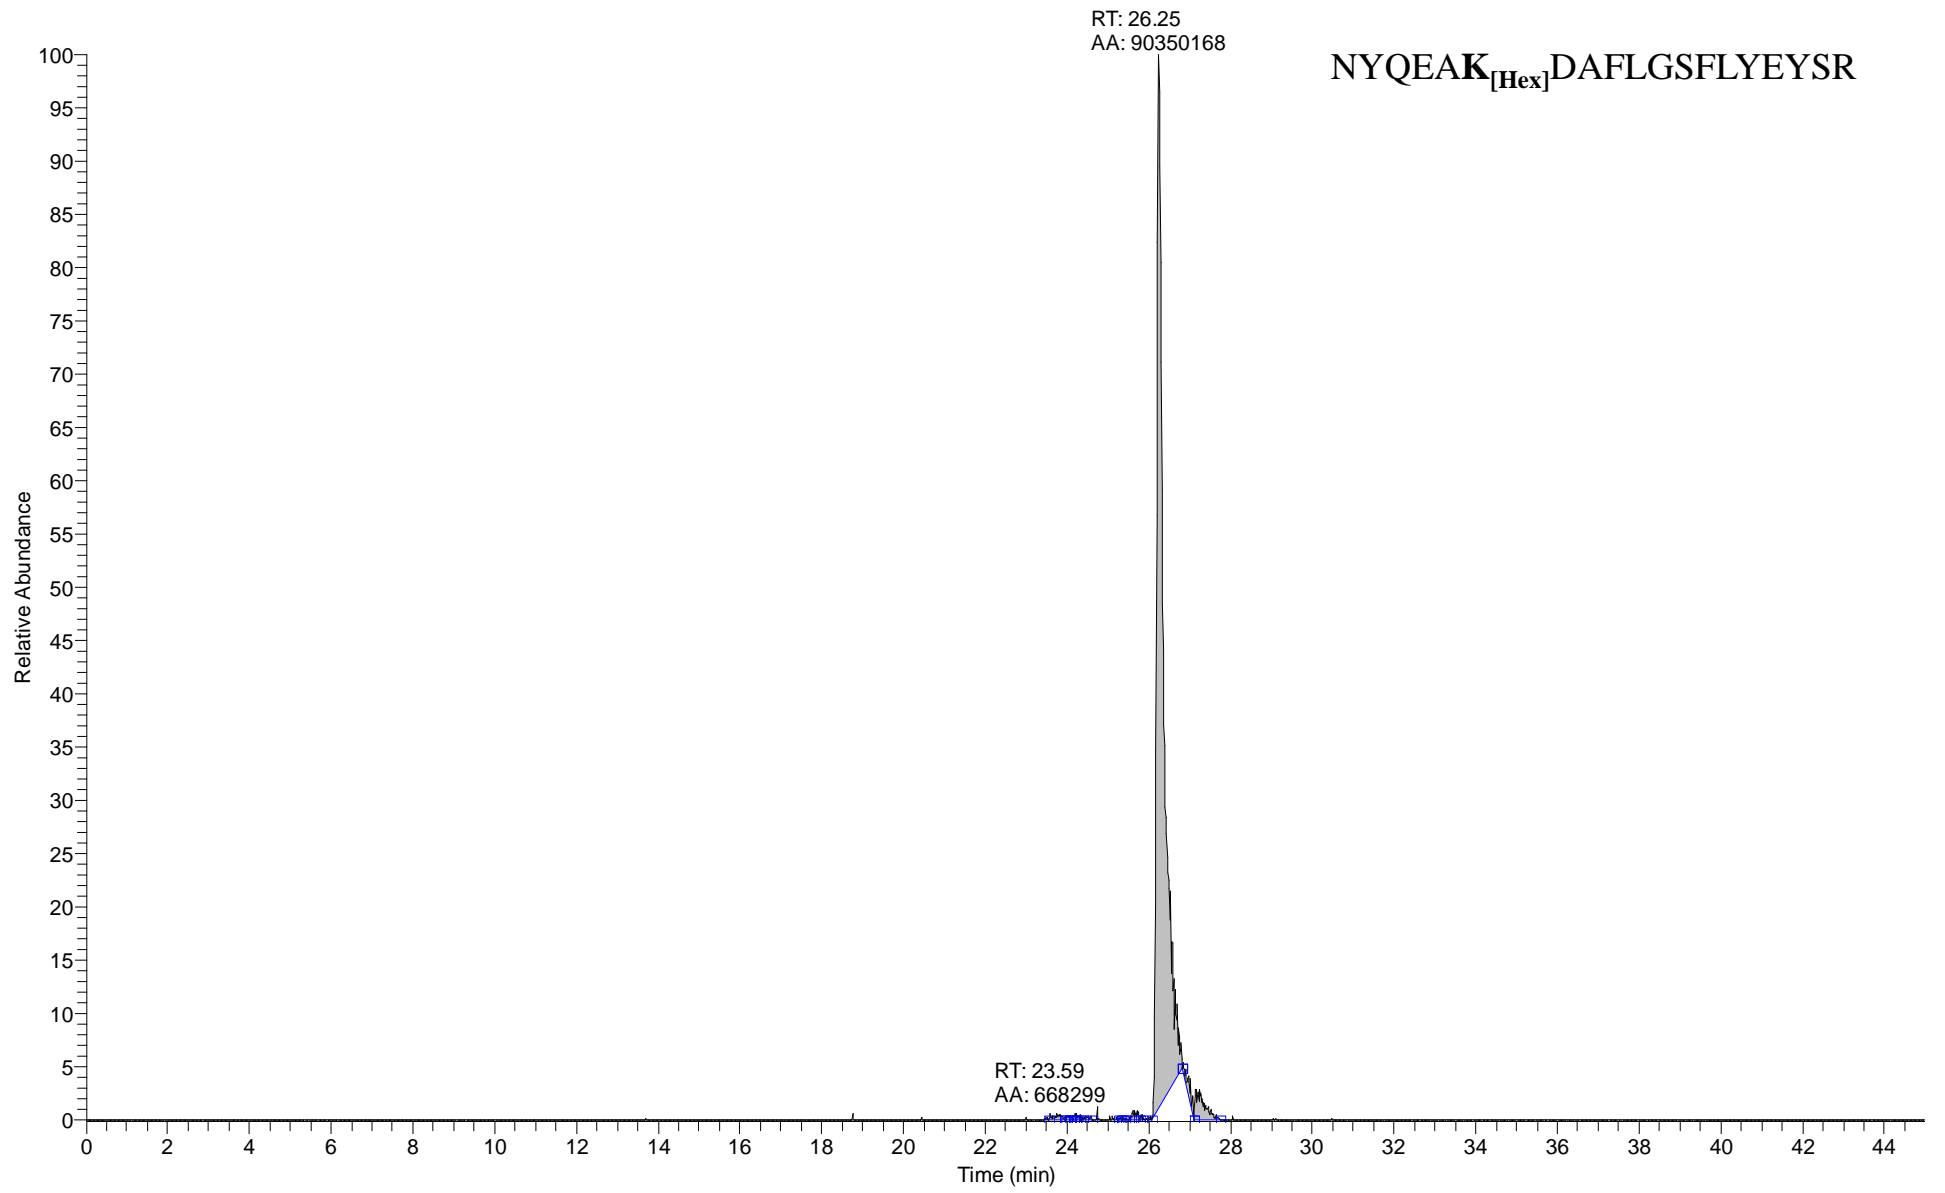

**K<sub>[Hex]</sub>VPQVSTPTLVEVSR**

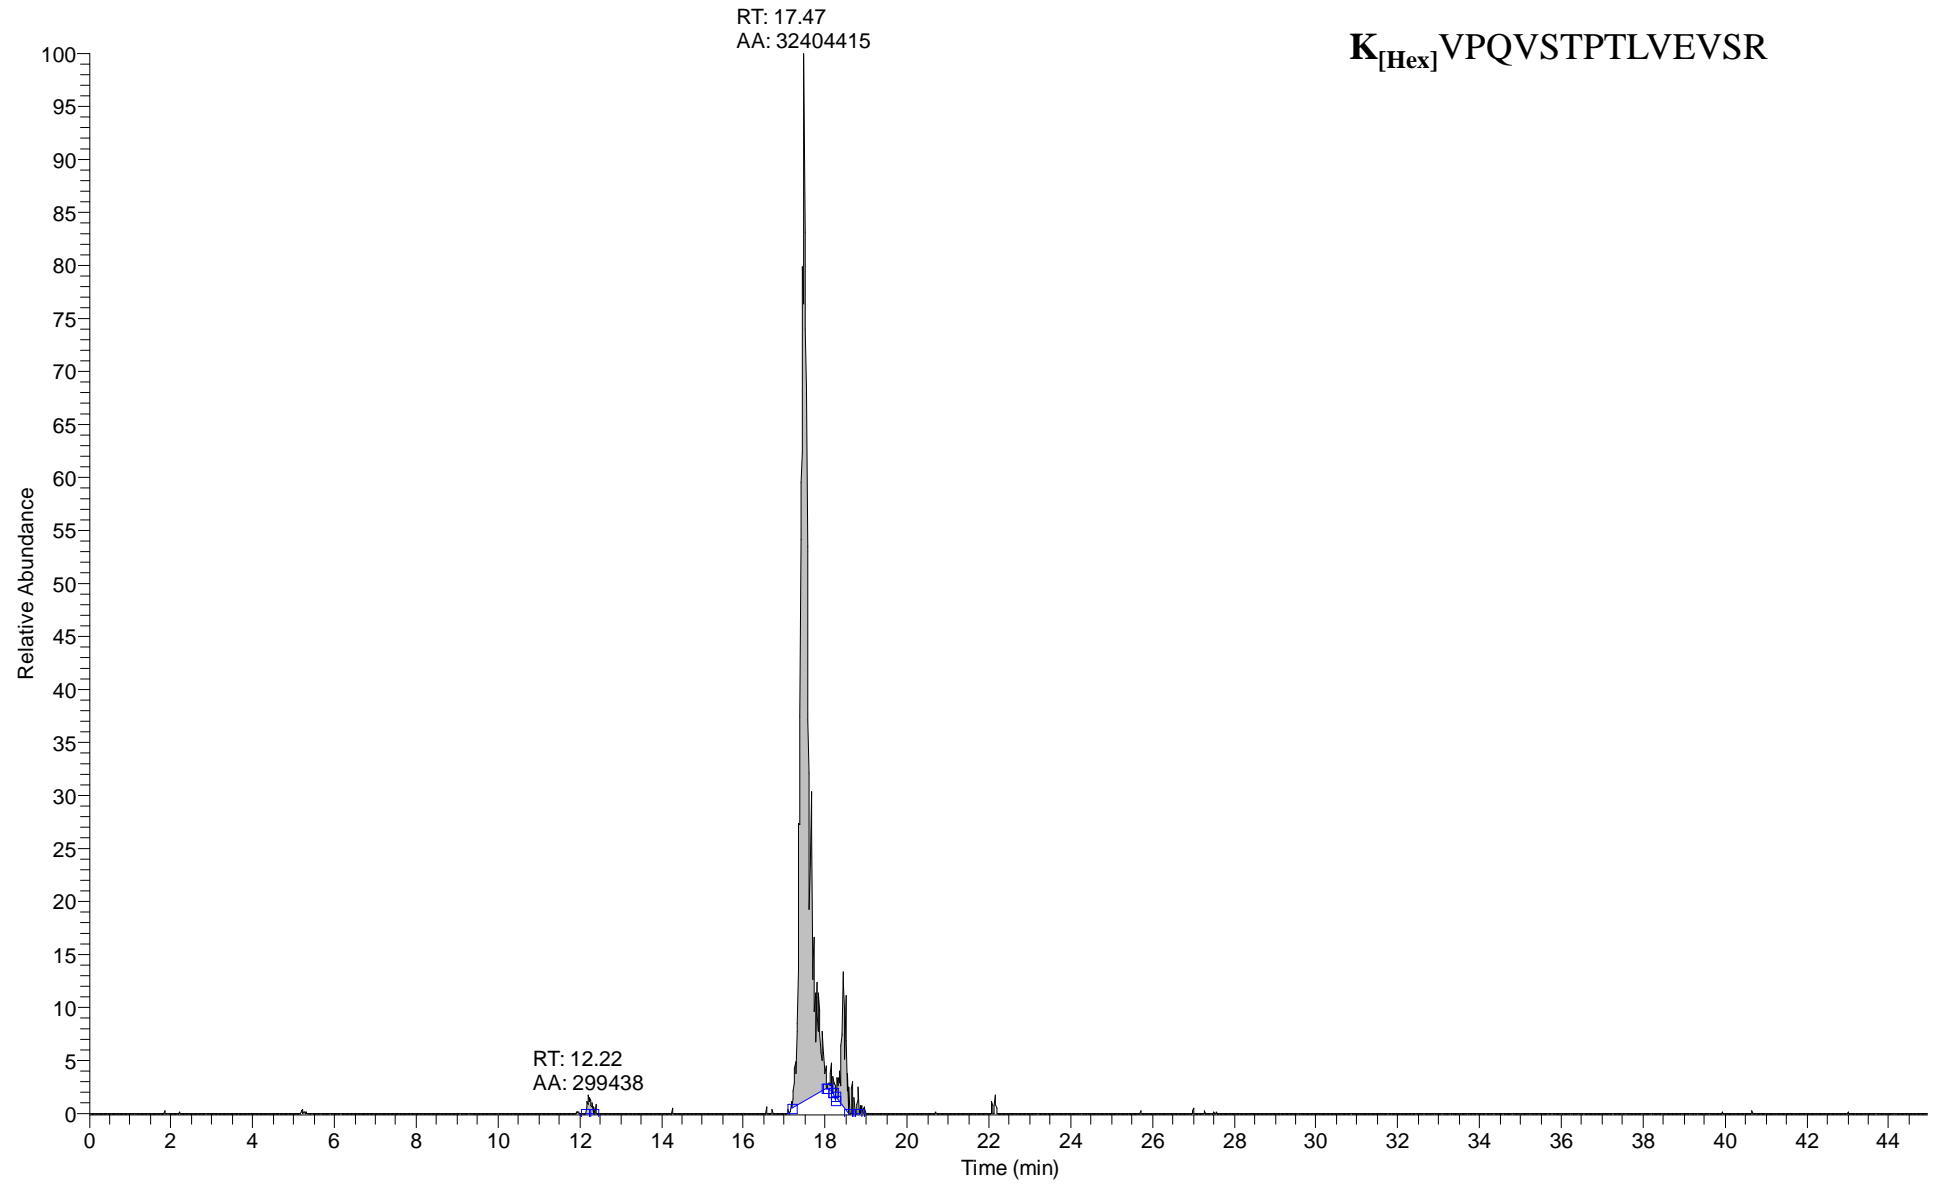

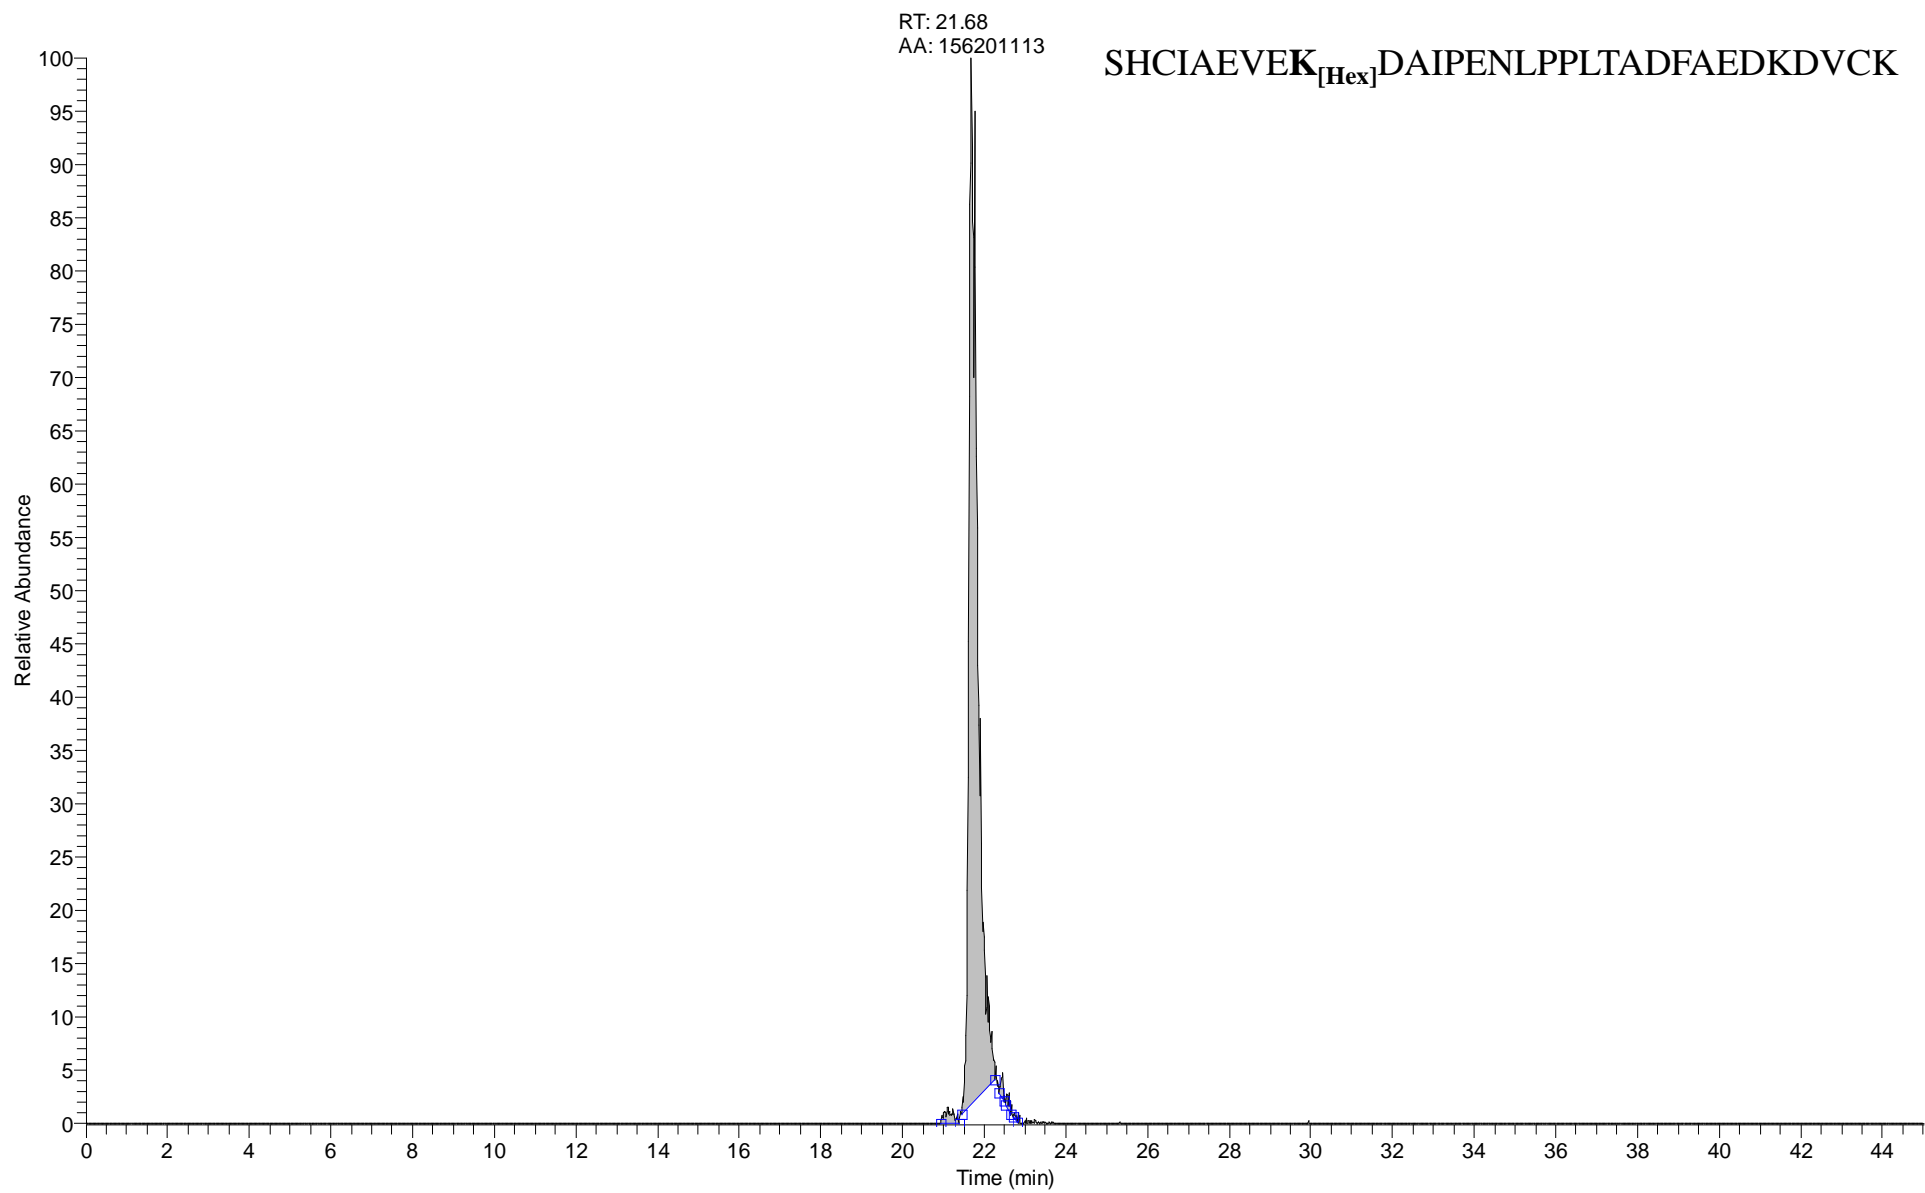

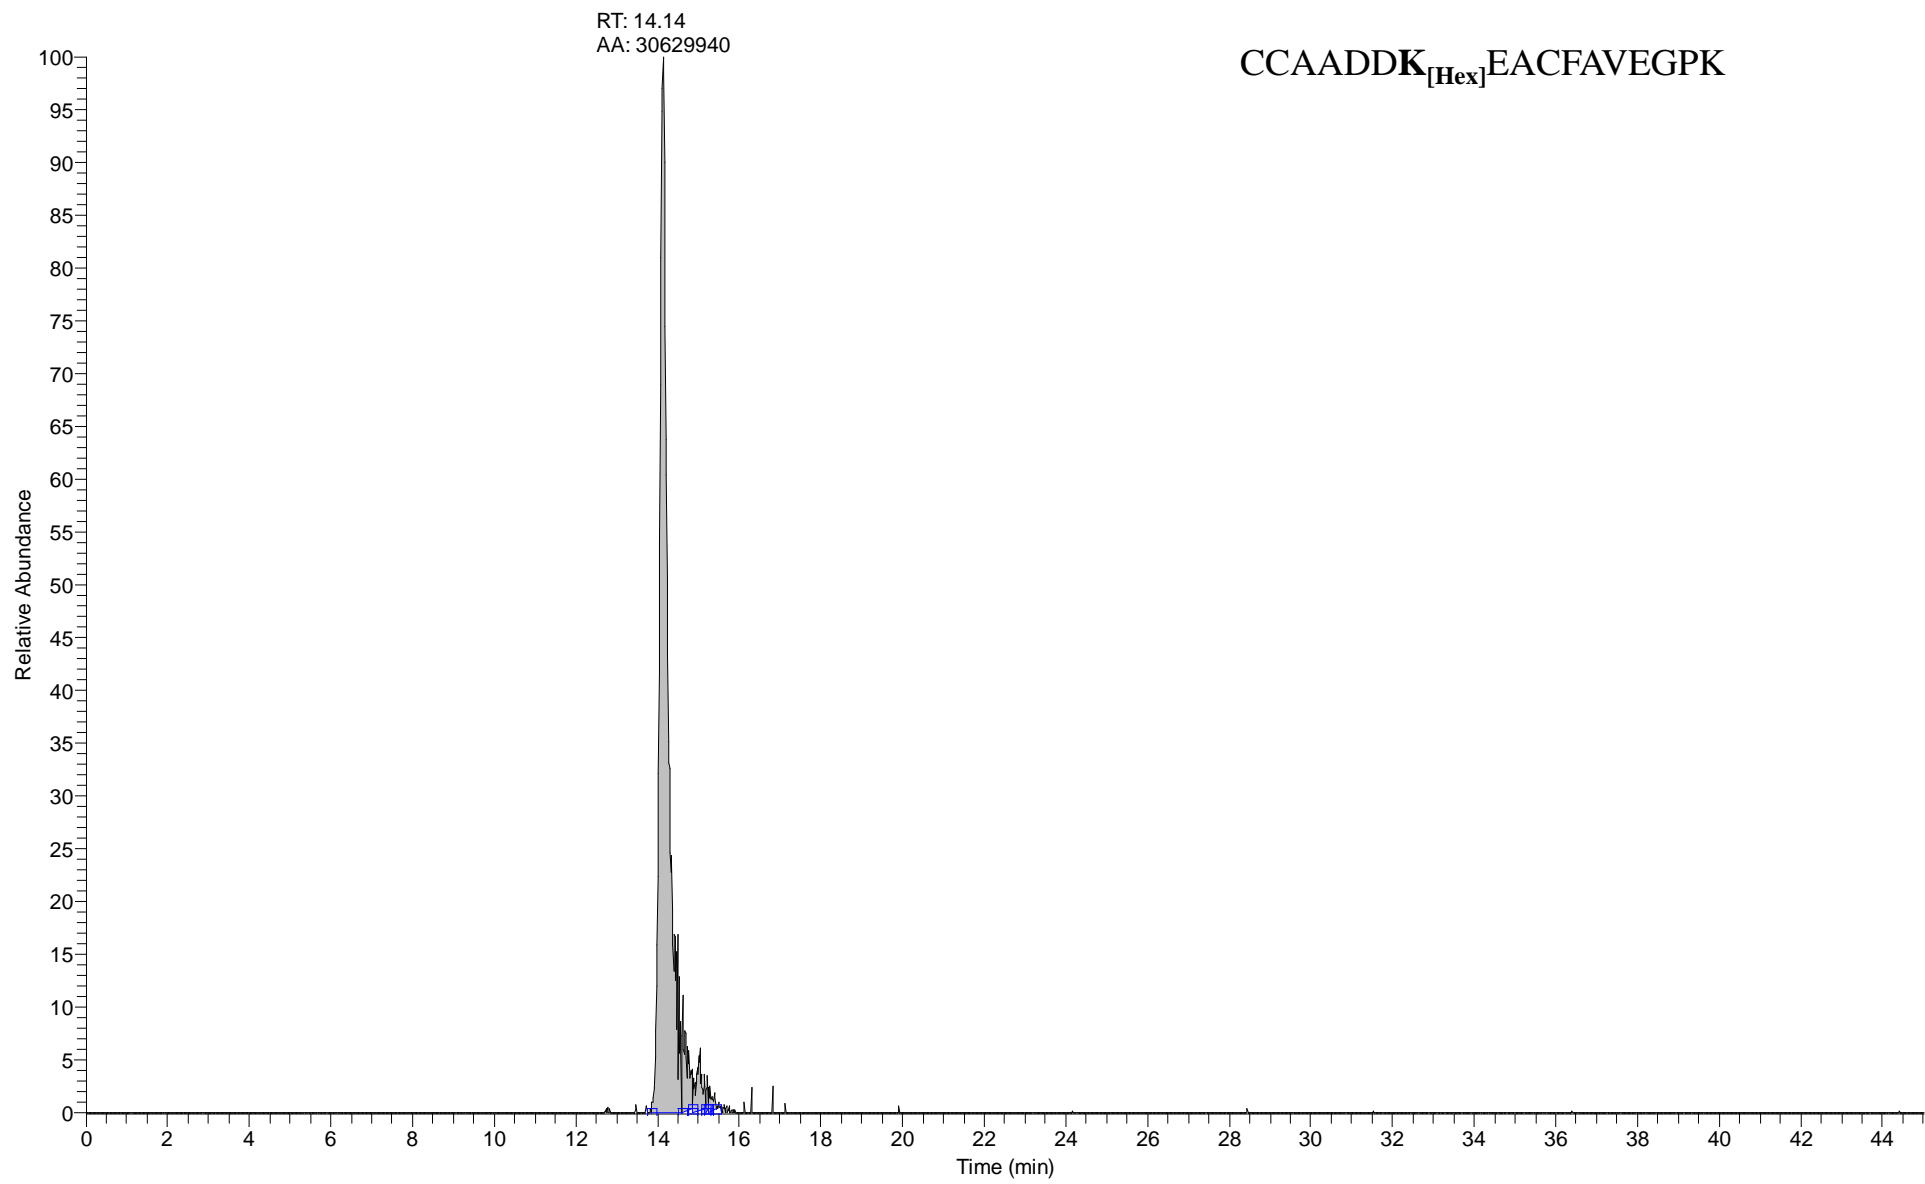



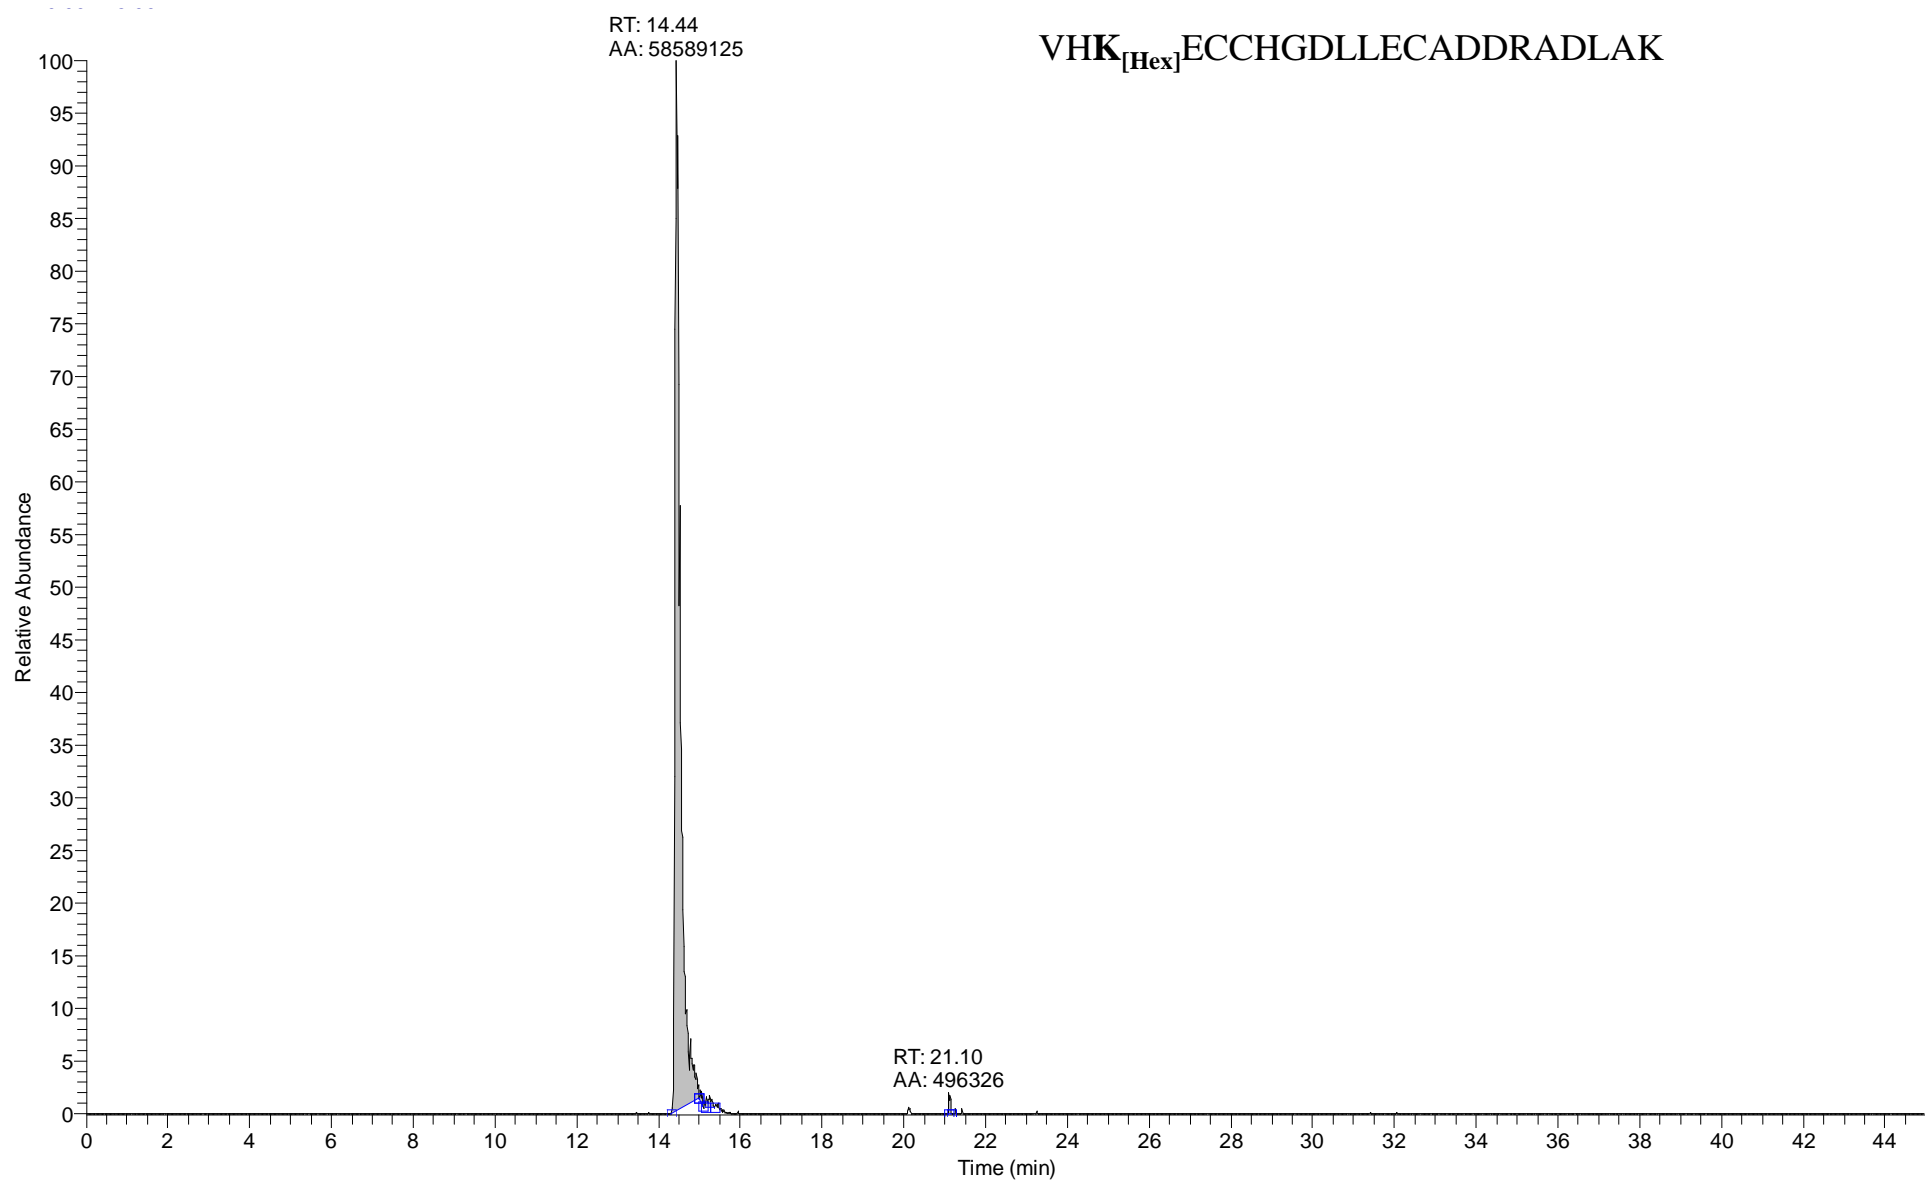

VHK<sub>[Hex]</sub>ECCHGDLLECADDRADLAK

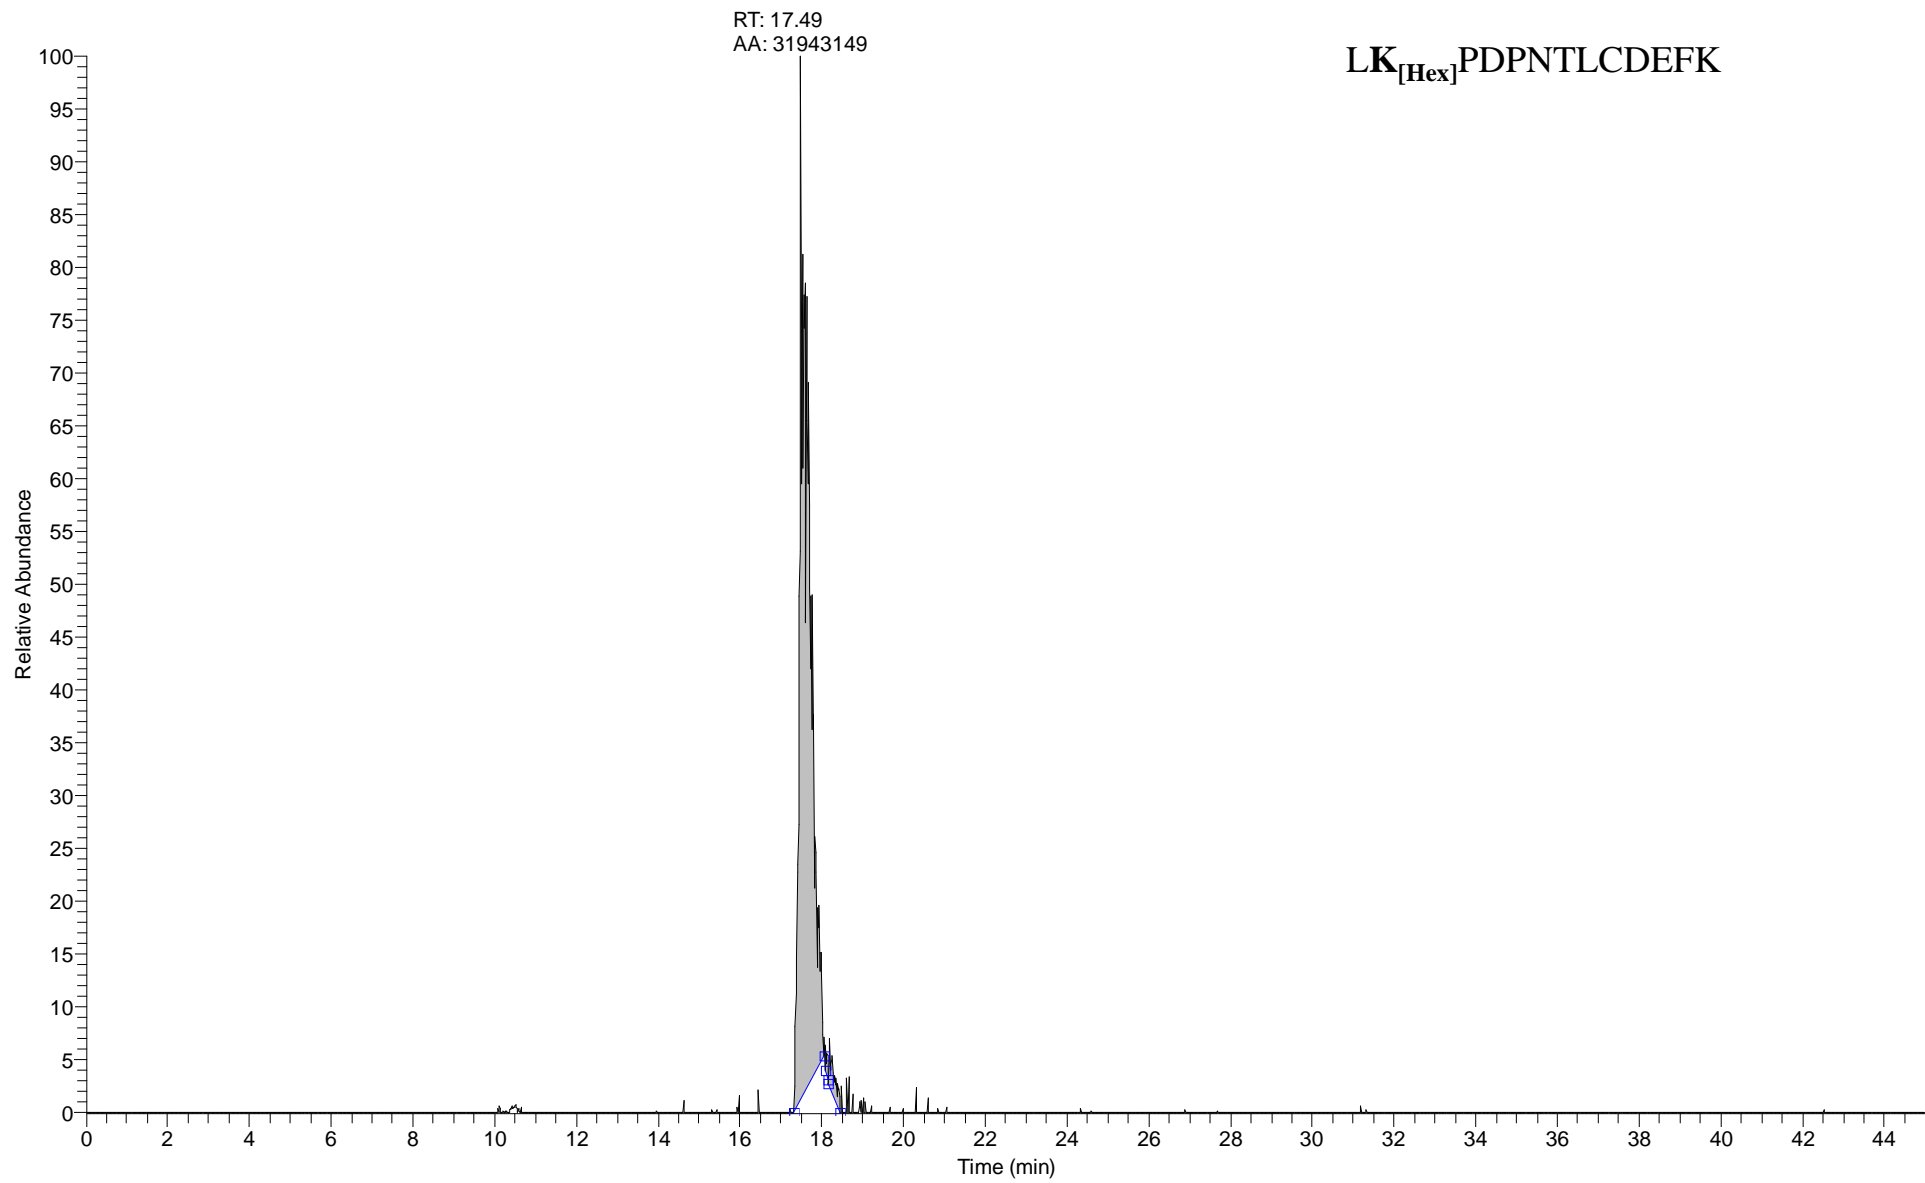

**K<sub>[Hex]</sub>QTALVELLK**

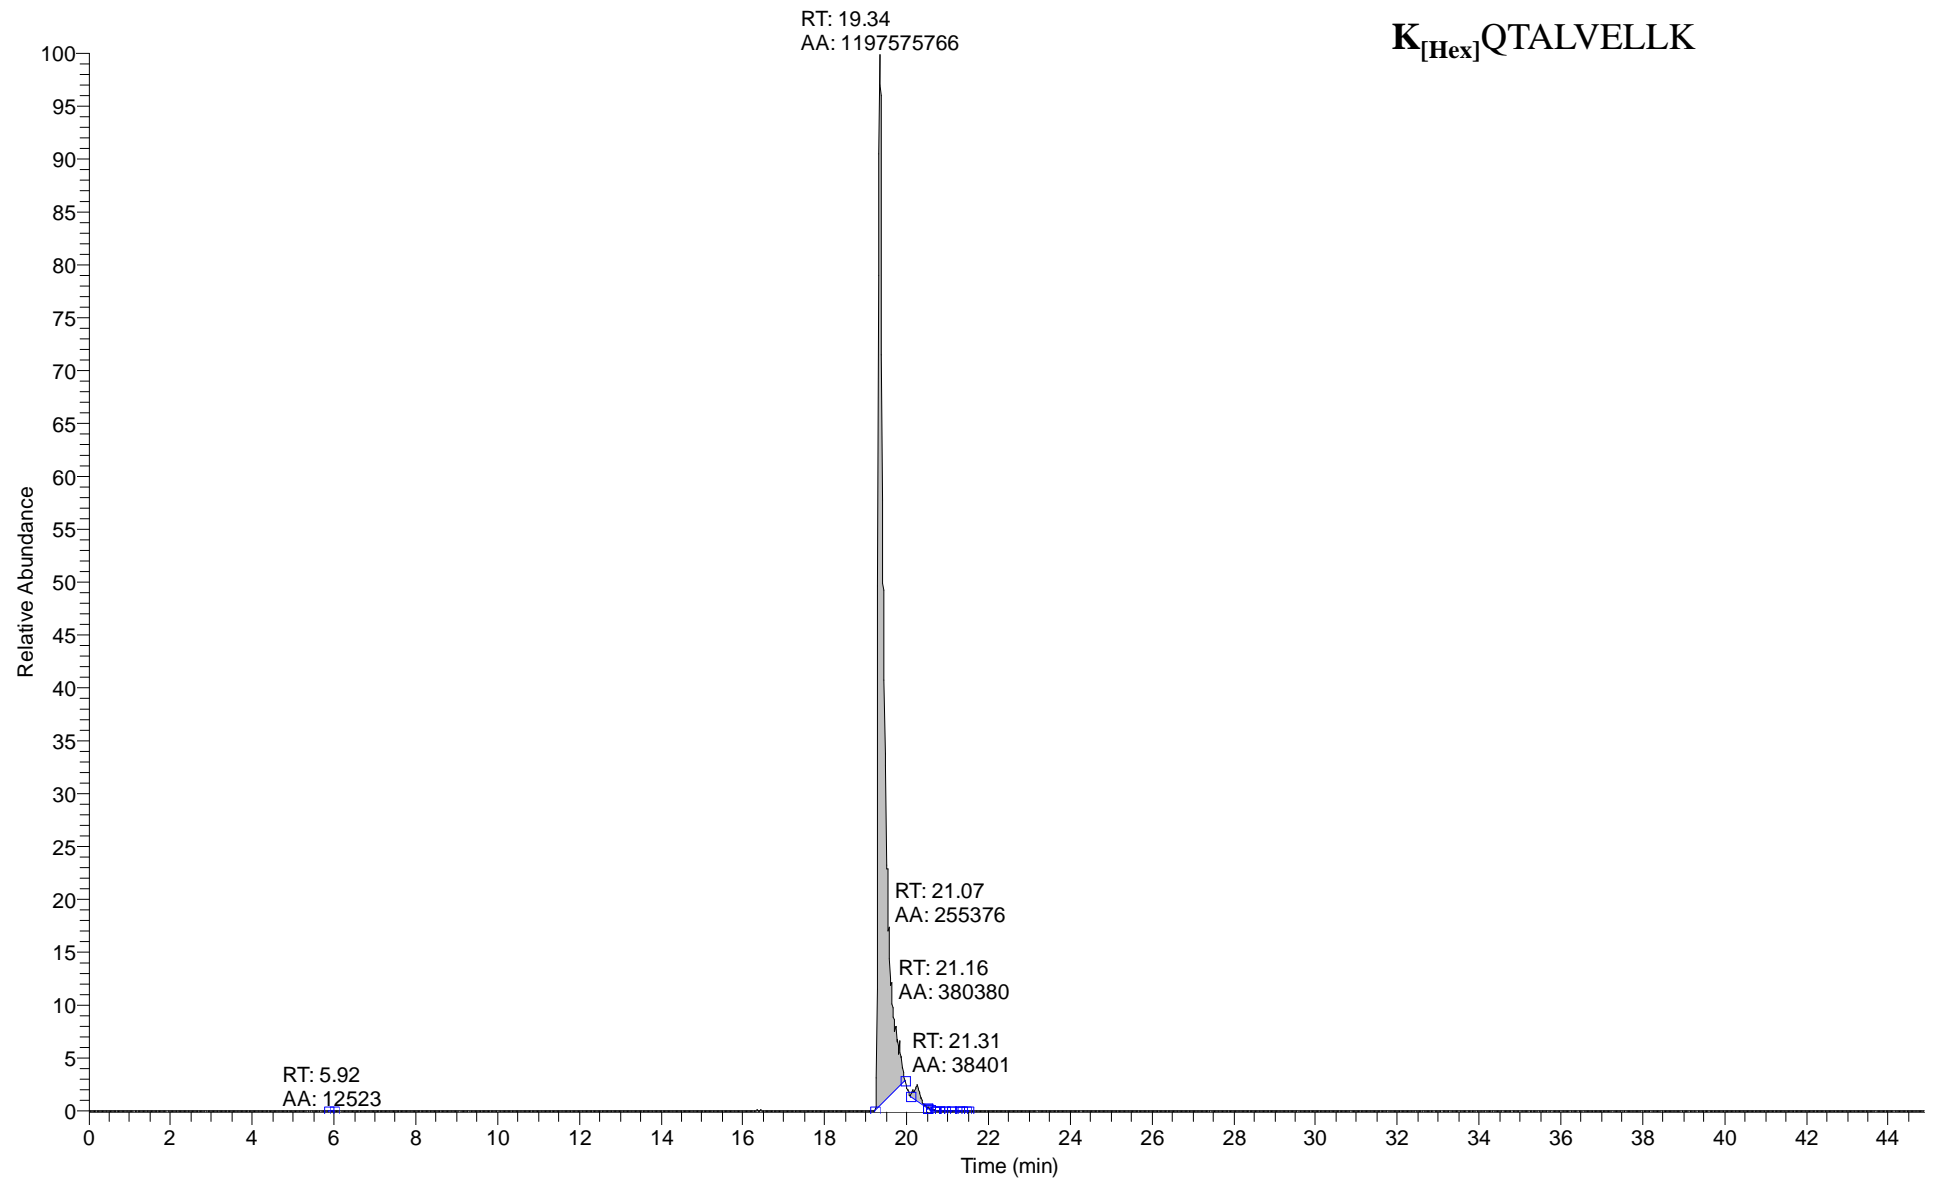

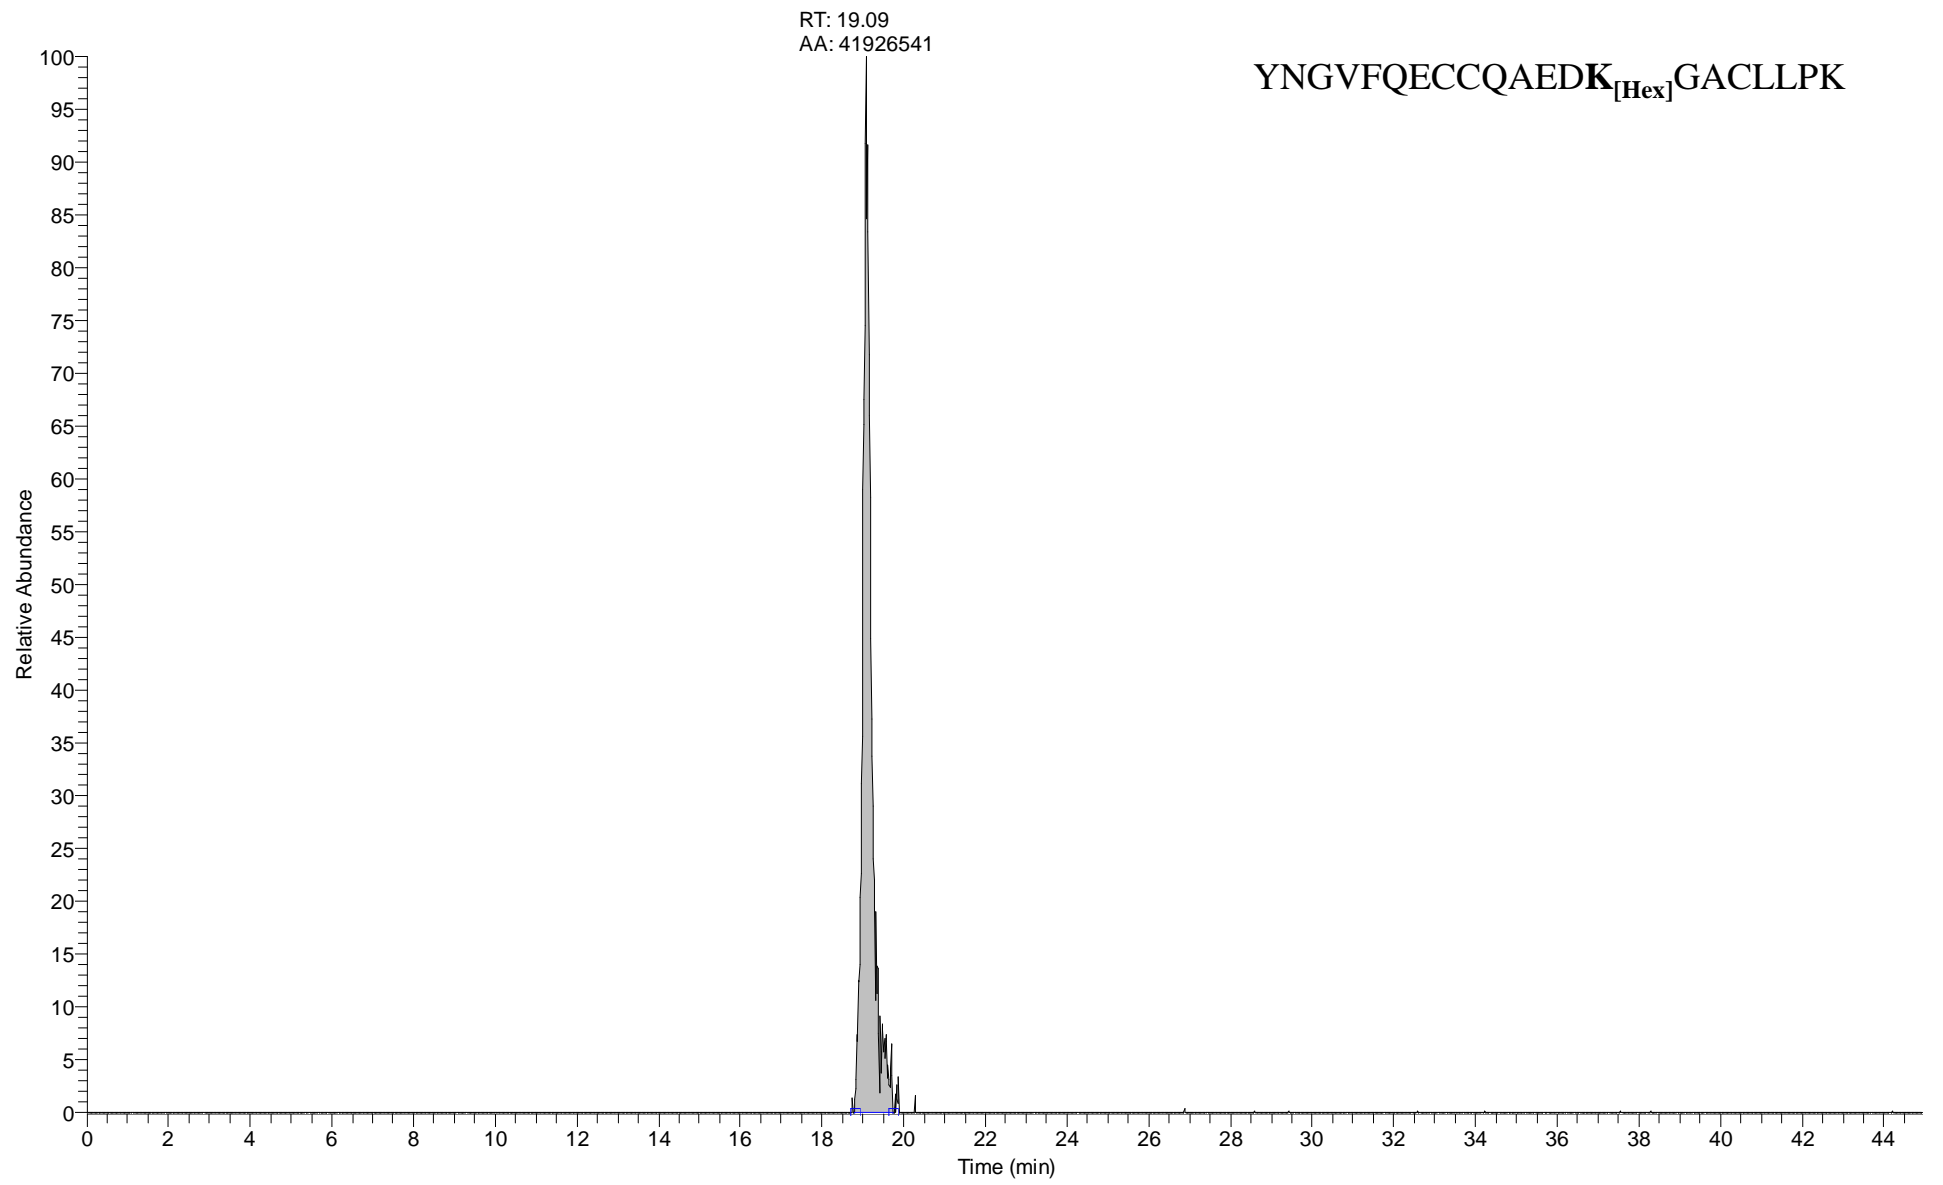

ECCDK<sub>[Hex]</sub>PLLEK

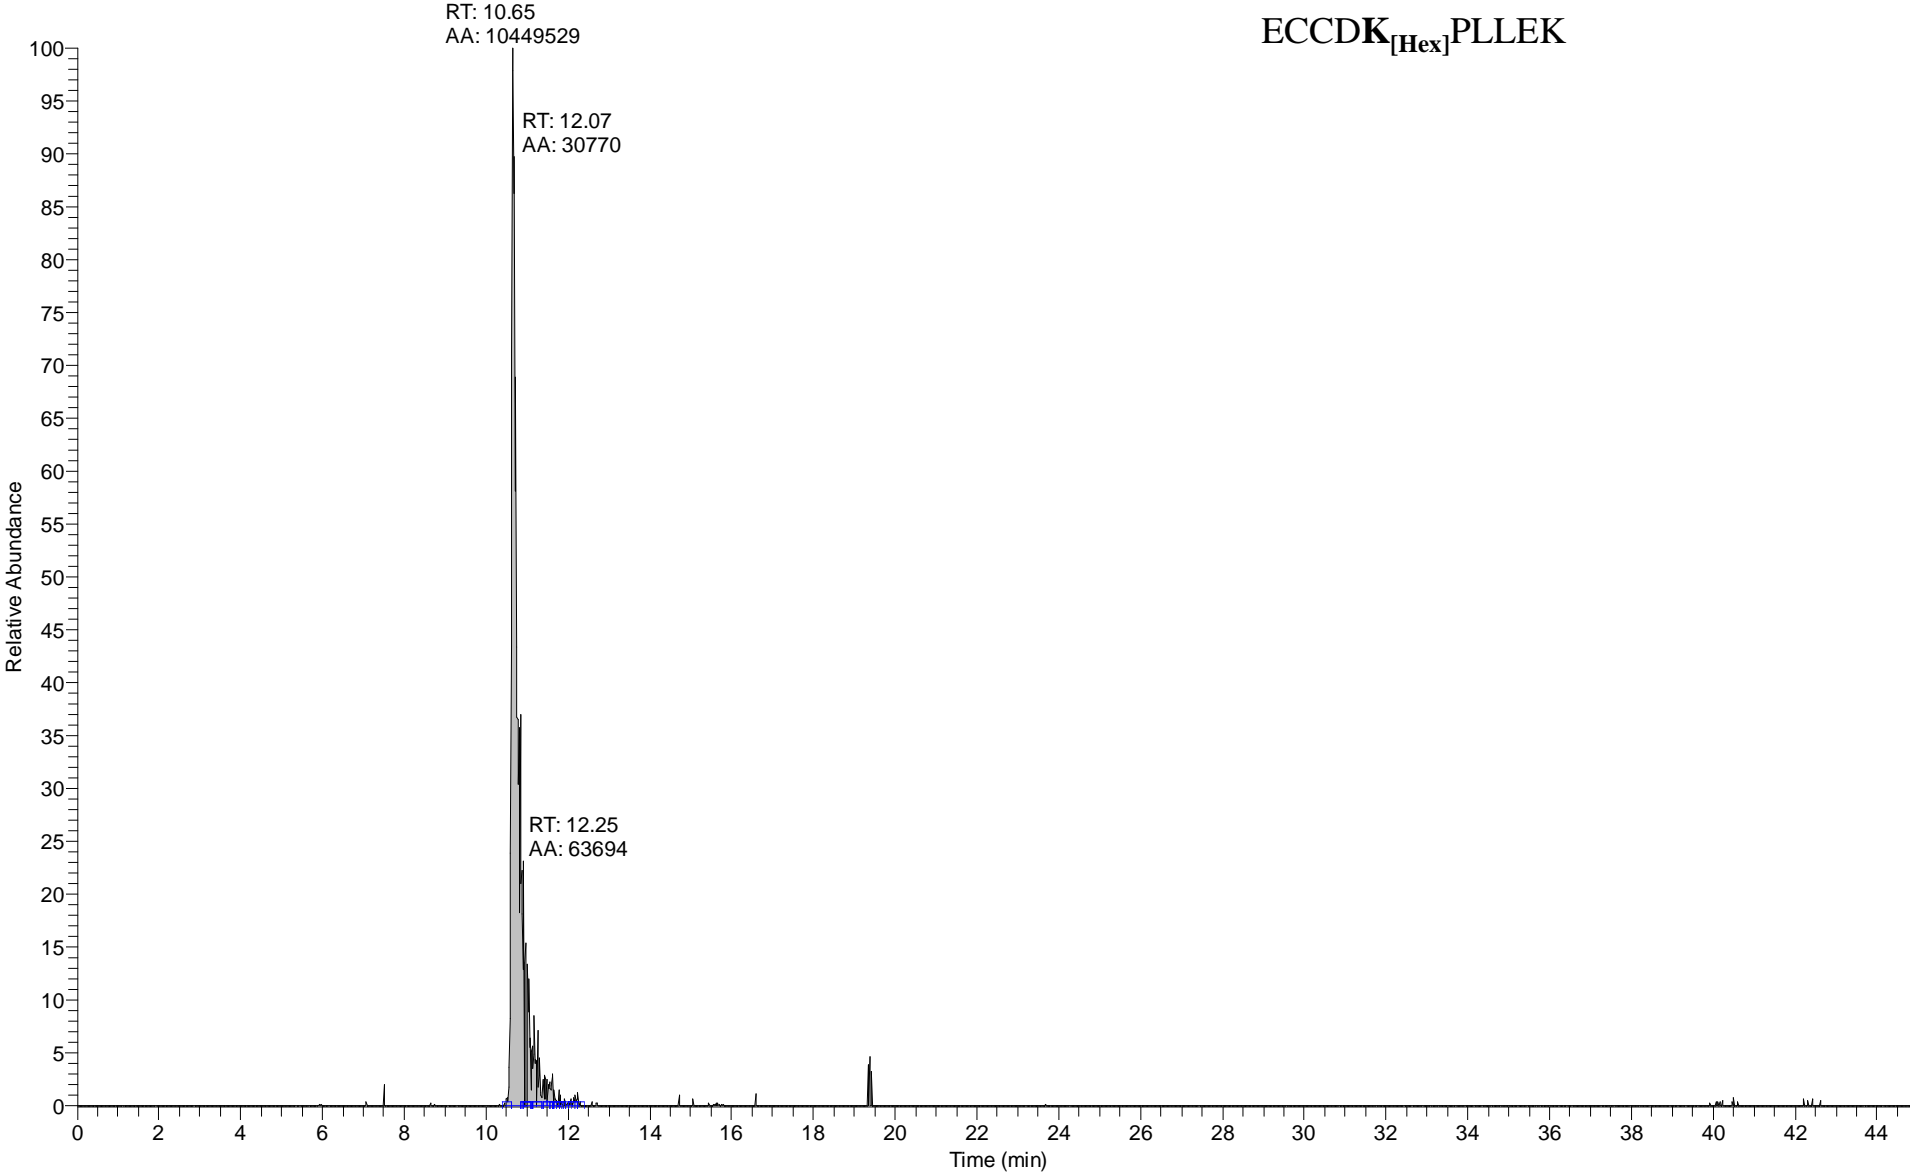

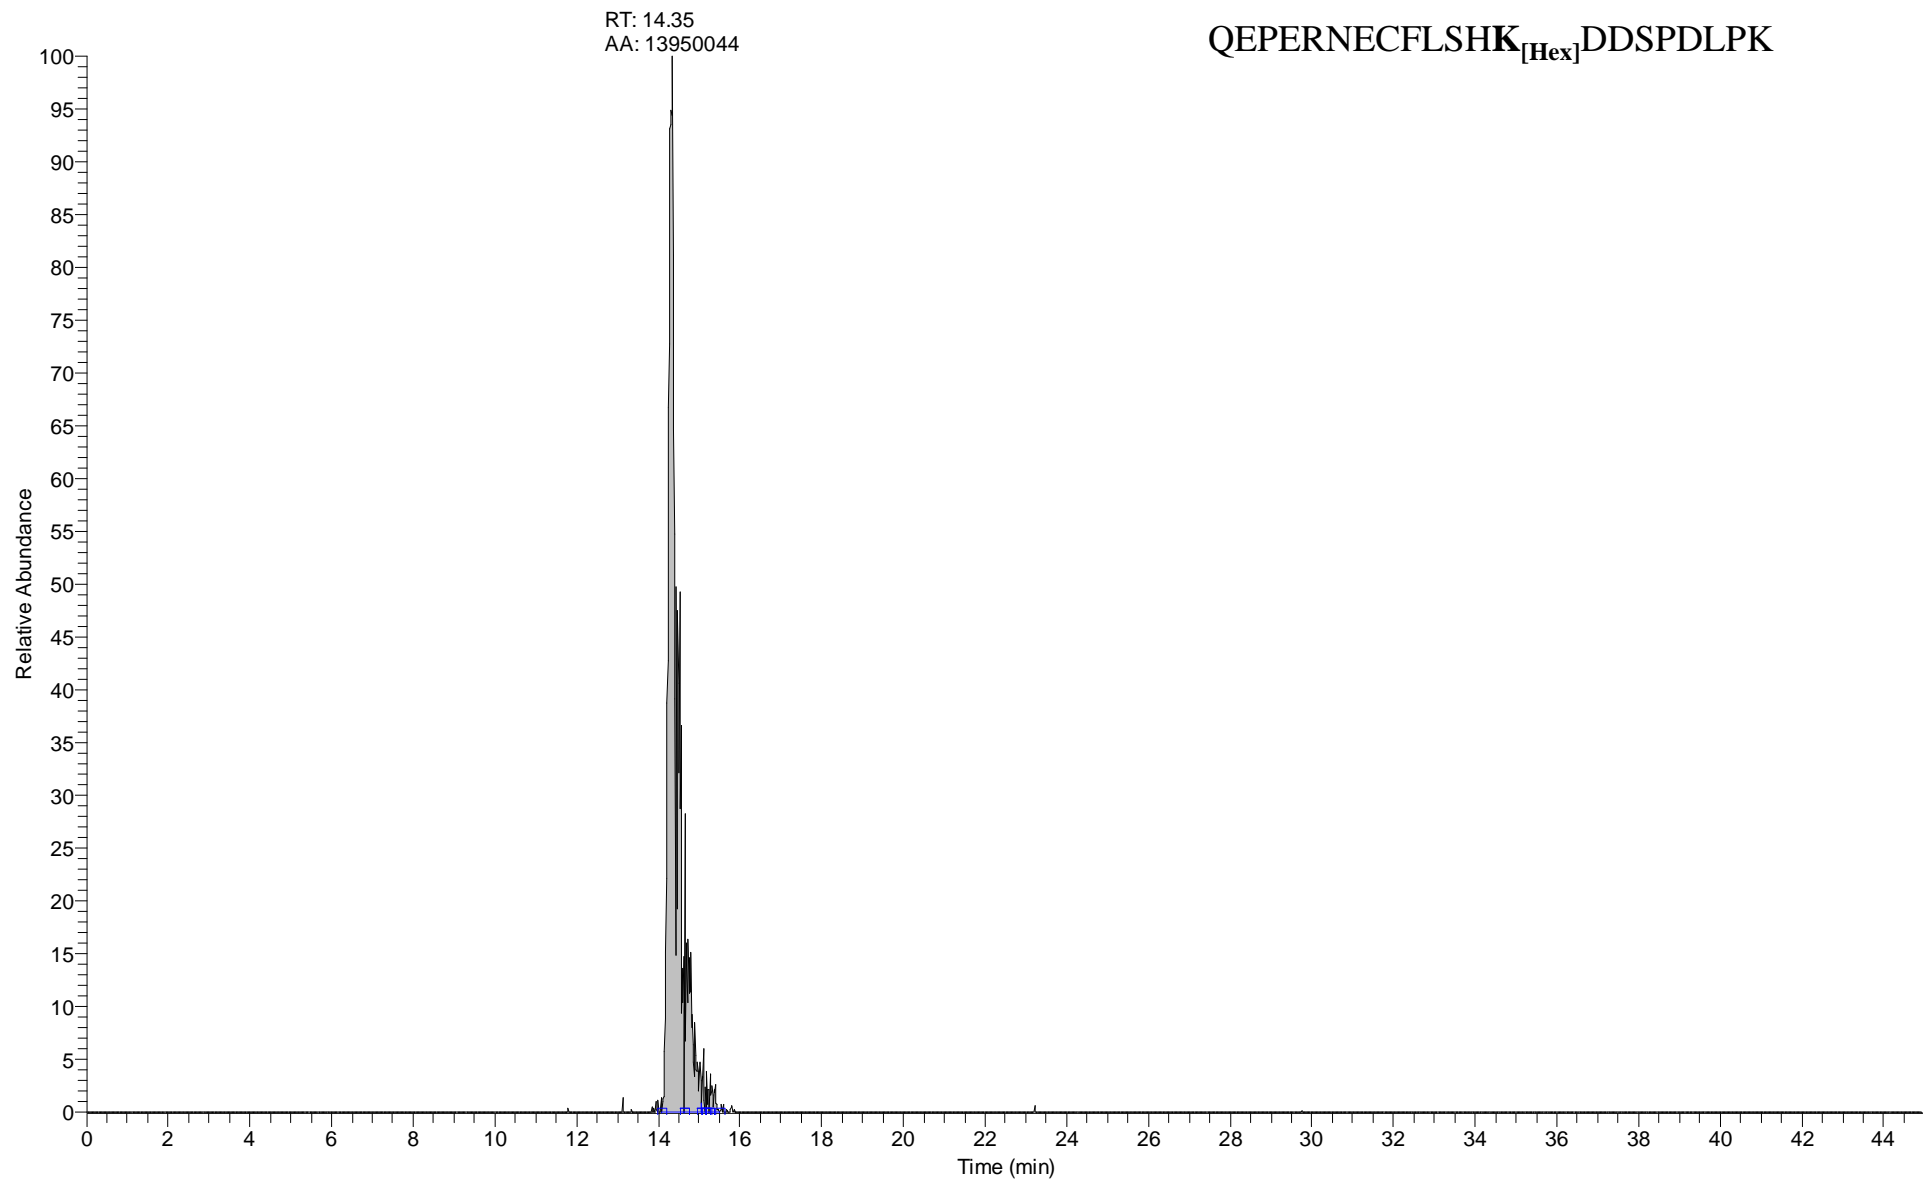

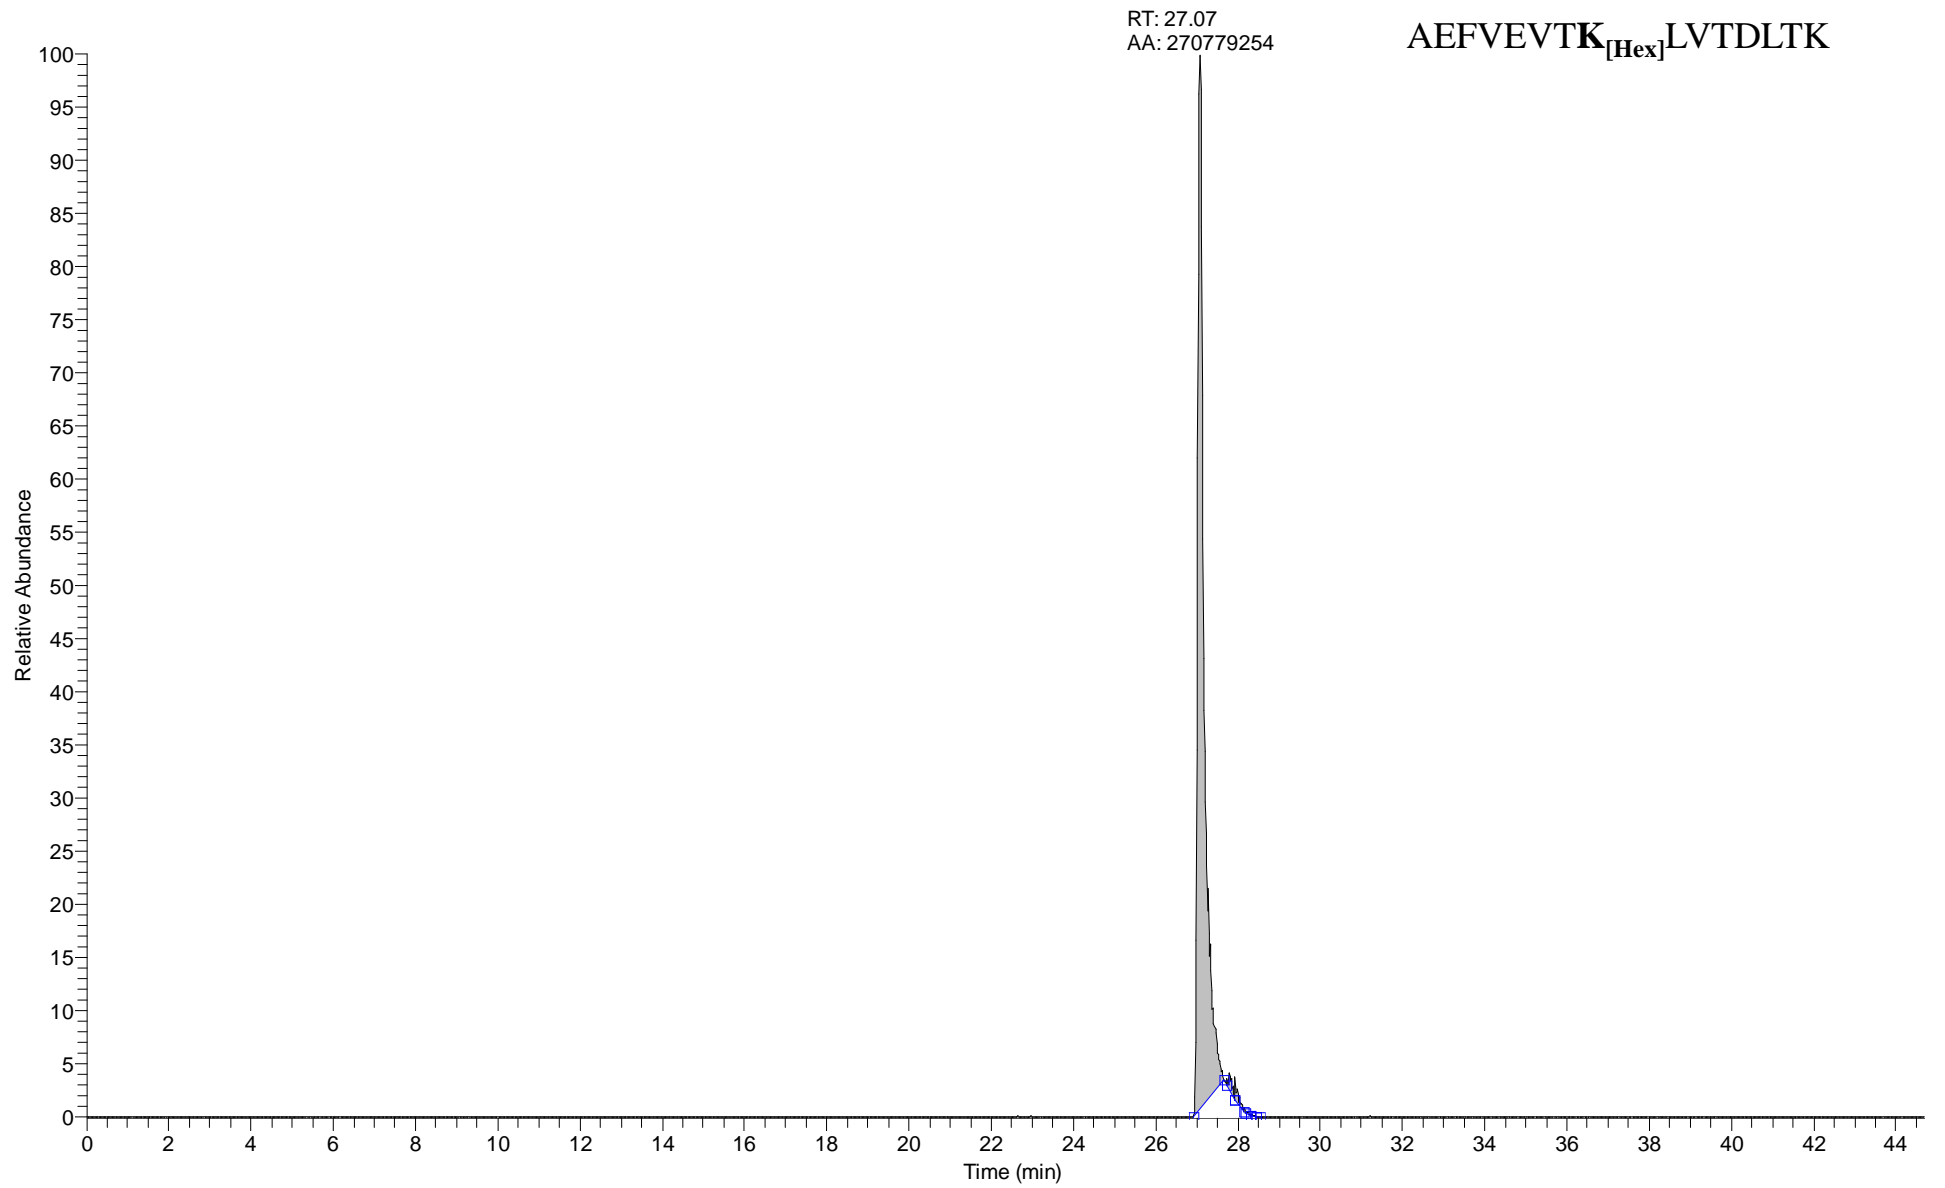

LAK<sub>[Hex]</sub>EYEATLEECCA

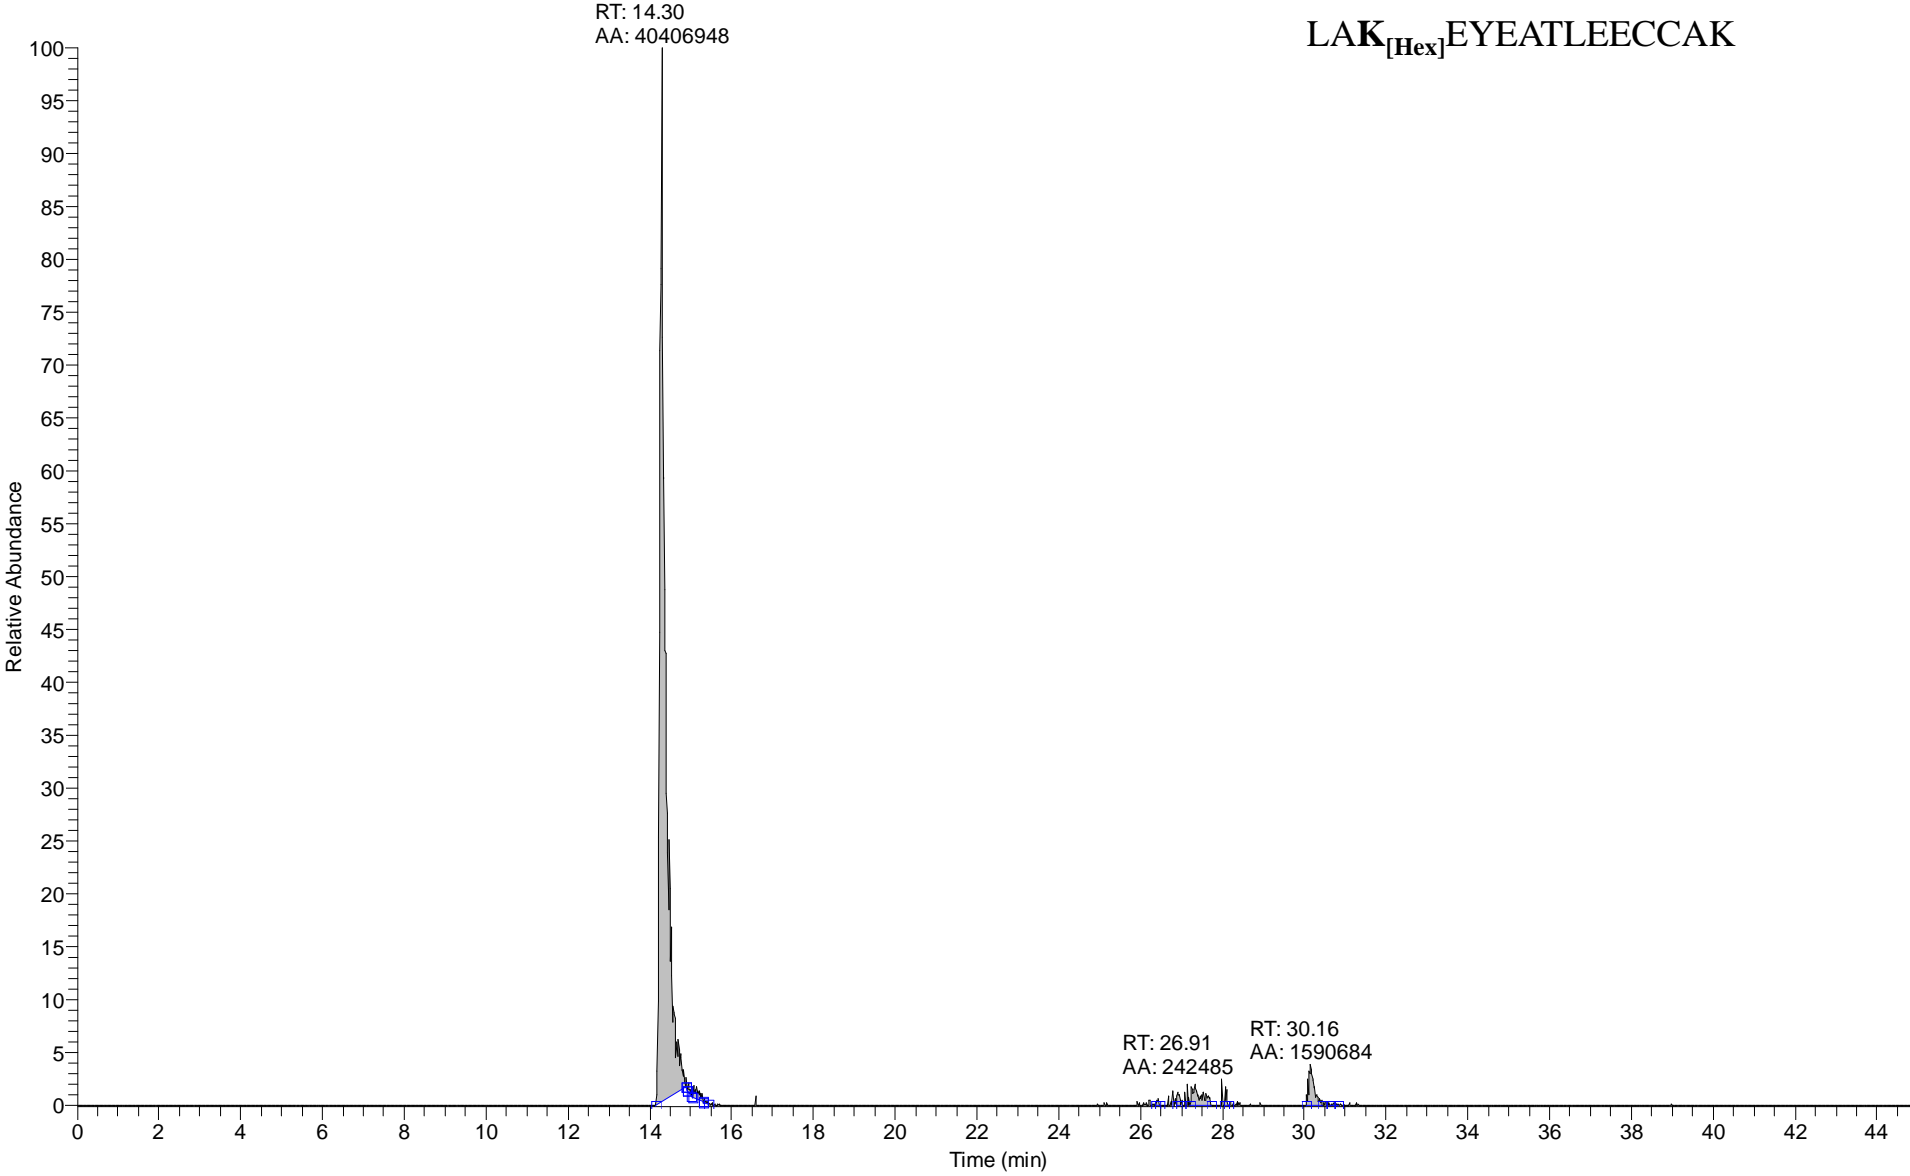



RHPYFYAPELLYYANK [Hex] YNGVFQECCQAEDK

RT: 25.08  
AA: 54397071

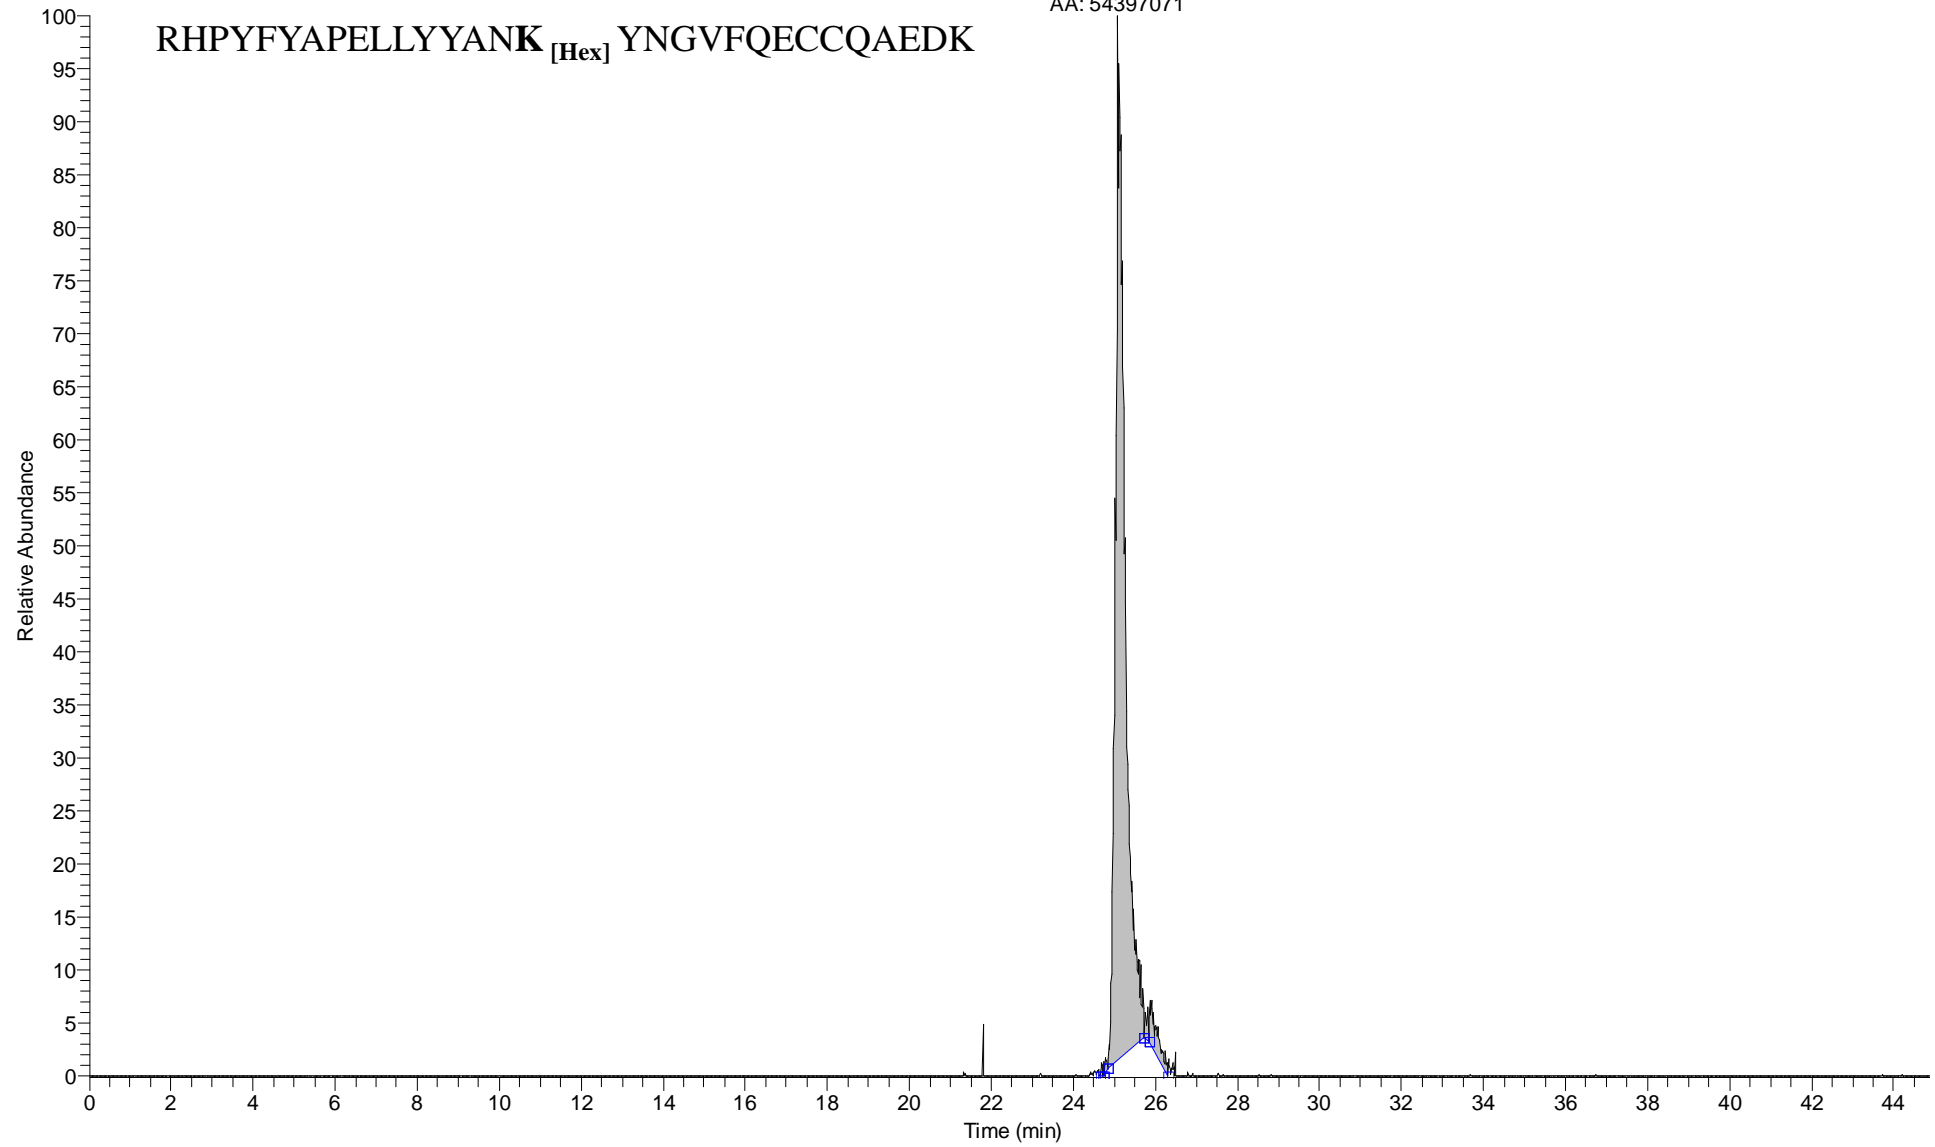

TVMENFVAFVDK [Hex] CCAADDKEACFAVEGPK

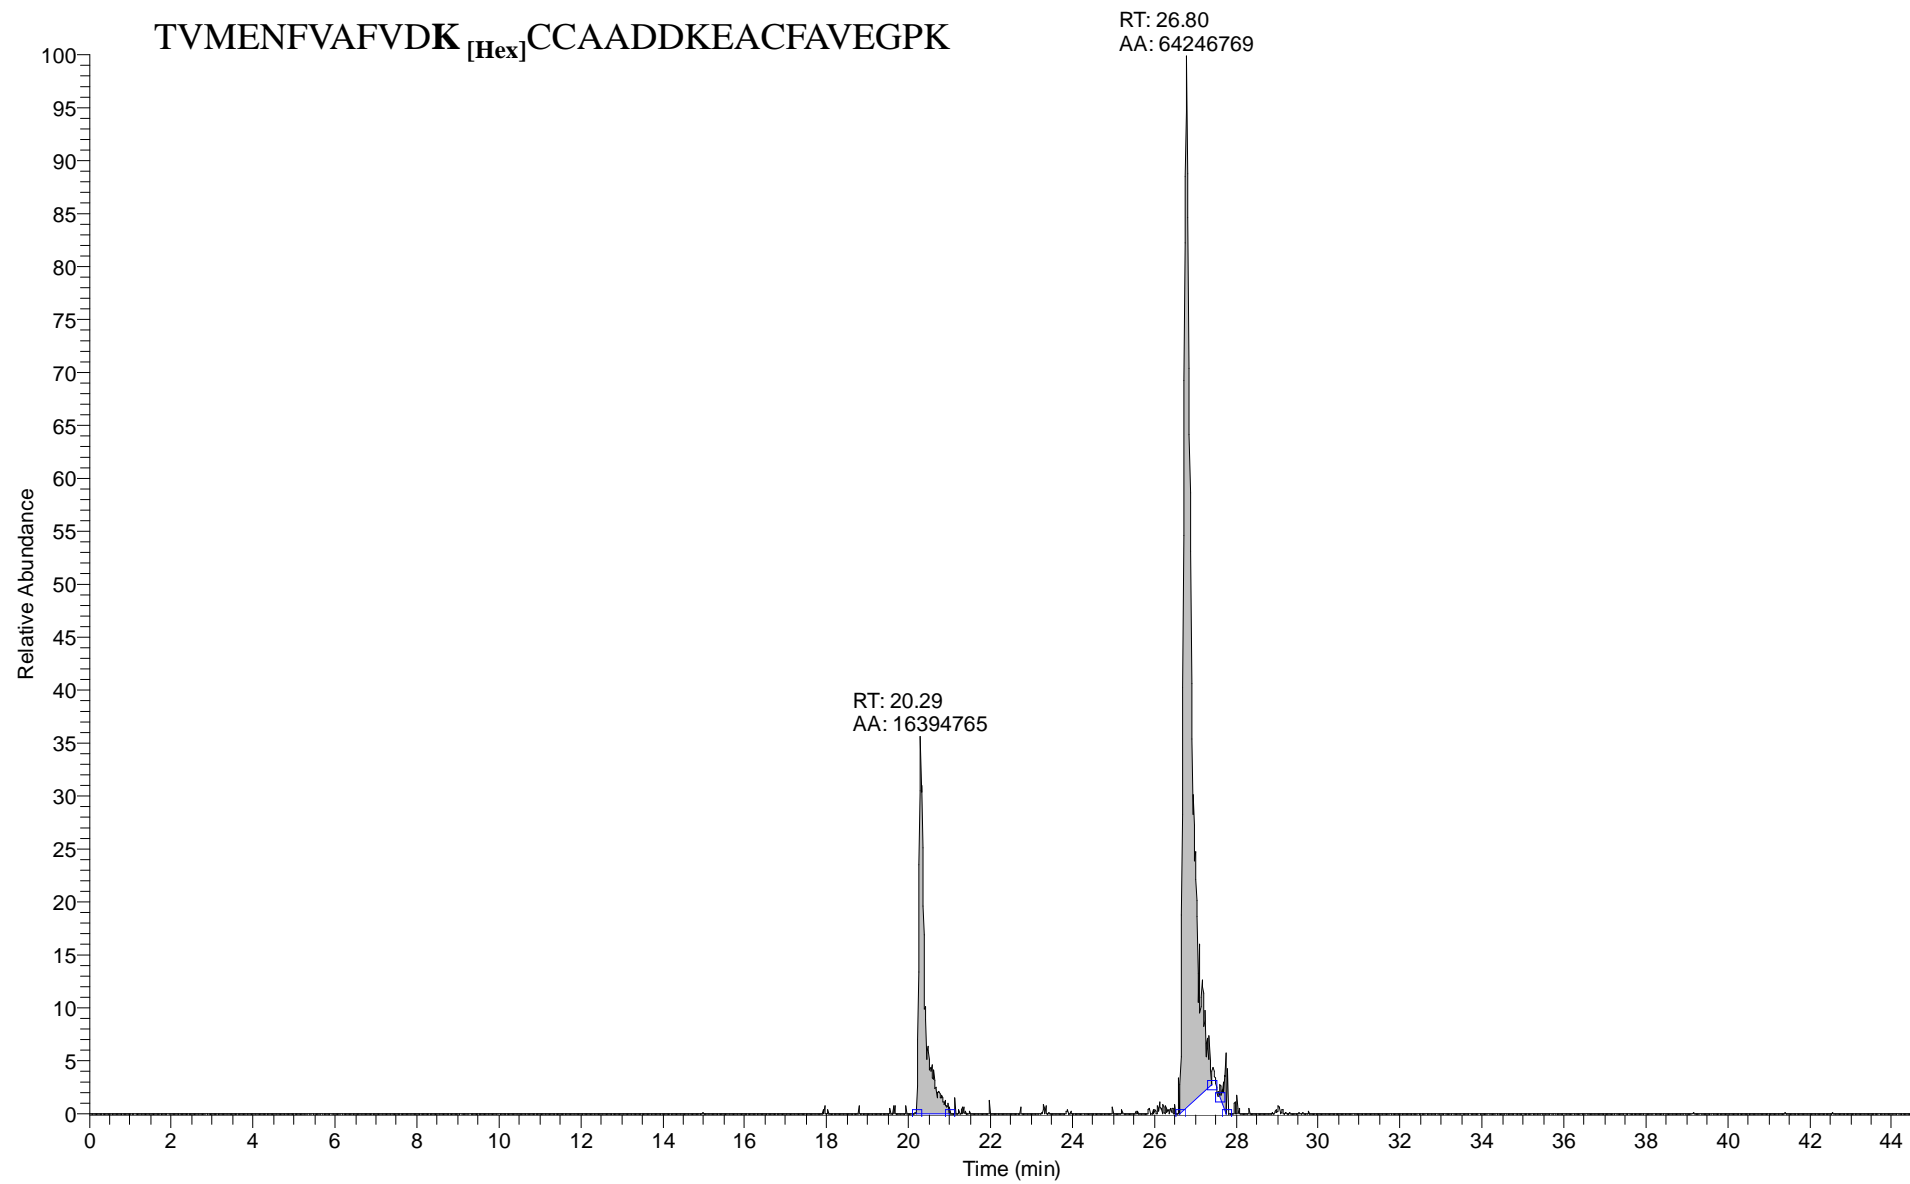

RT: 26.80  
AA: 64246769

RT: 20.29  
AA: 16394765

DTHK<sub>[Hex]</sub>SEIAHR

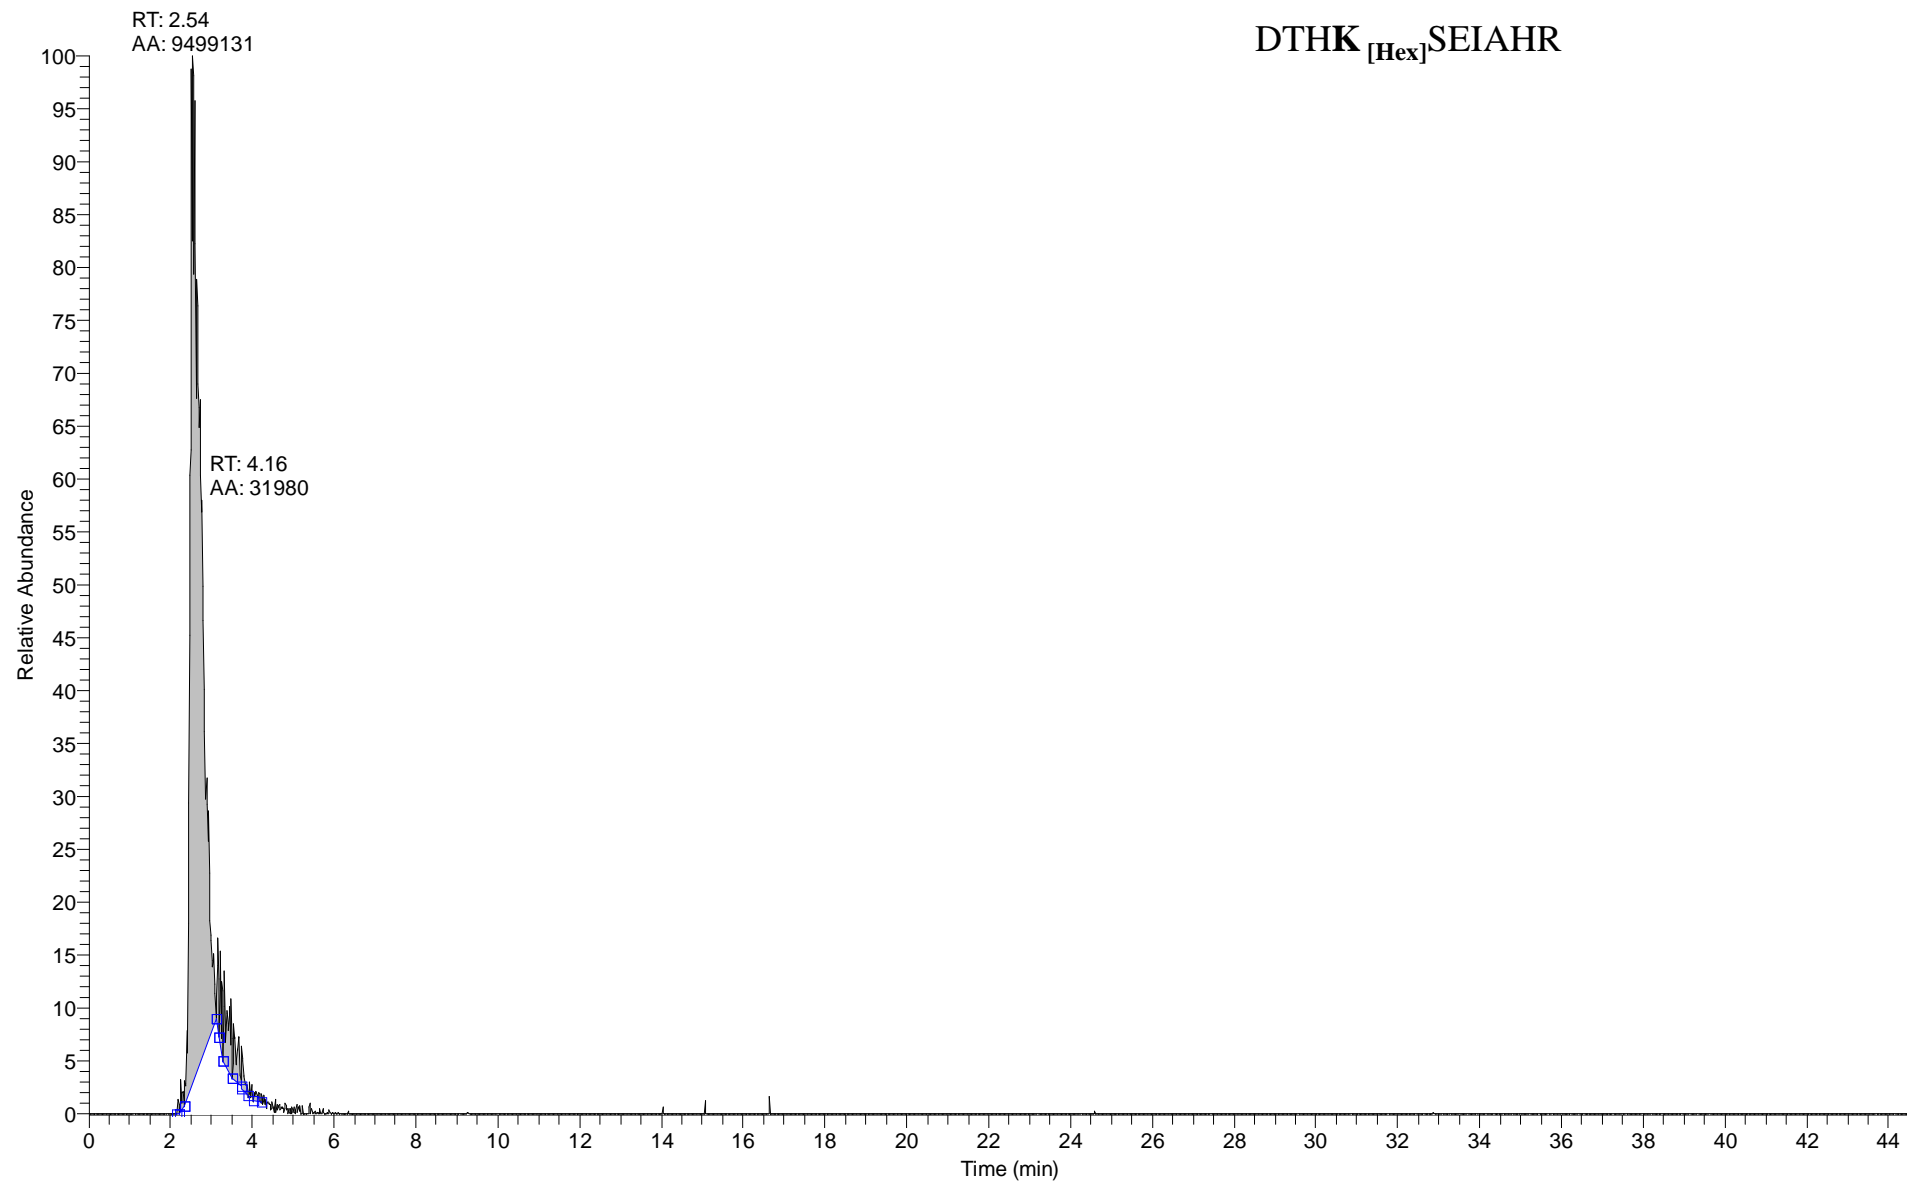

EYEATLEECCA**K** [Hex]DDPHACYSTVFDK

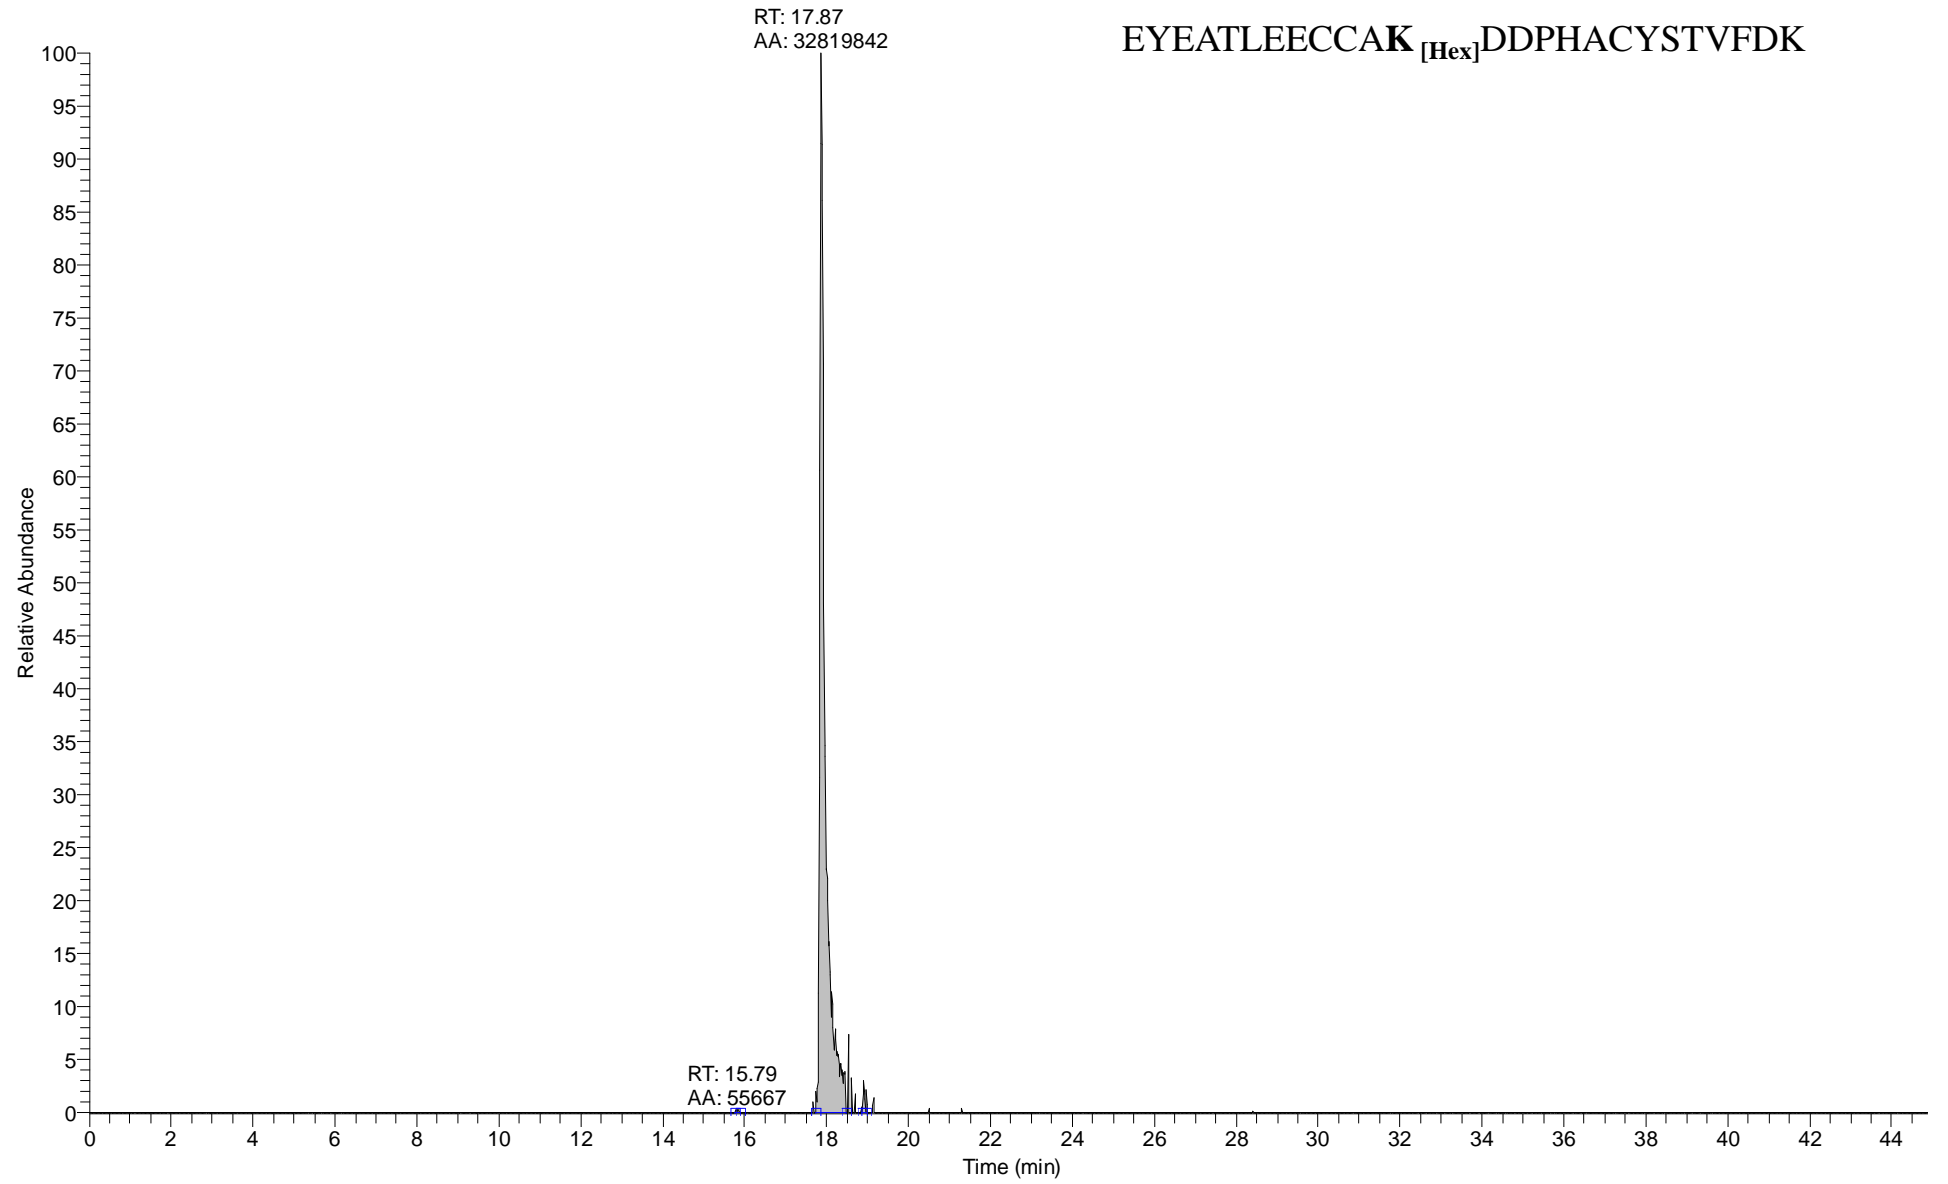

FK<sub>[Hex]</sub>DLGEEHFK

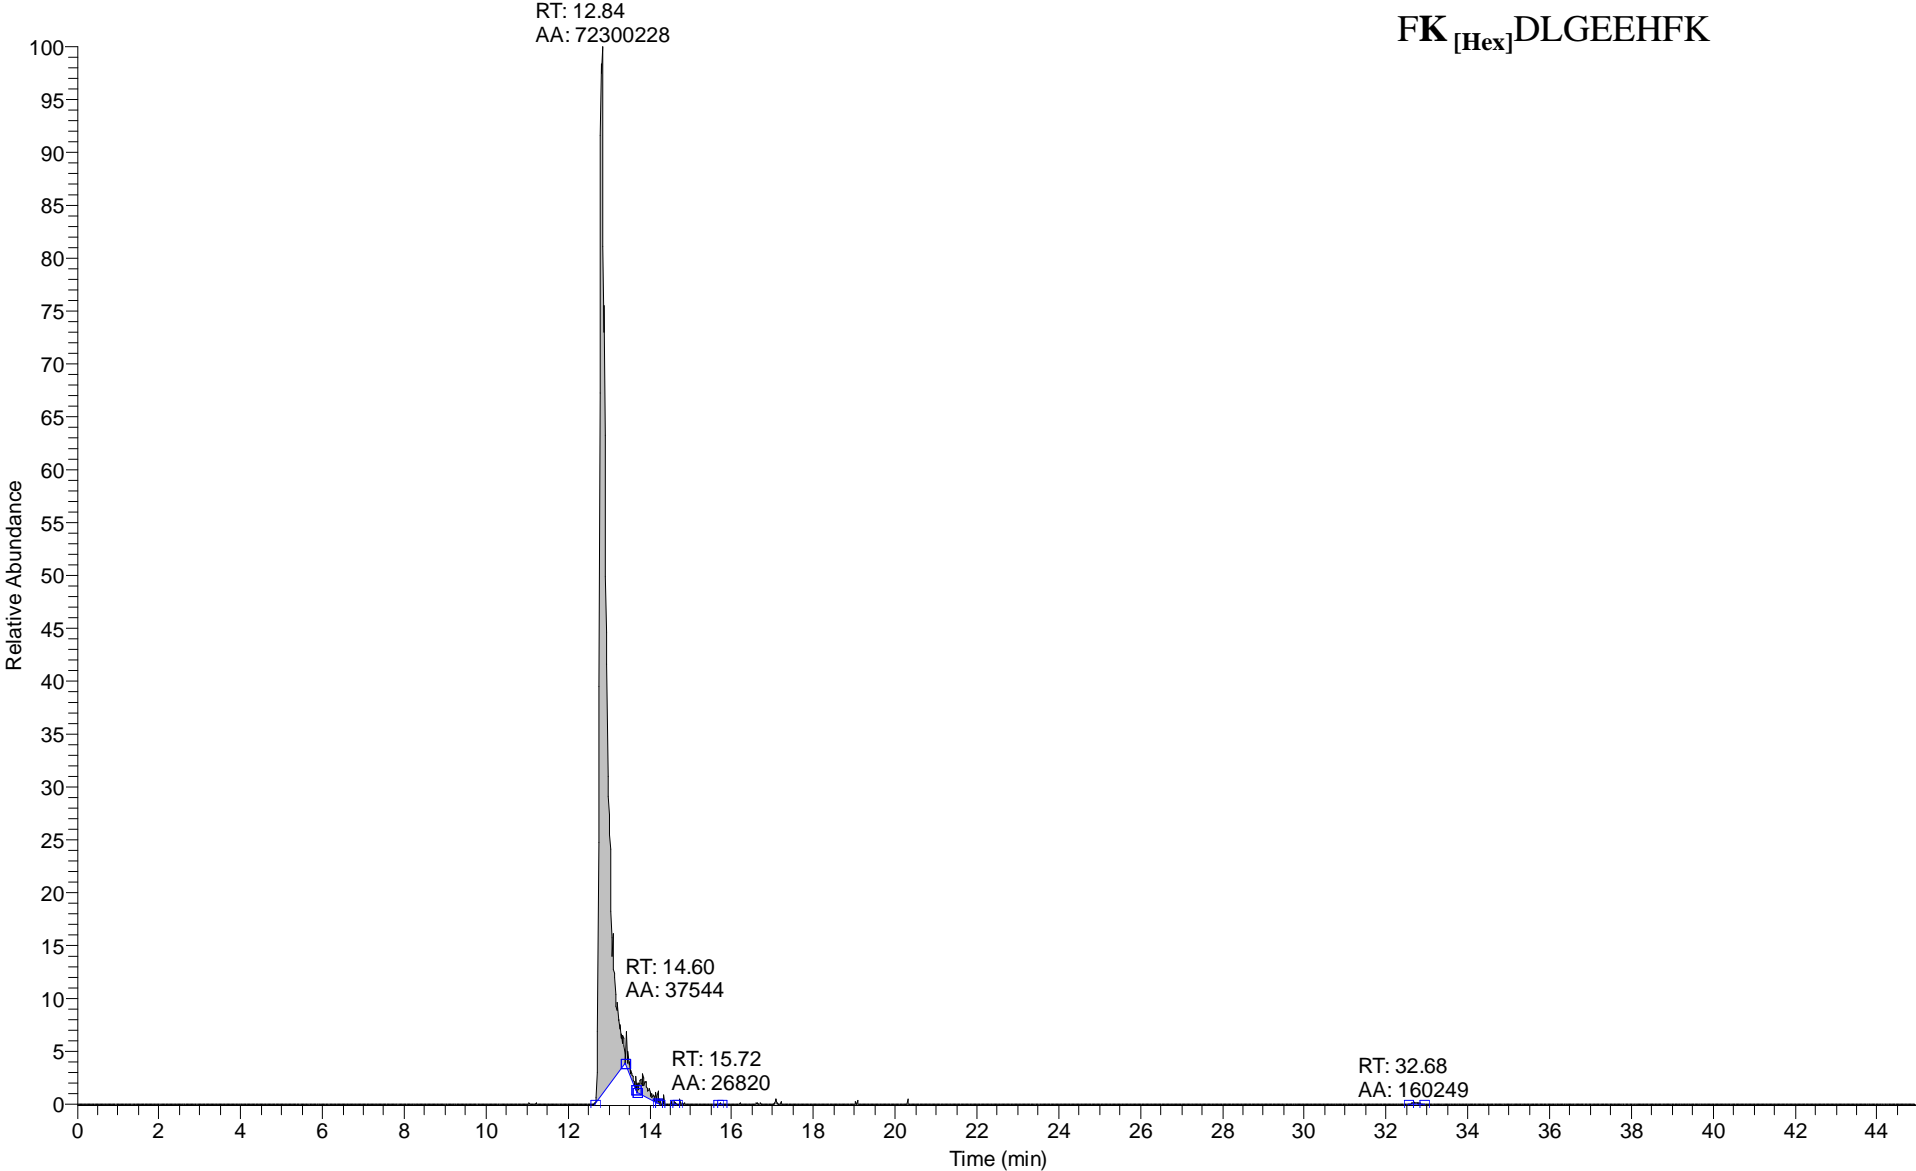

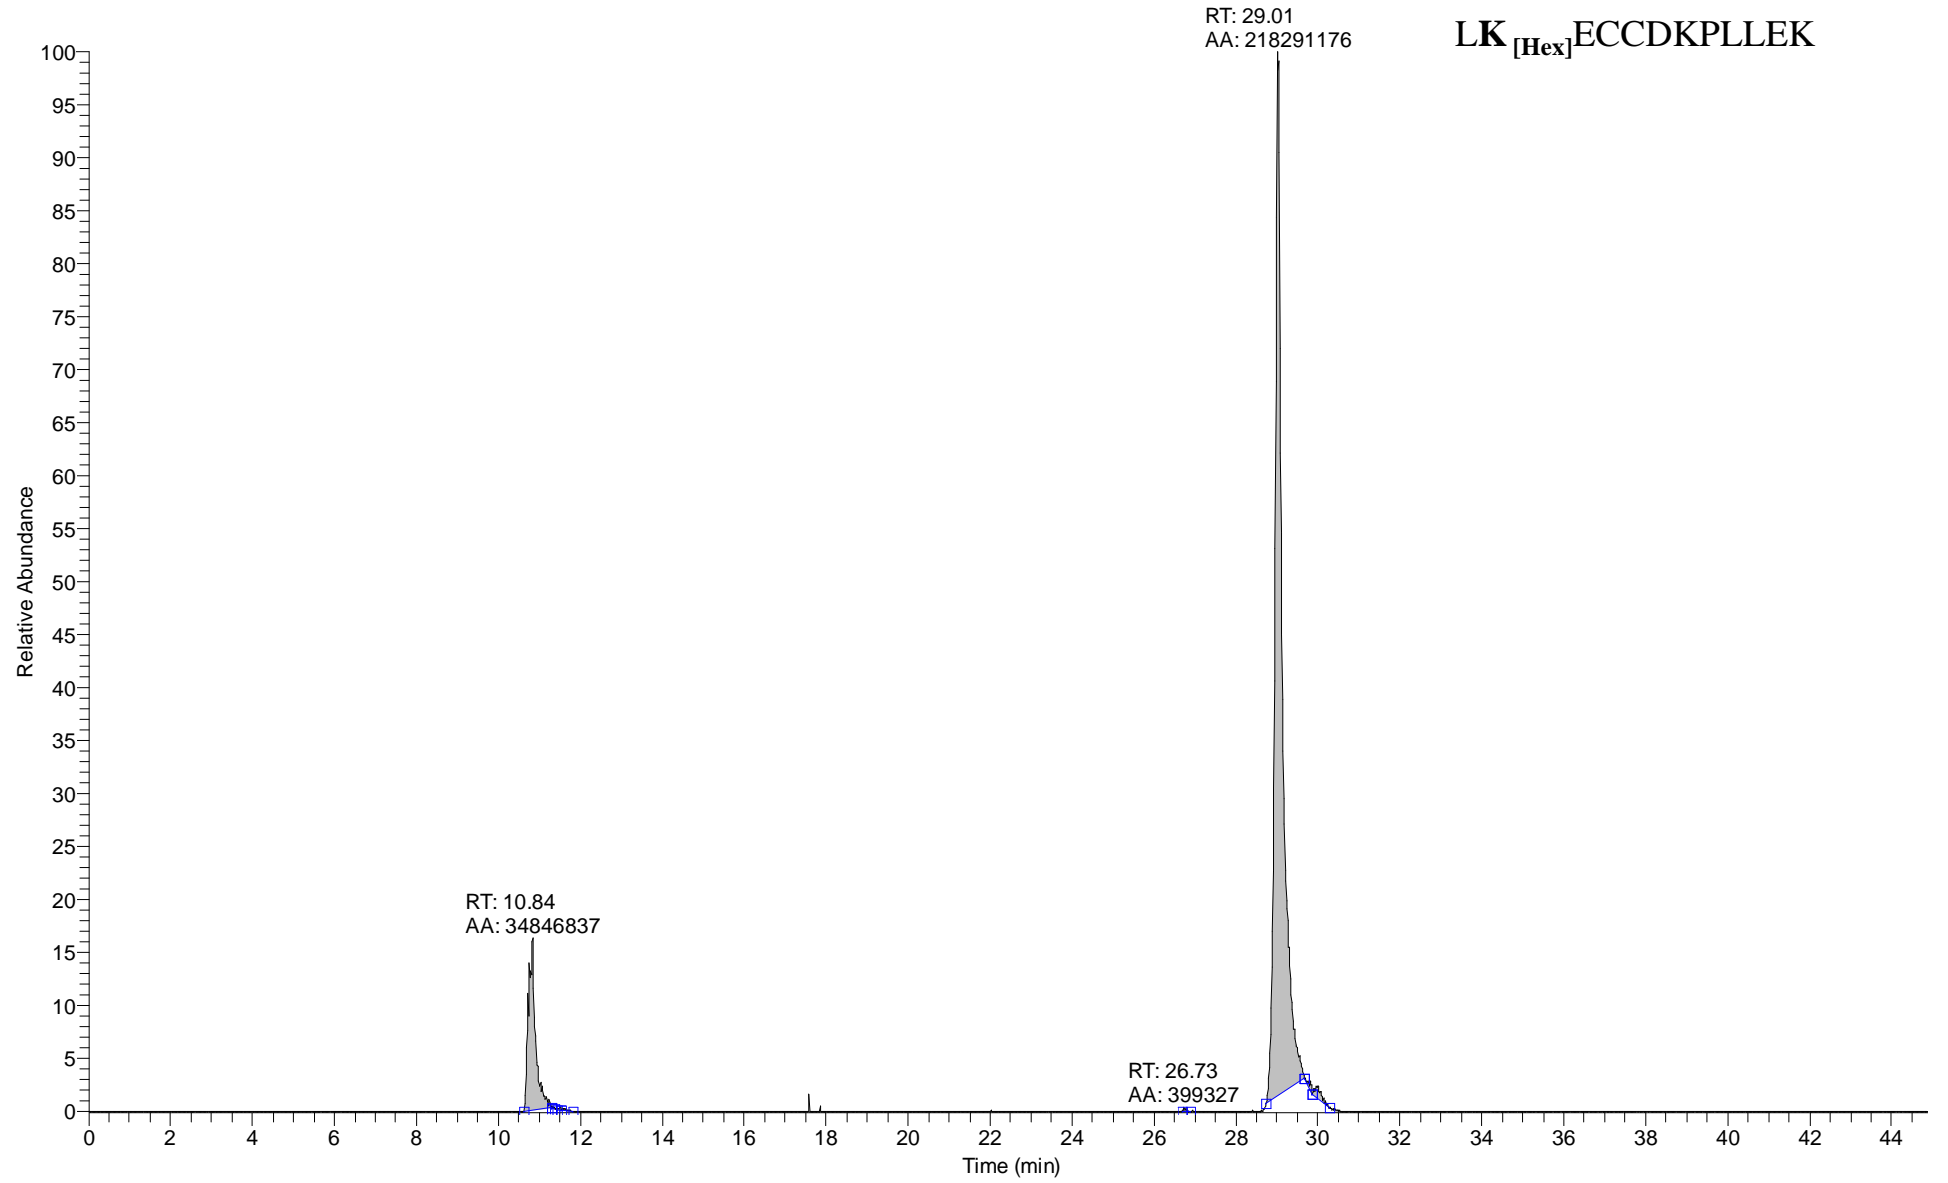

LK<sub>[Hex]</sub>ECCKPLLEK

LK<sub>[Hex]</sub>HLVDEPQNLIK

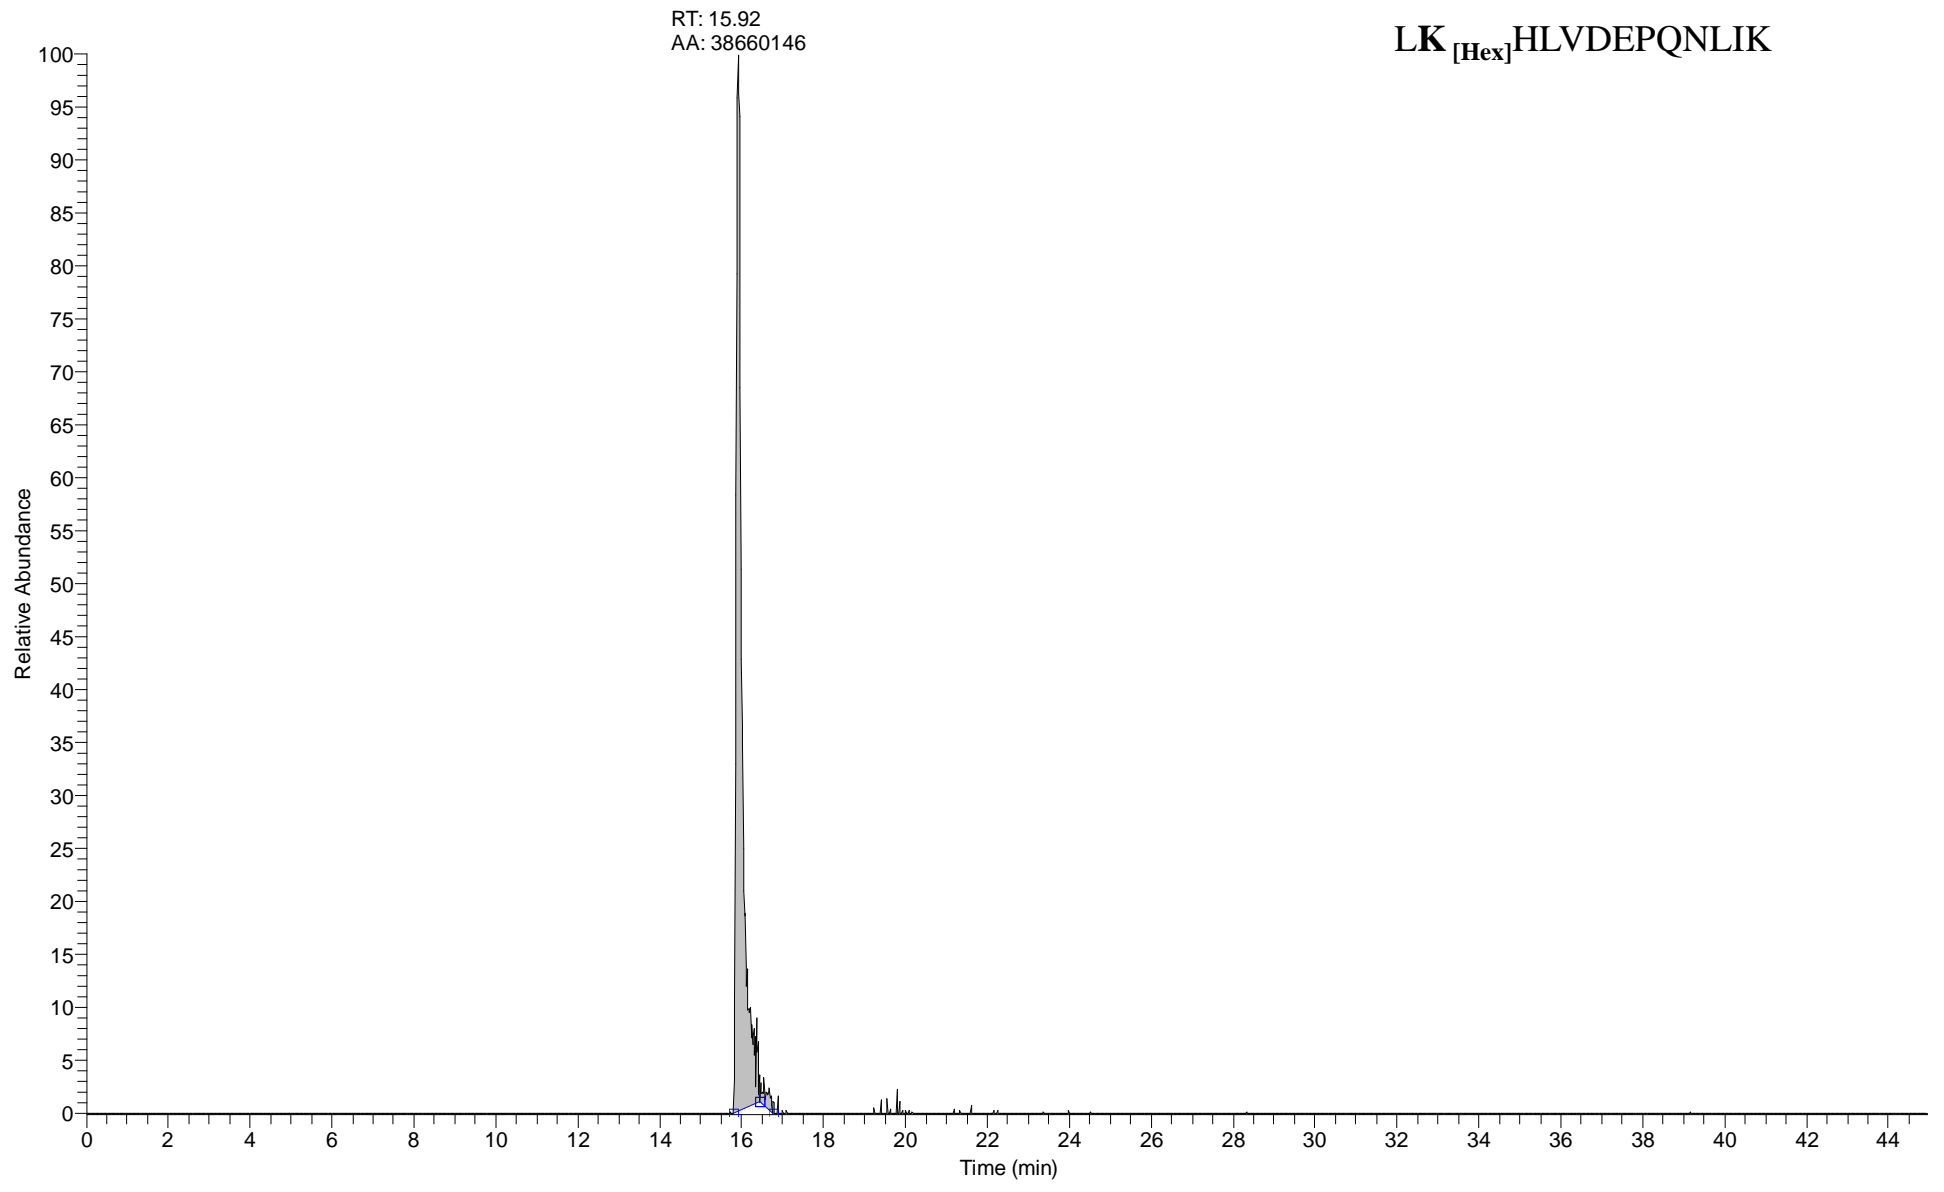

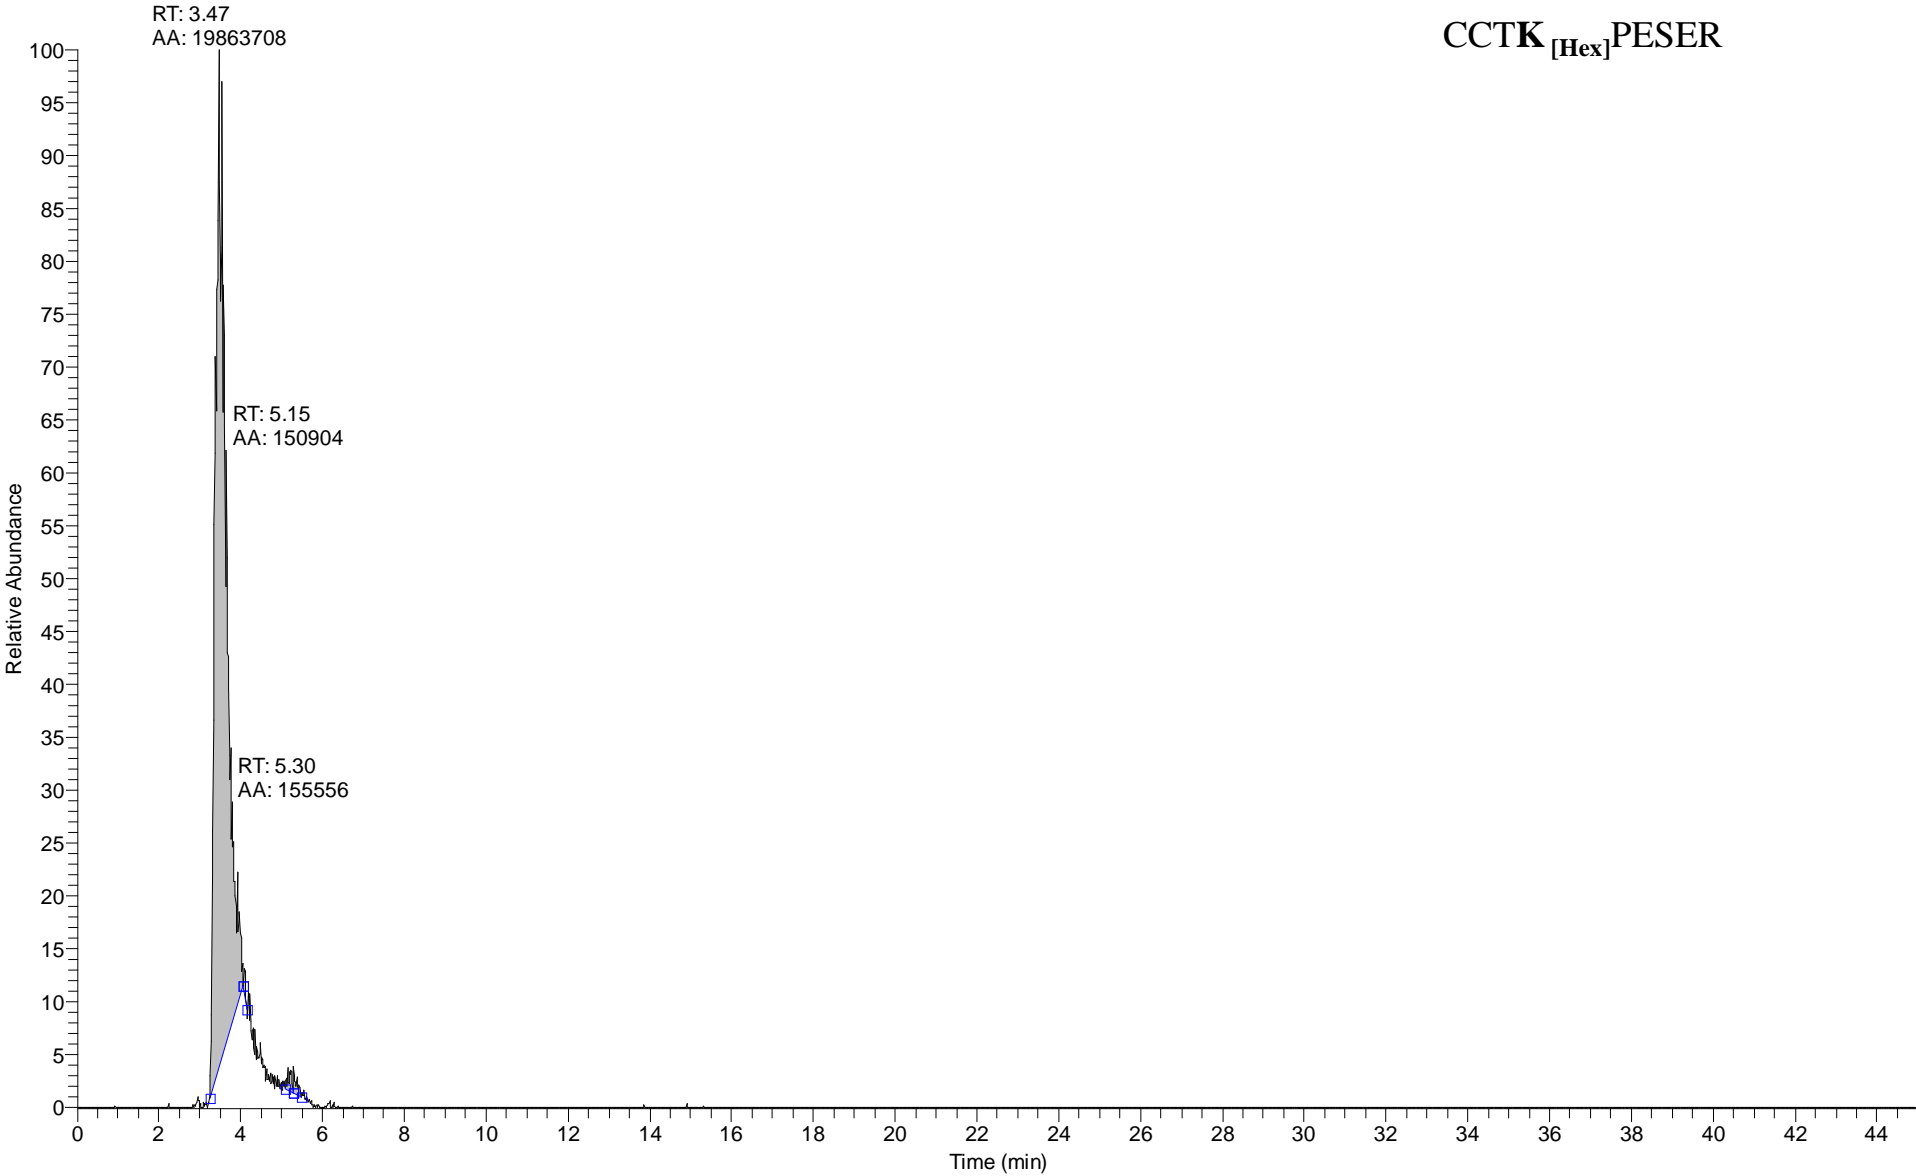



ETYGDMADCCEK<sub>[Hex]</sub>QEPER

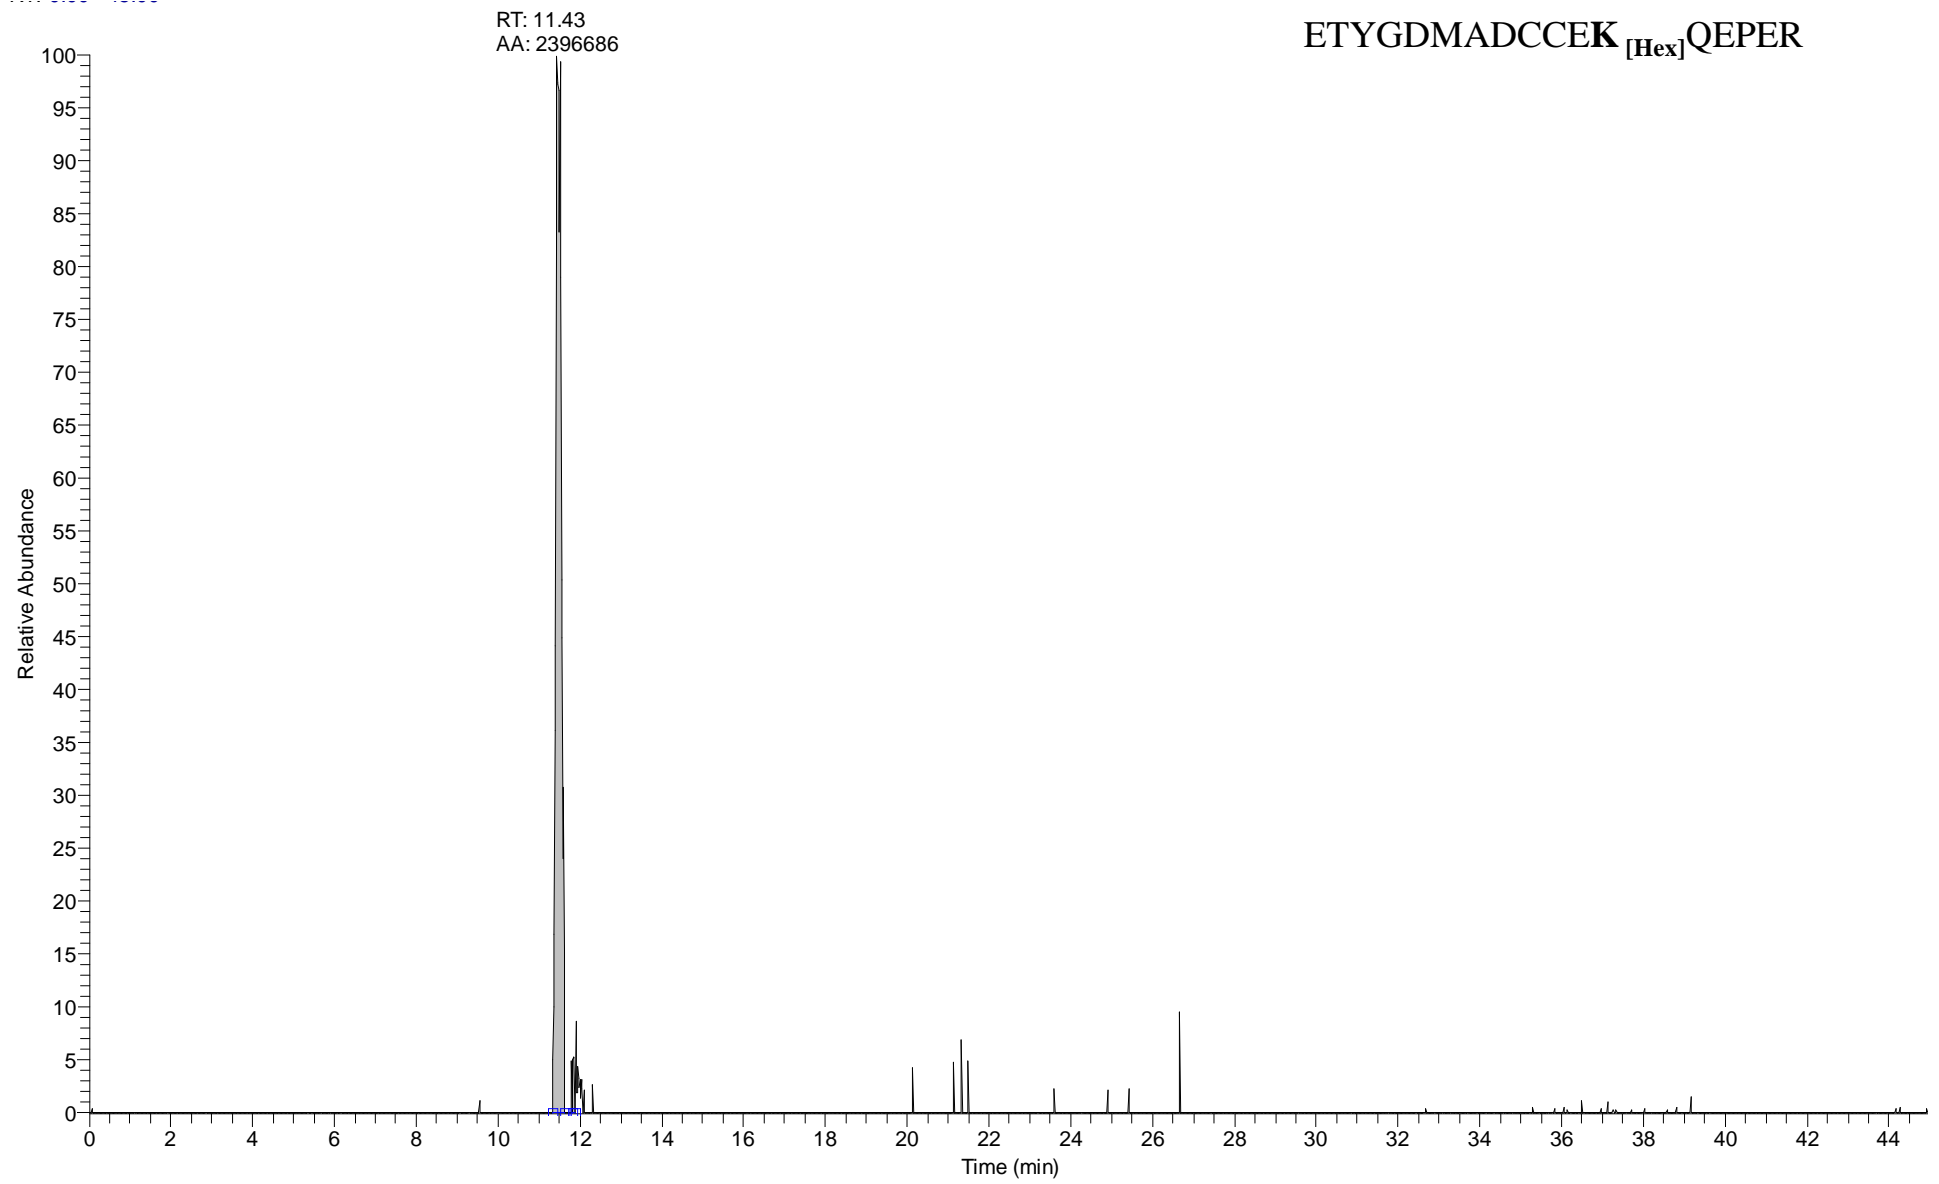

LKPDPNTLCDEFK<sub>[Hex]</sub>ADEKK

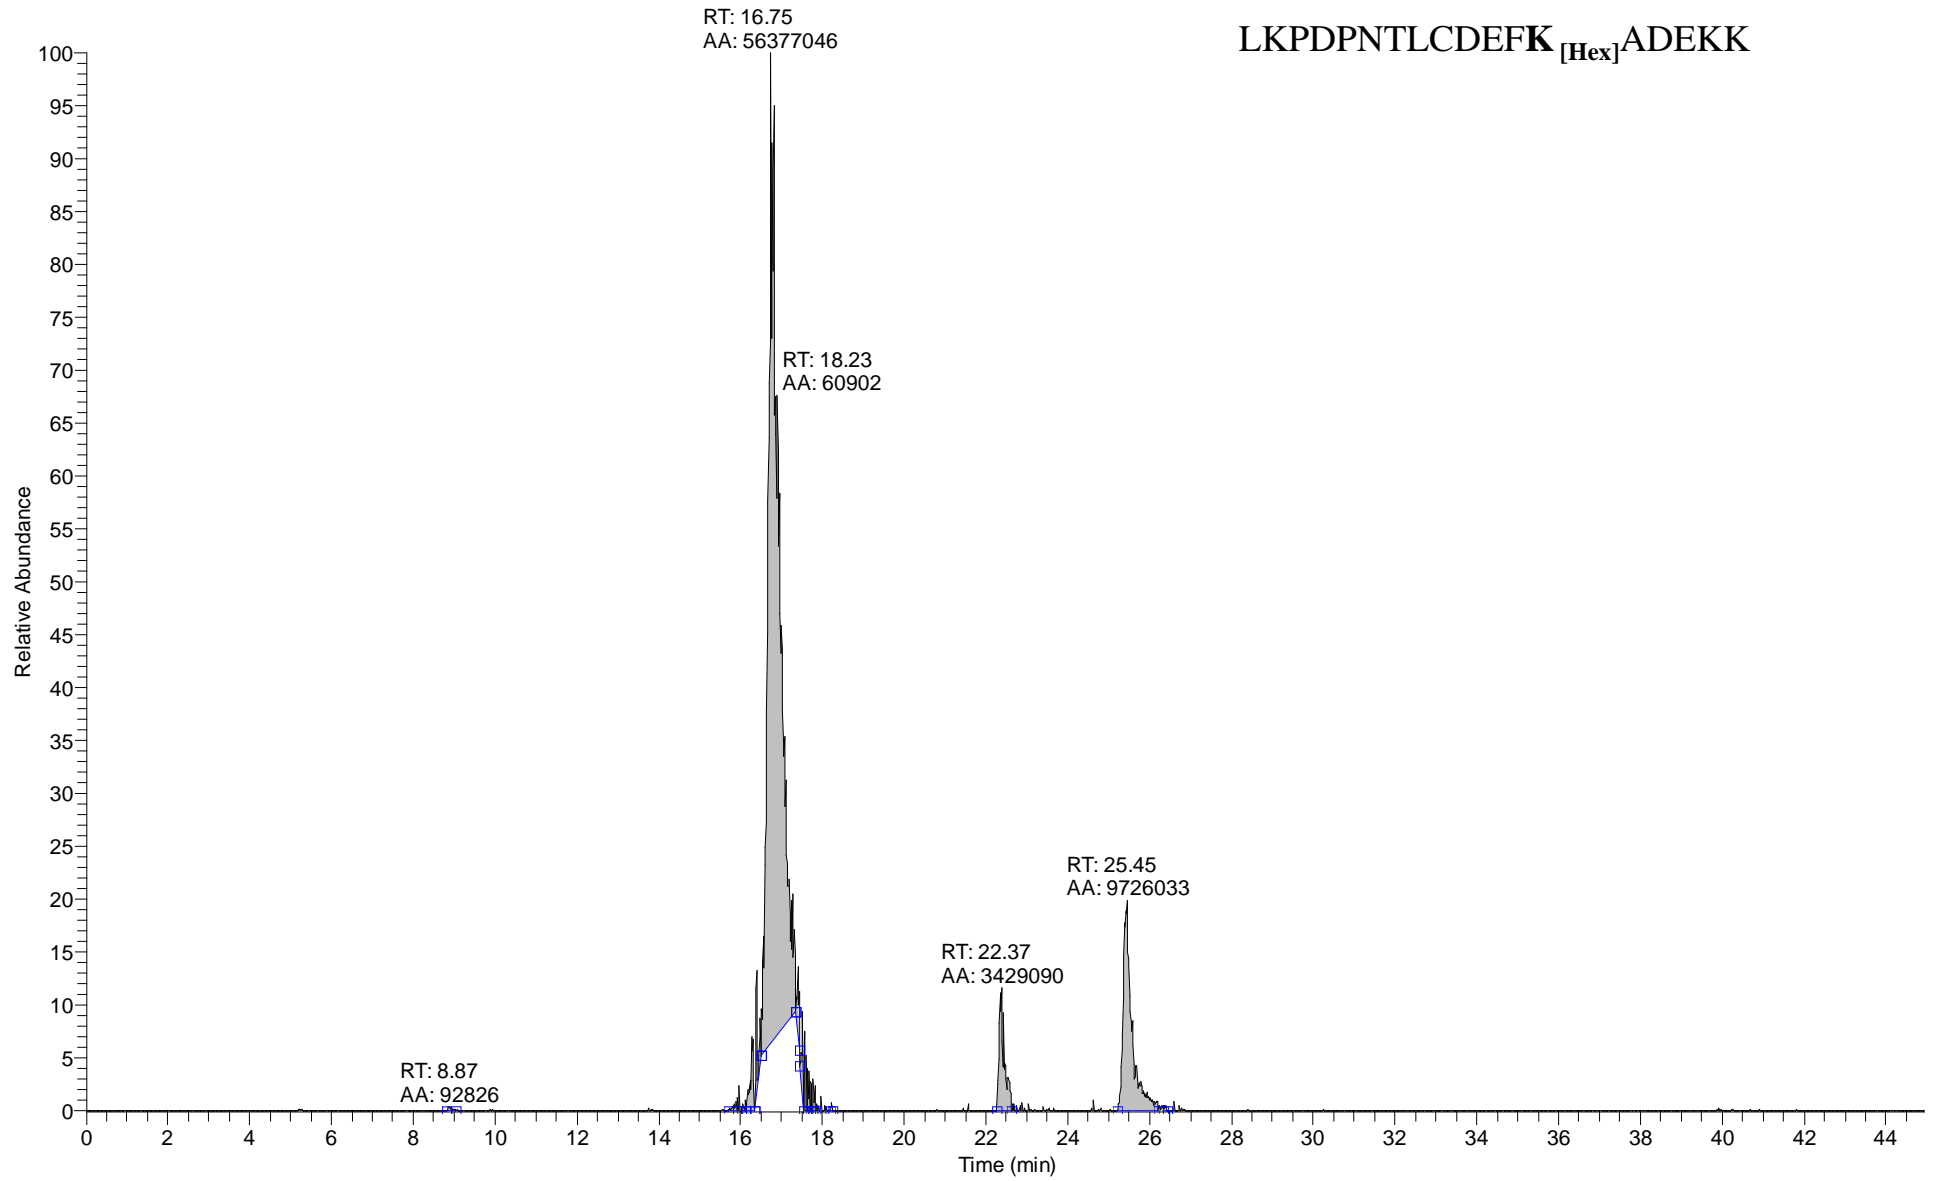

NECFLSHK<sub>[Hex]</sub>DDSPDLPK

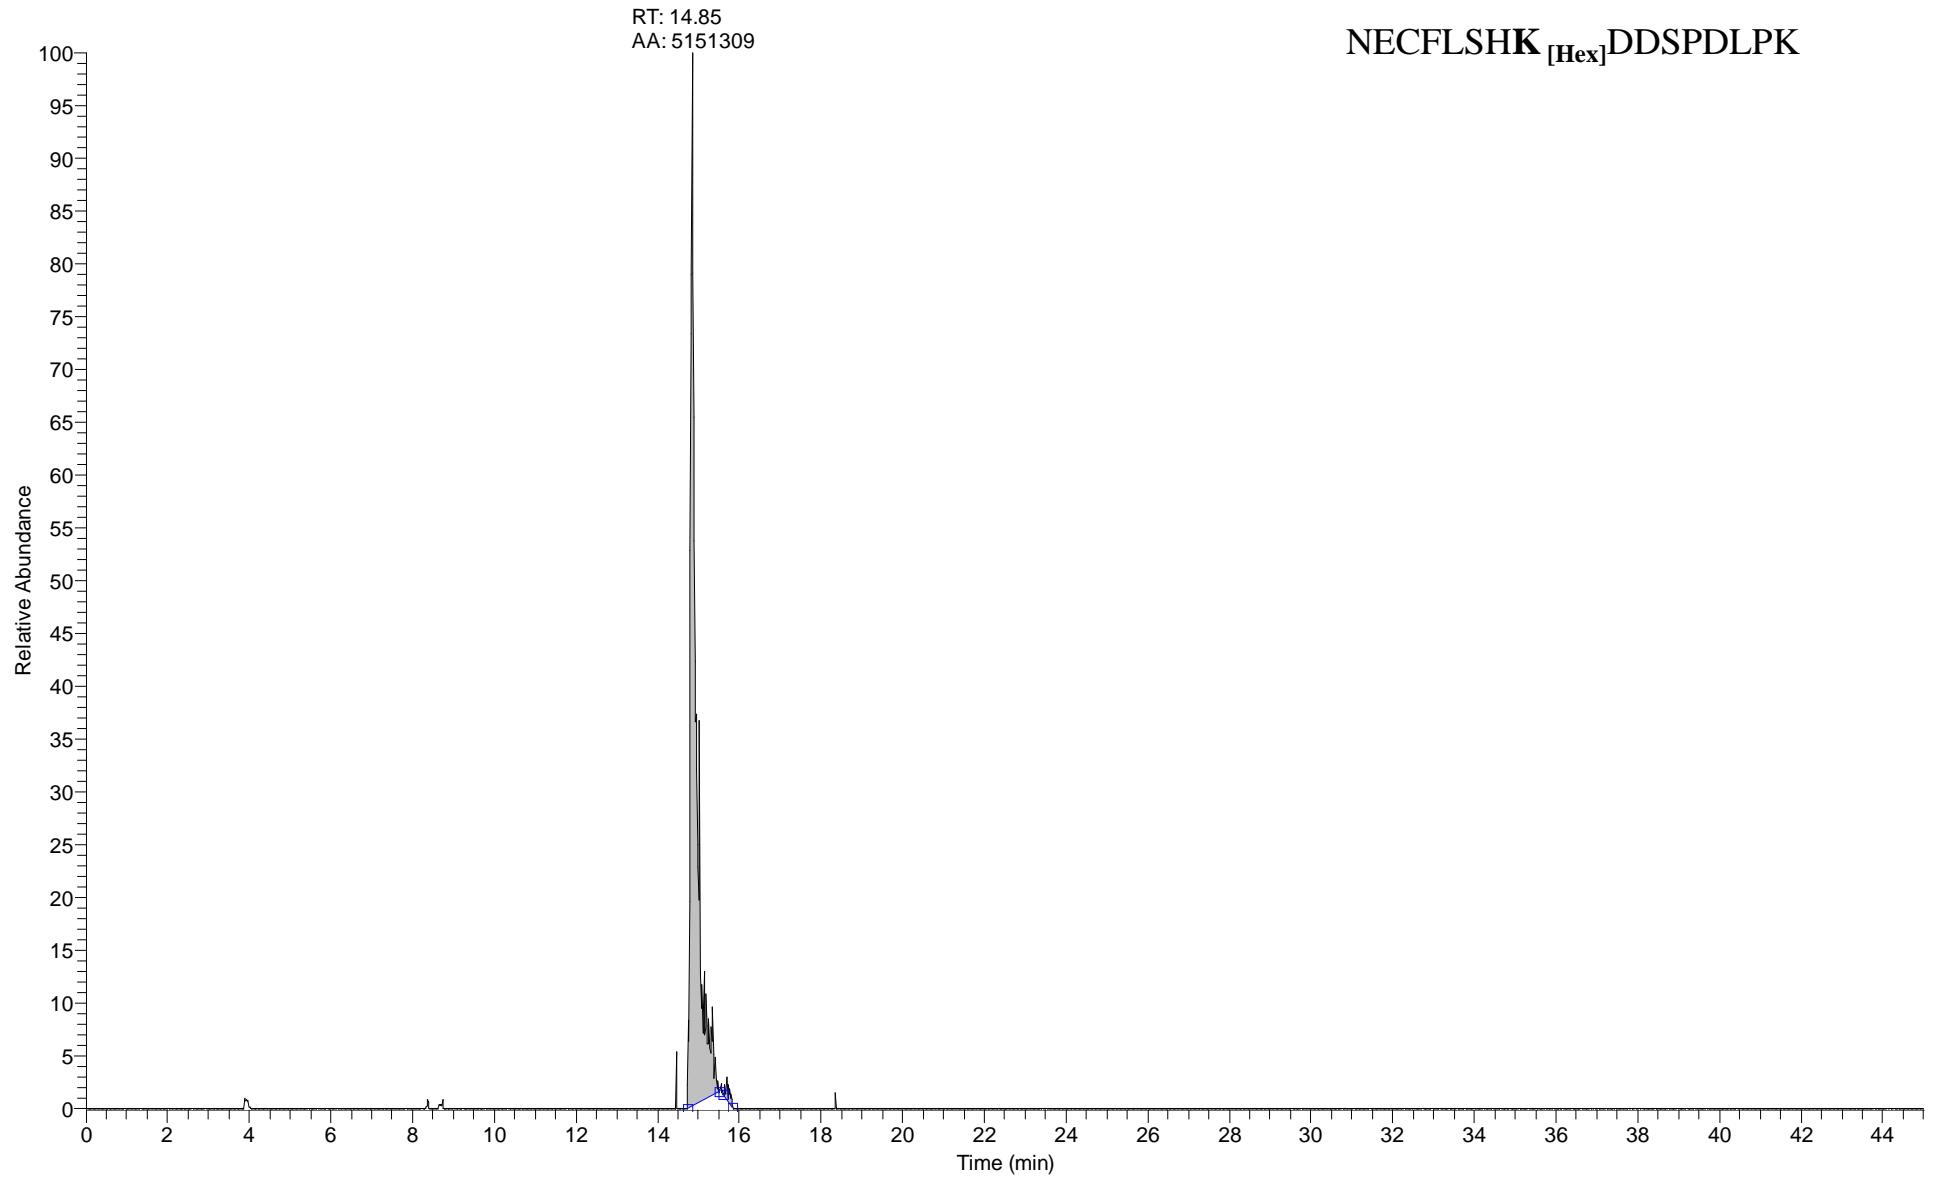

**Glycated modified peptides of BSA treated with Isoprenaline –  
XIC's**

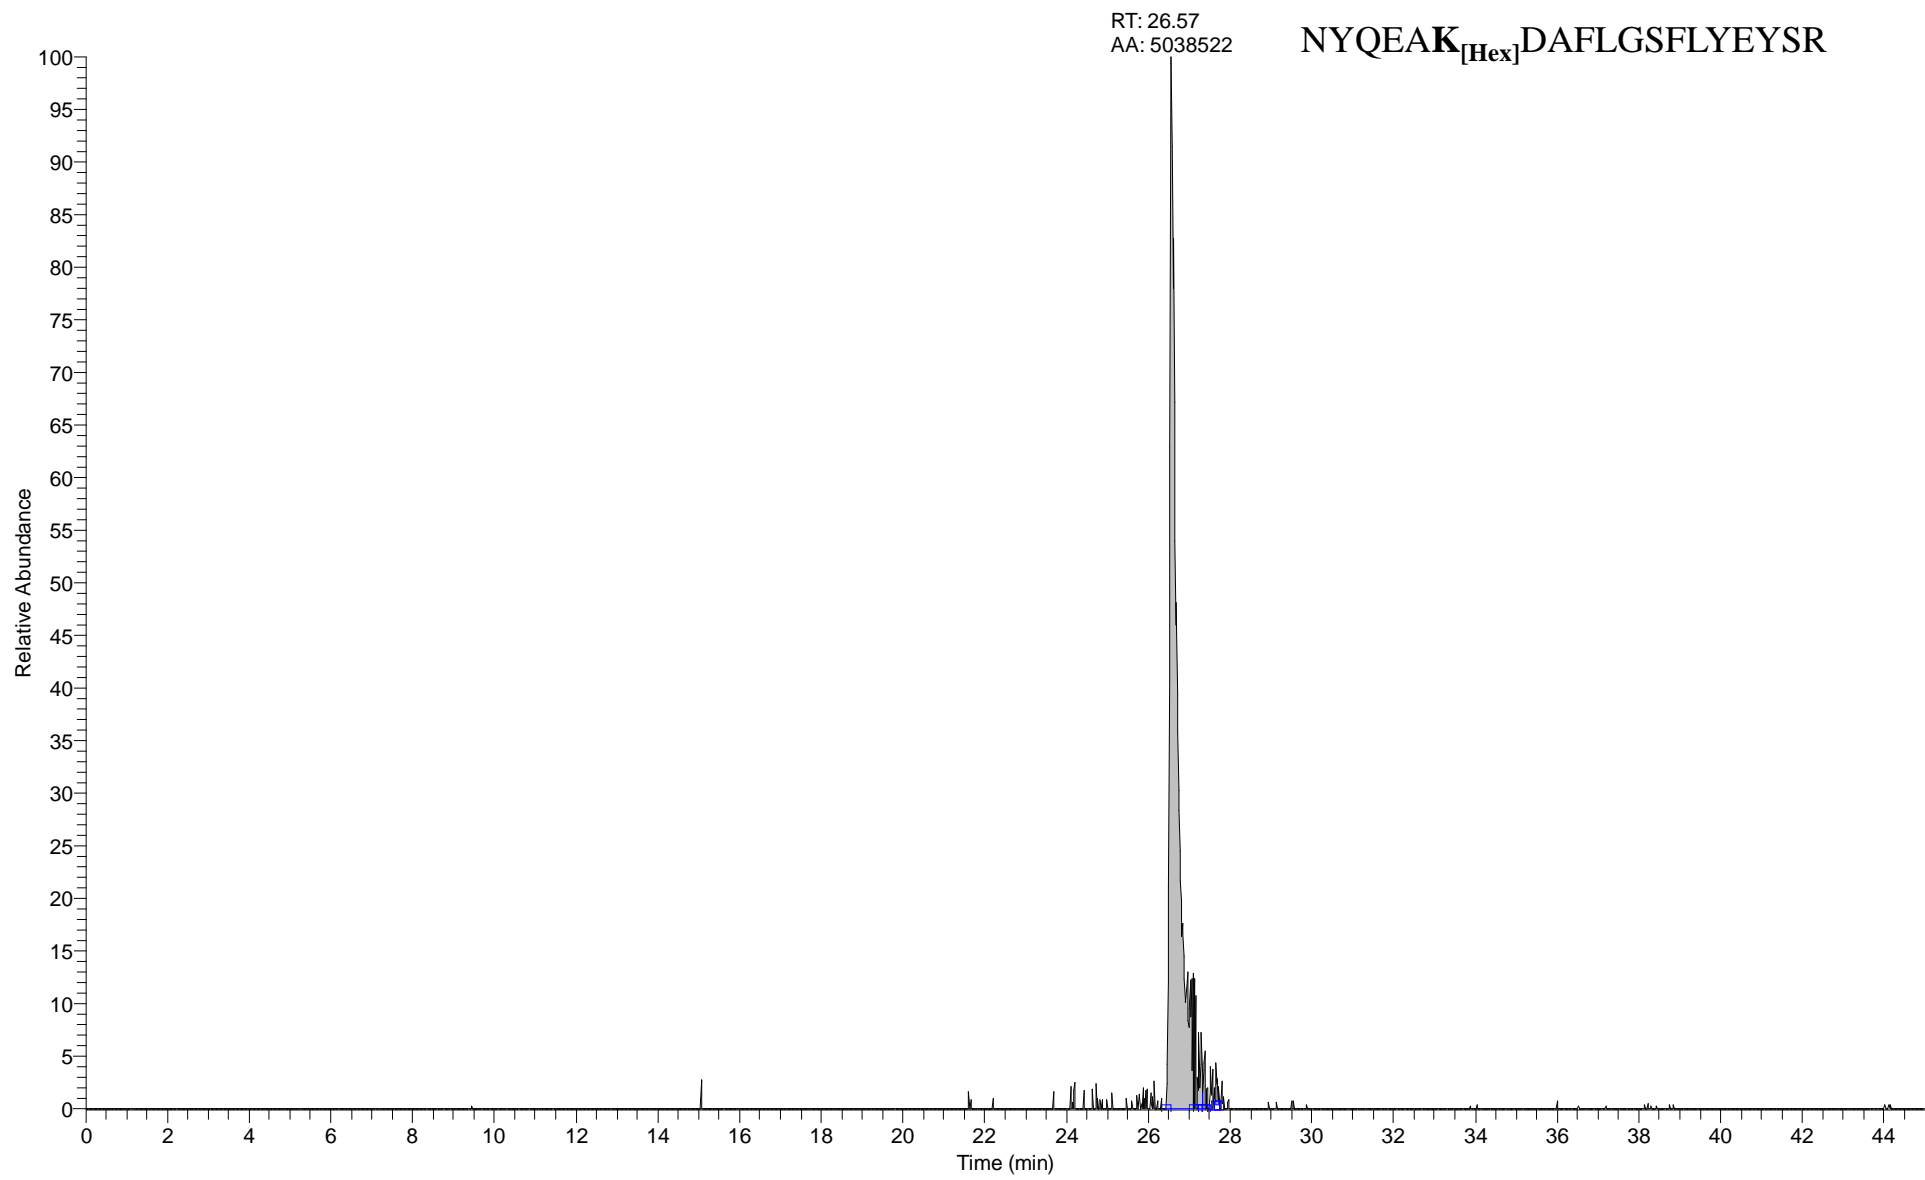

AEFVEVTK<sub>[Hex]</sub>LVTDLTK

RT: 27.42  
AA: 13460102

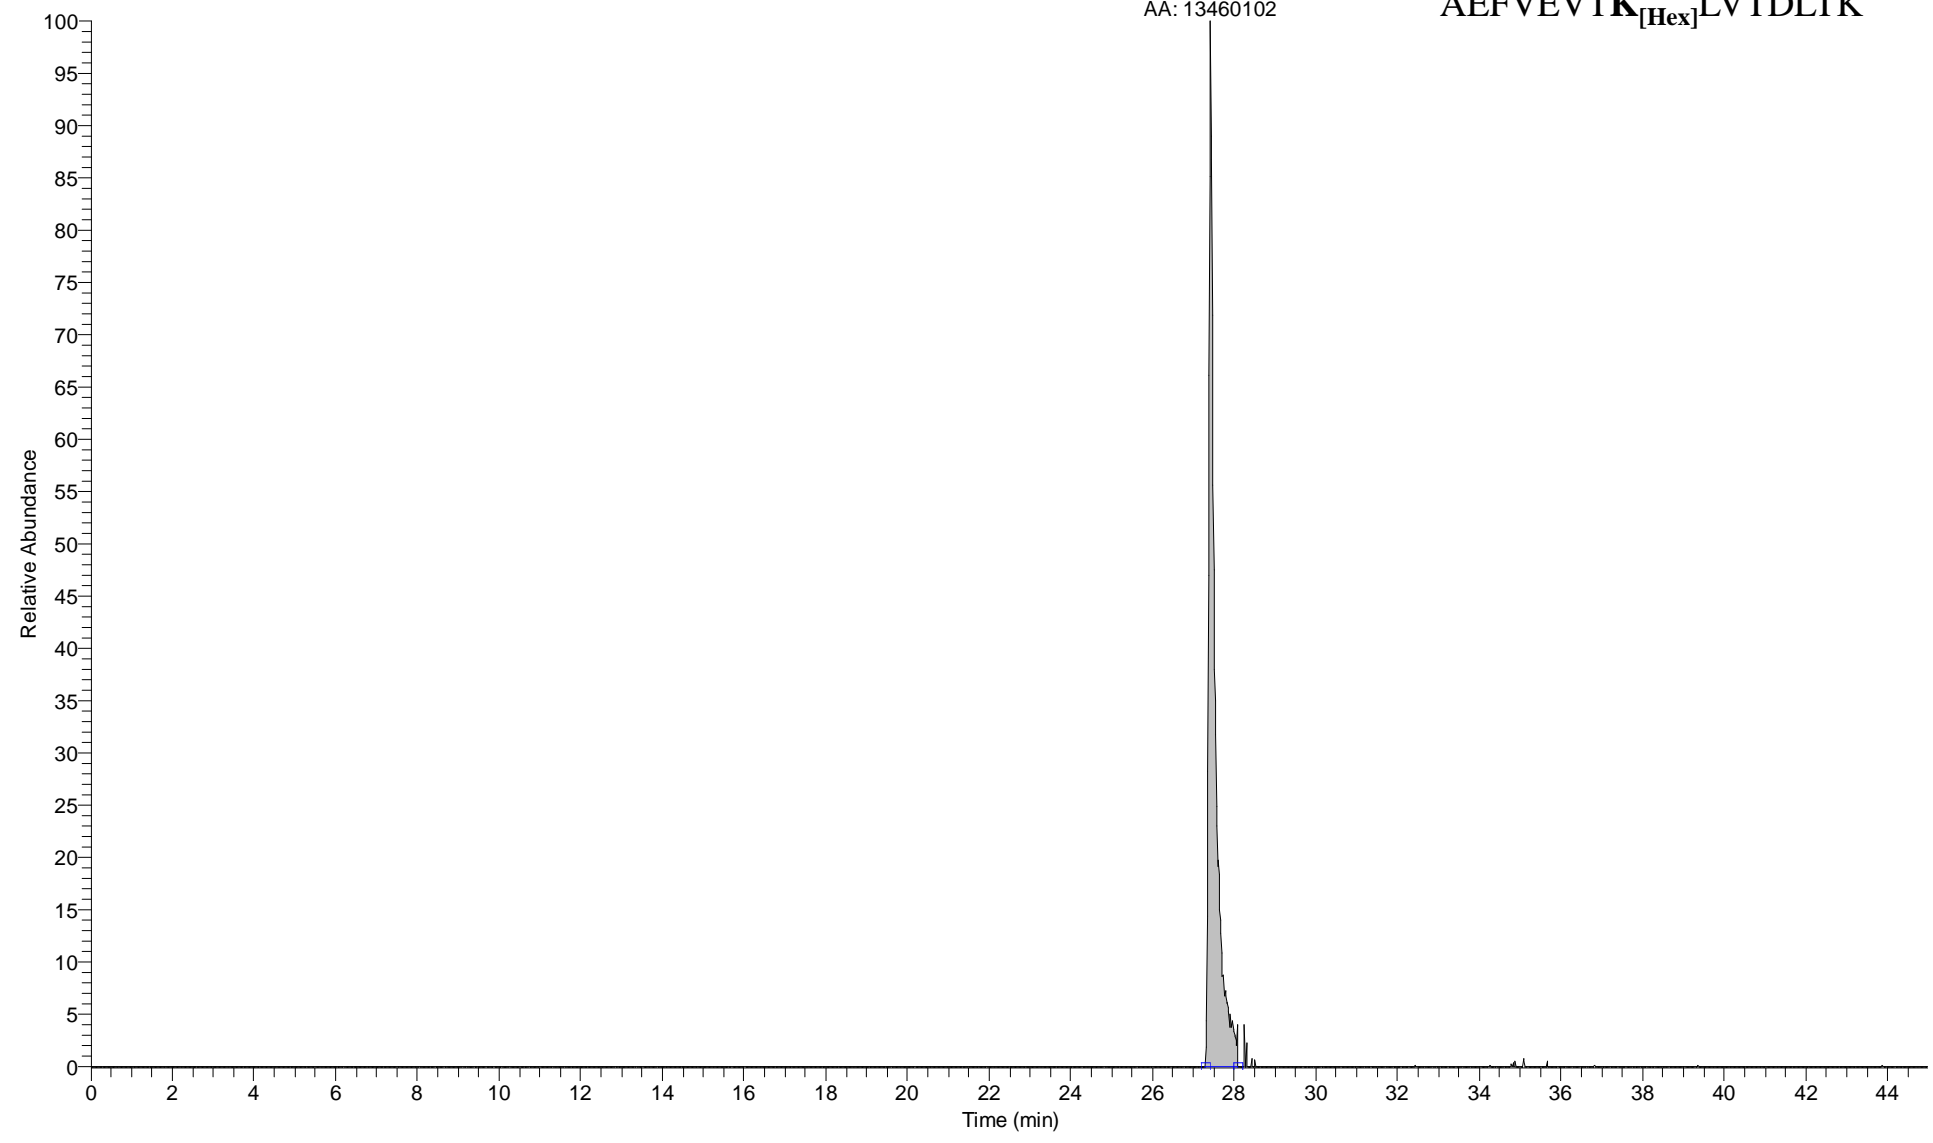

CCAADDK<sub>[Hex]</sub>EACFAVEGPK

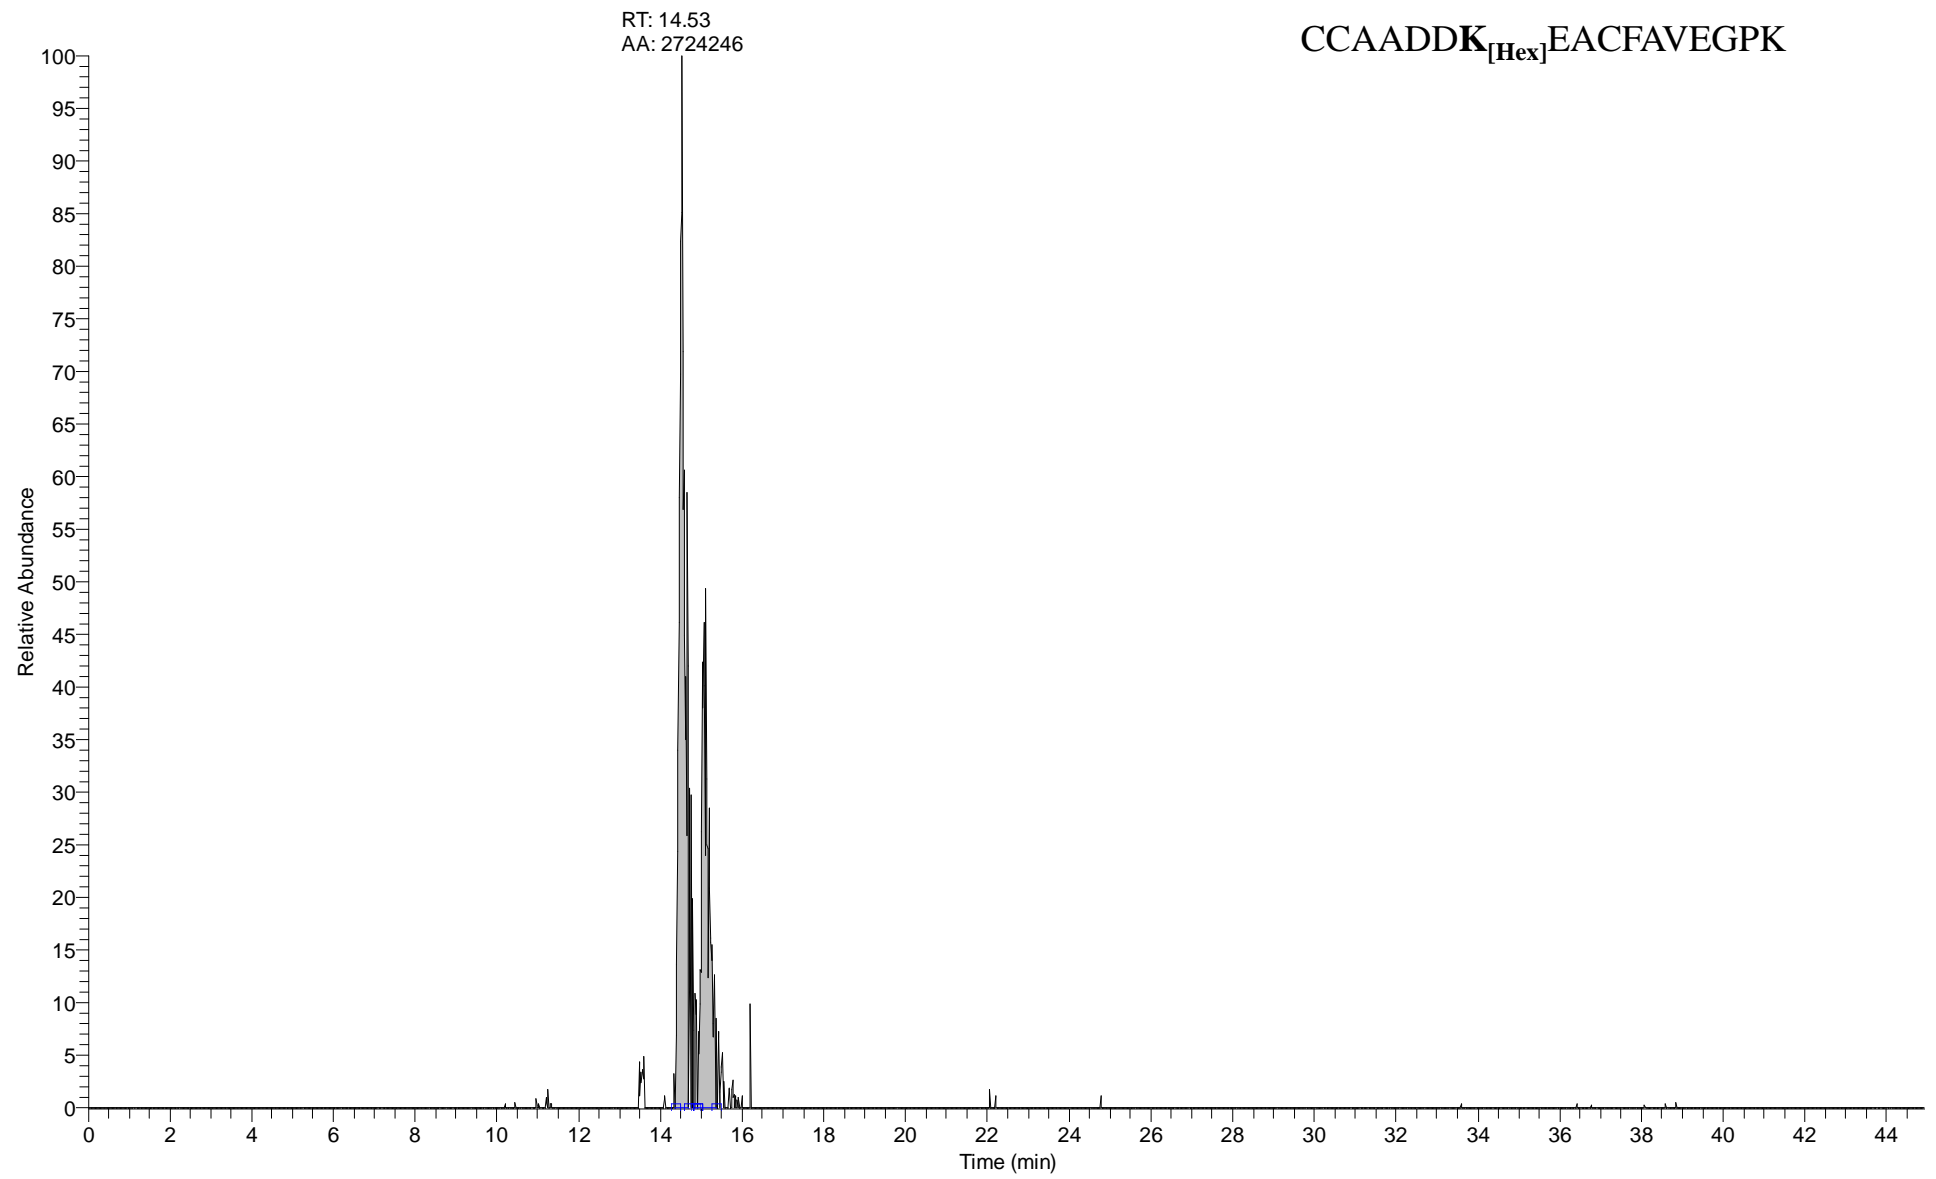

**K<sub>[Hex]</sub>QTALVELLK**

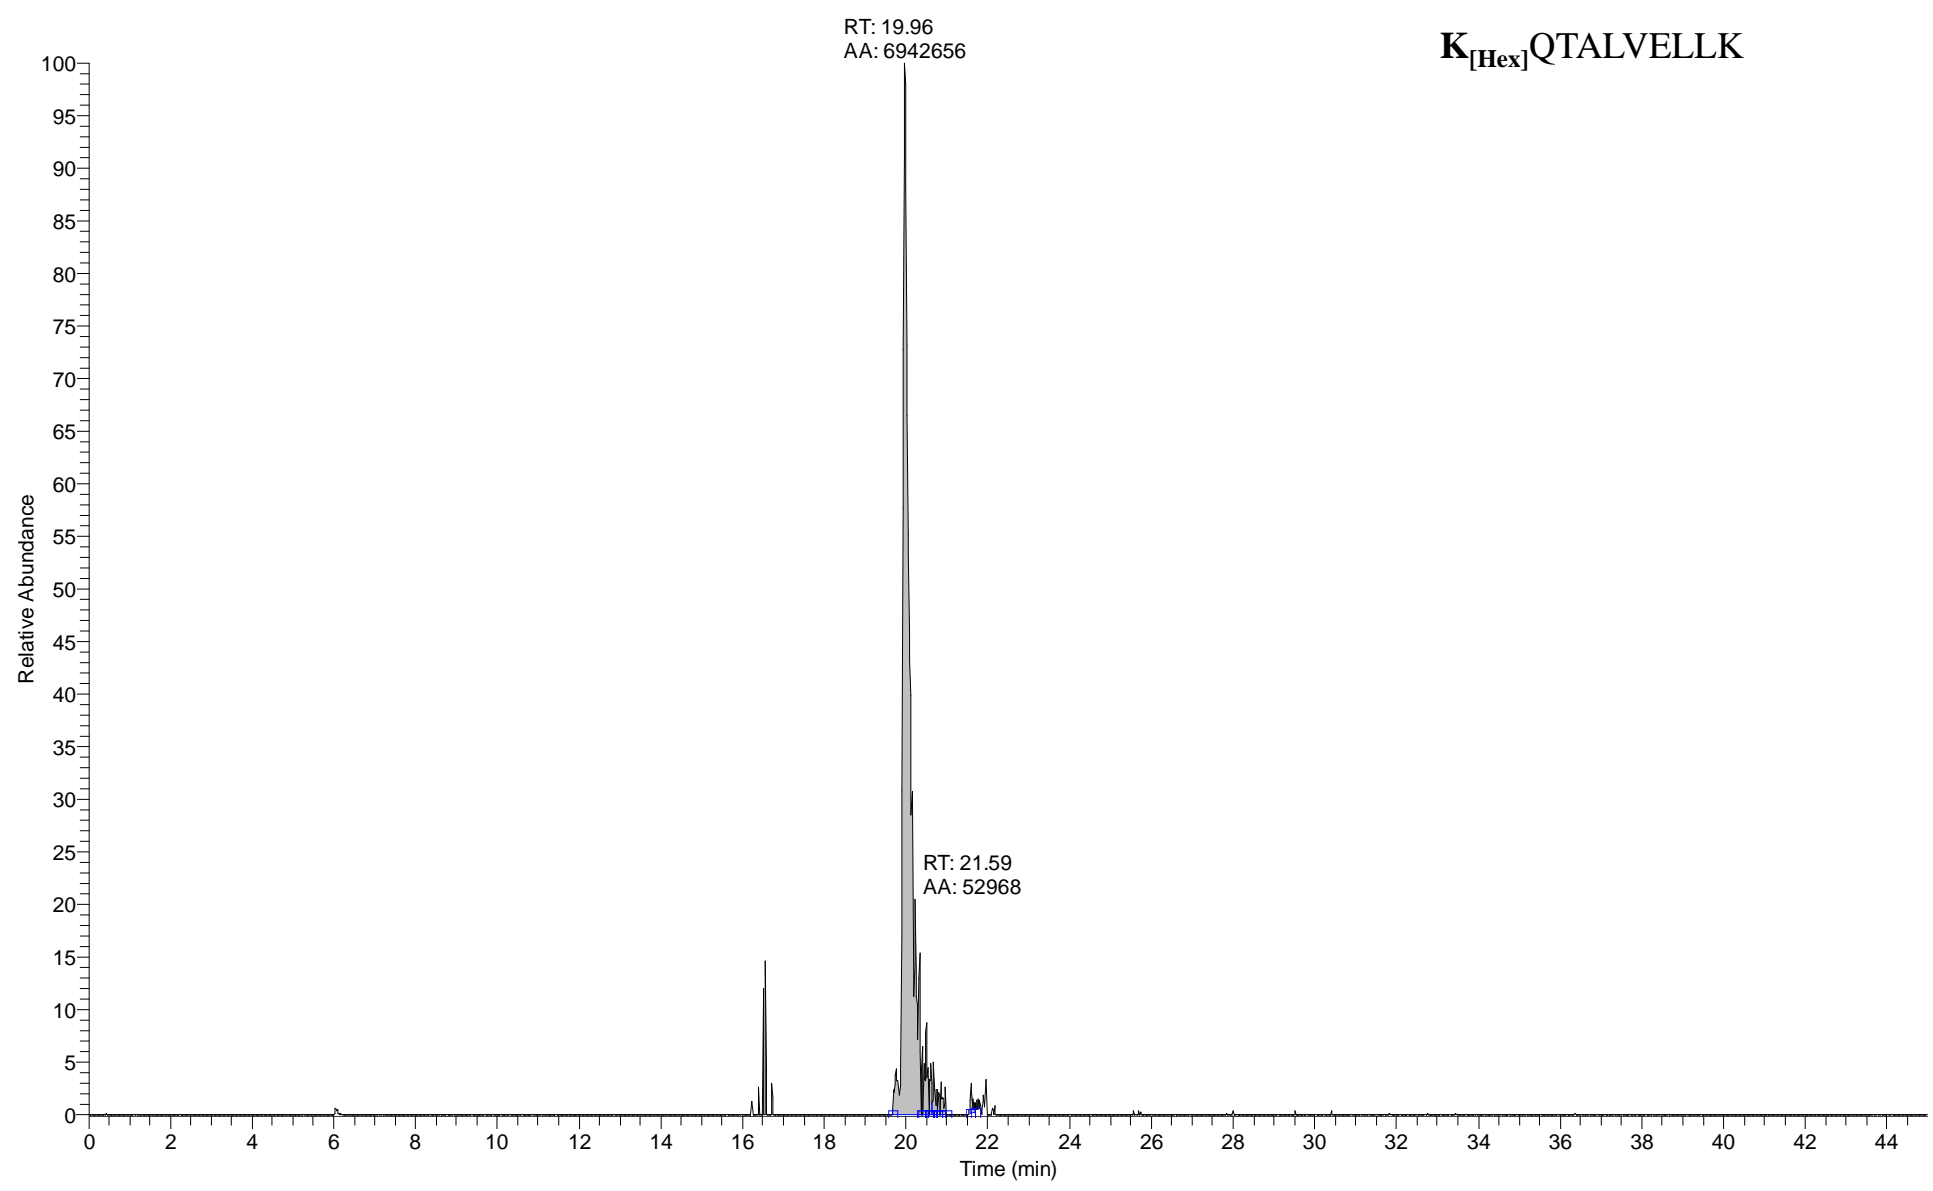



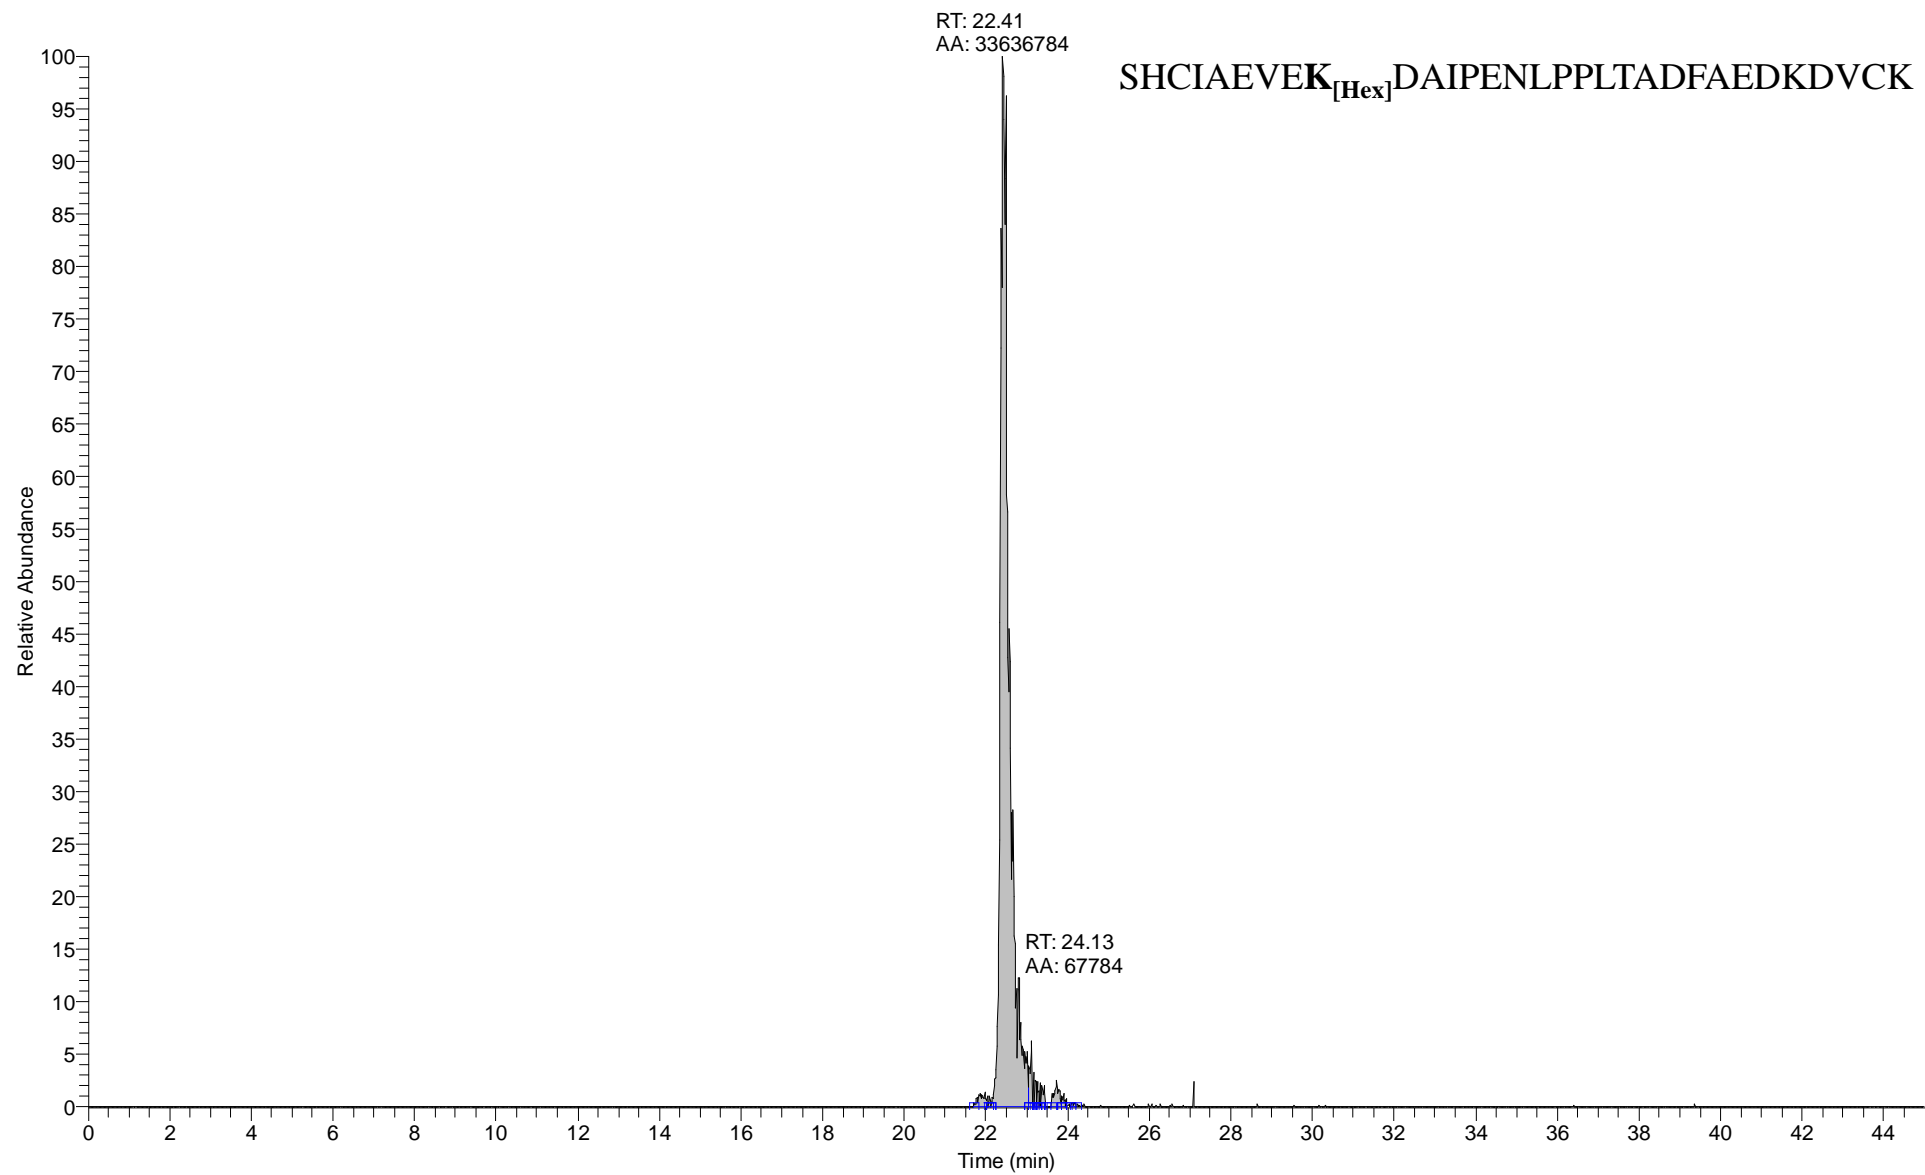

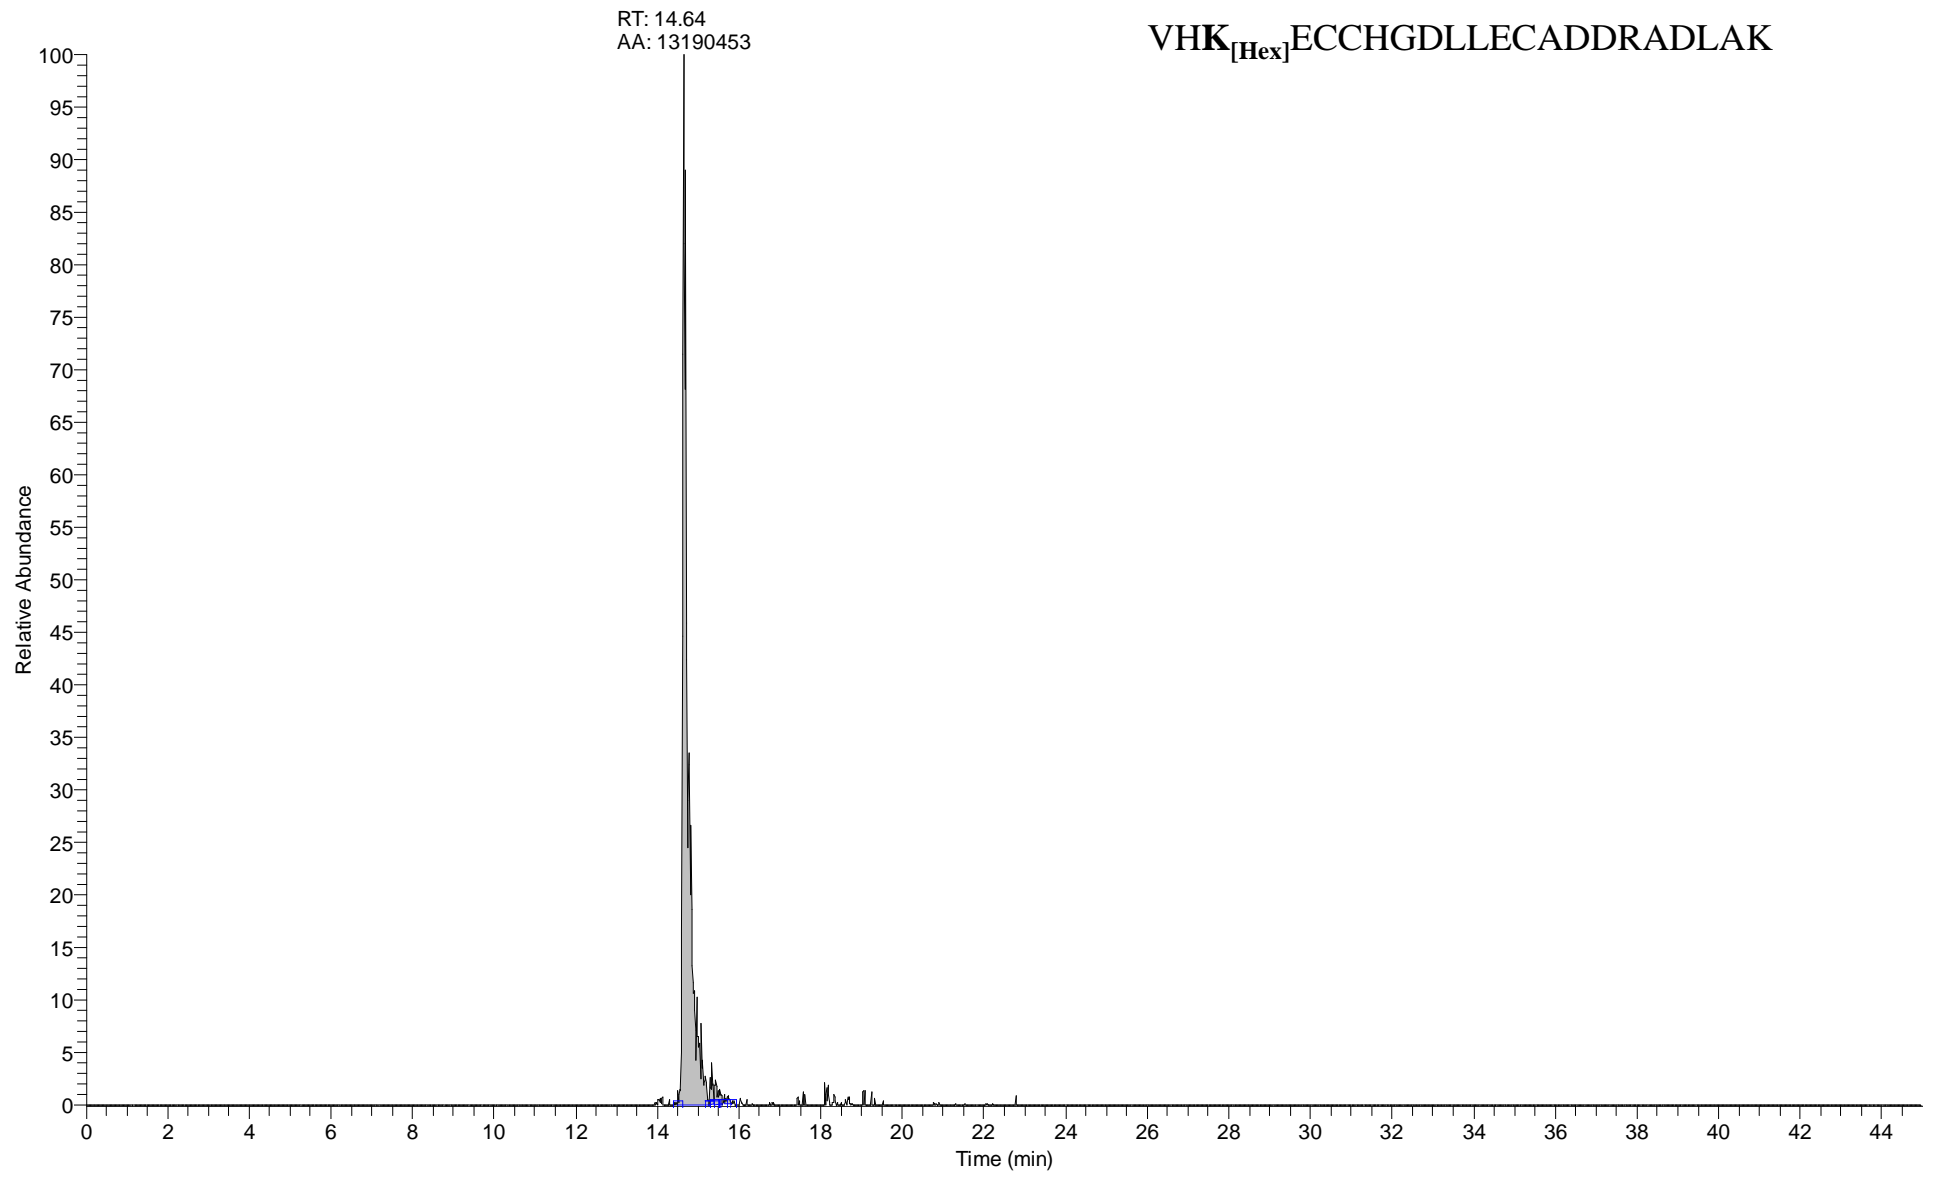

LAK<sub>[Hex]</sub>EYEATLEECCA

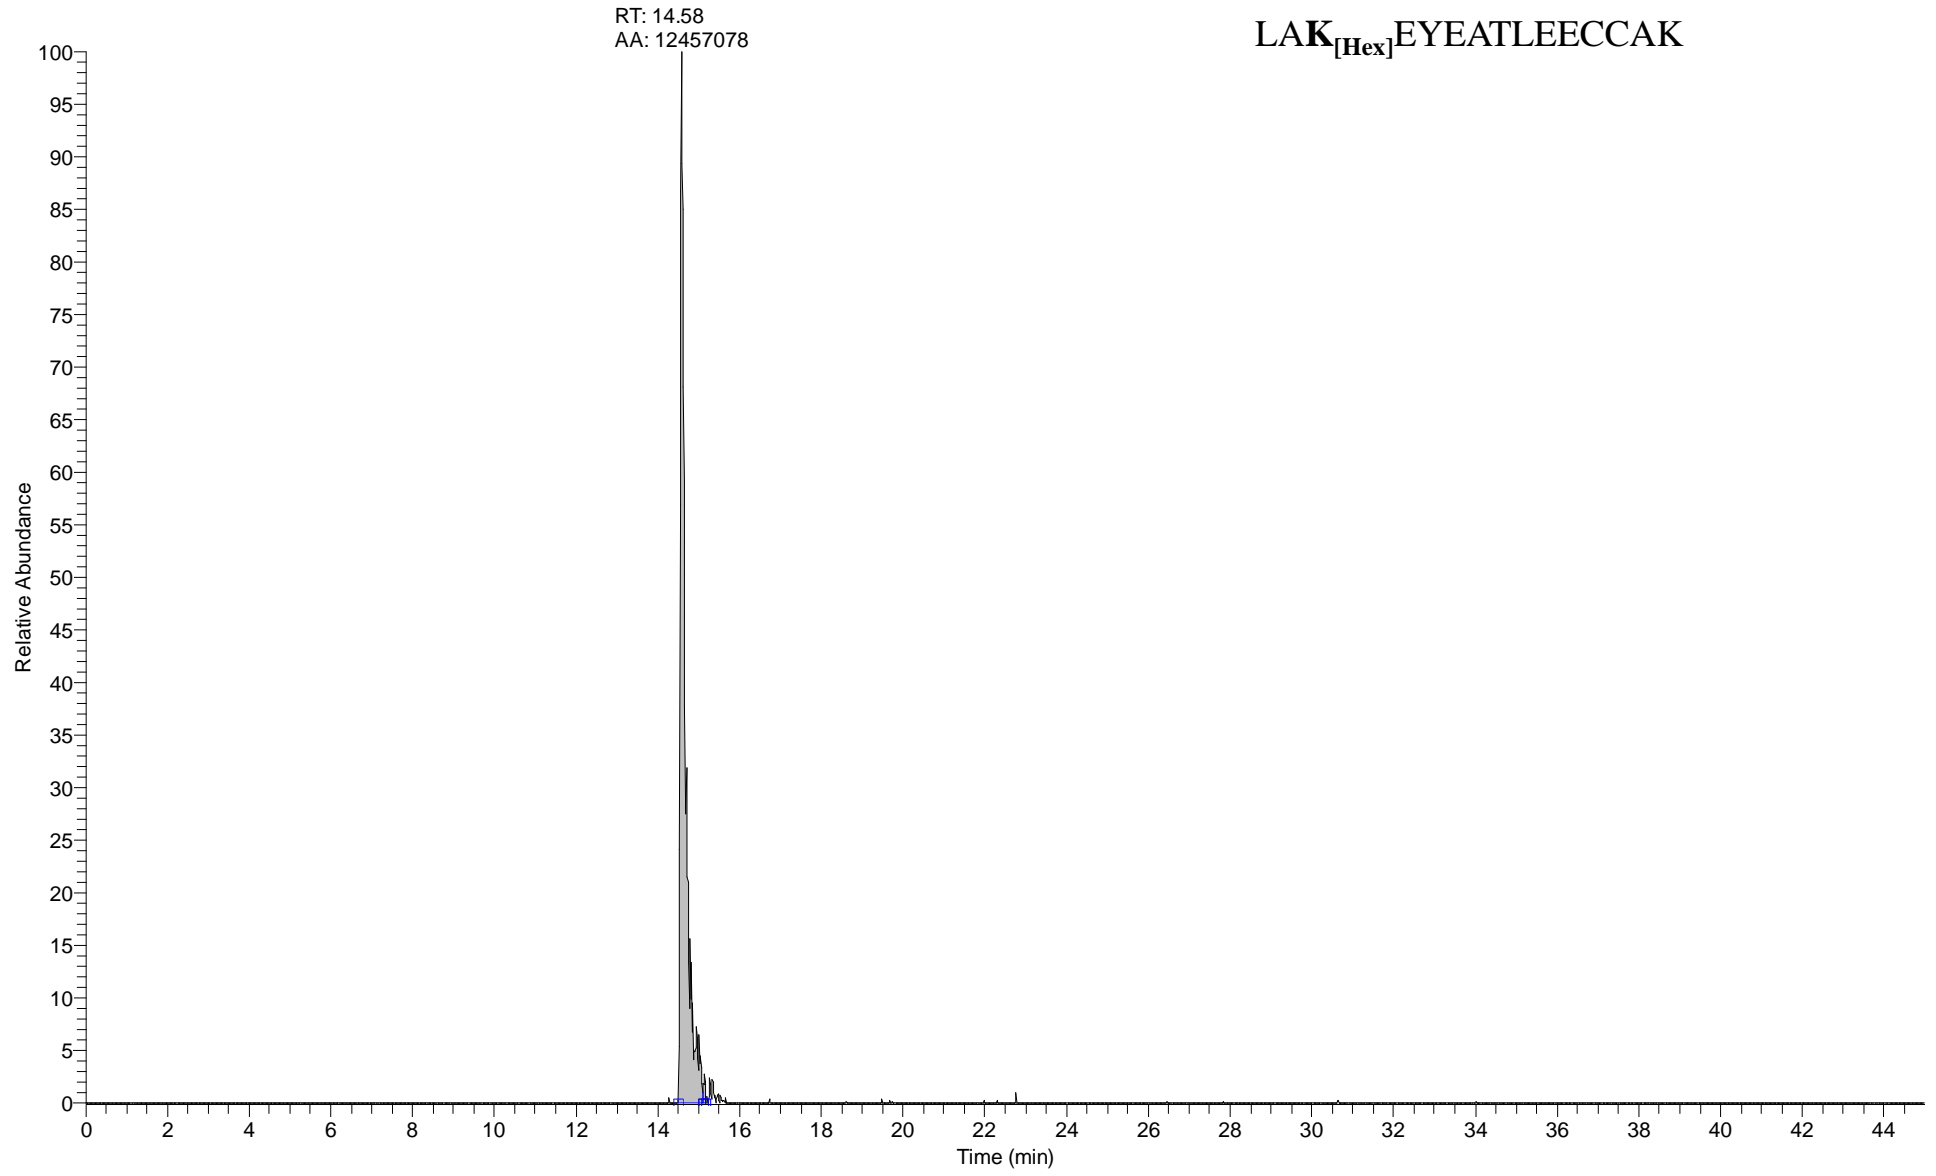

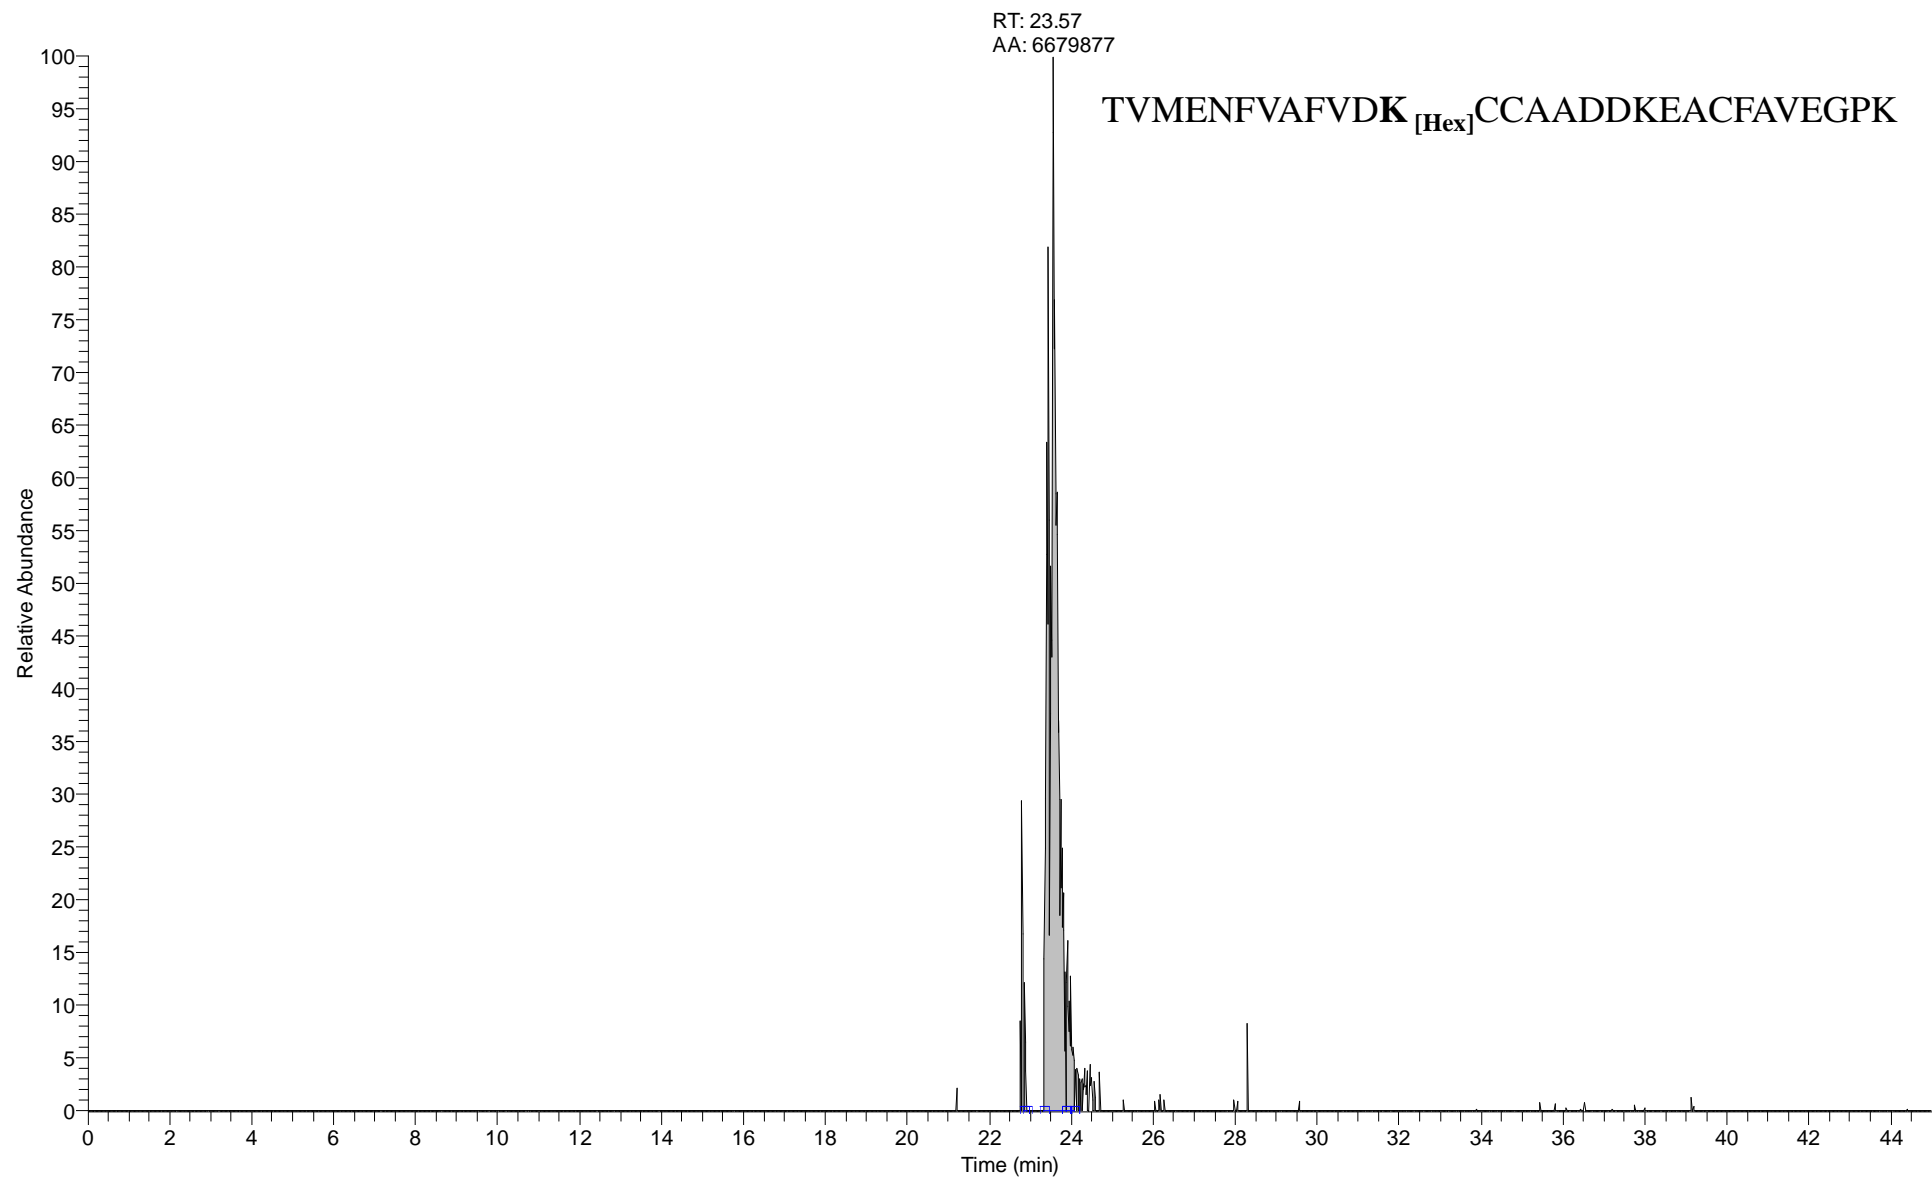

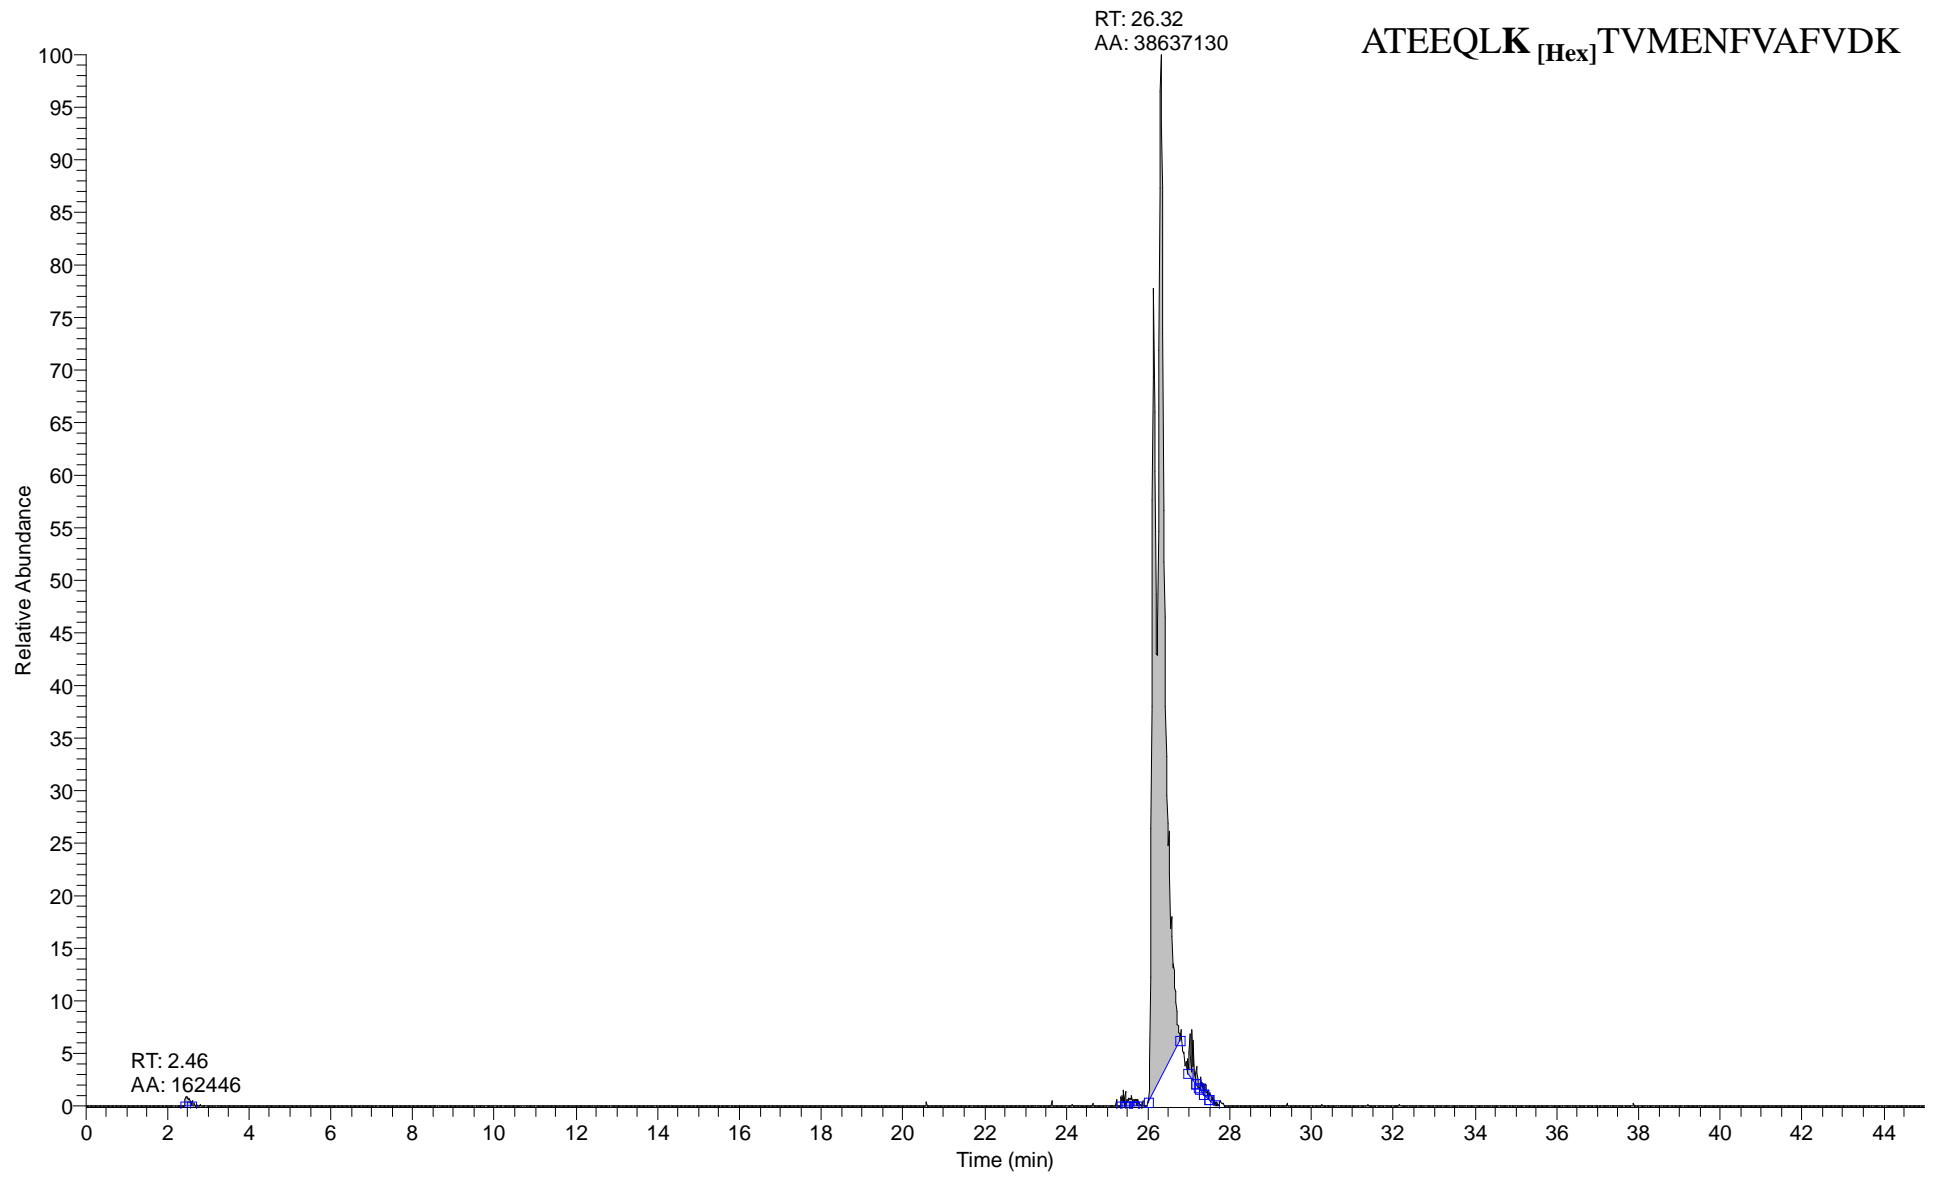

FK<sub>[Hex]</sub>DLGEEHFK

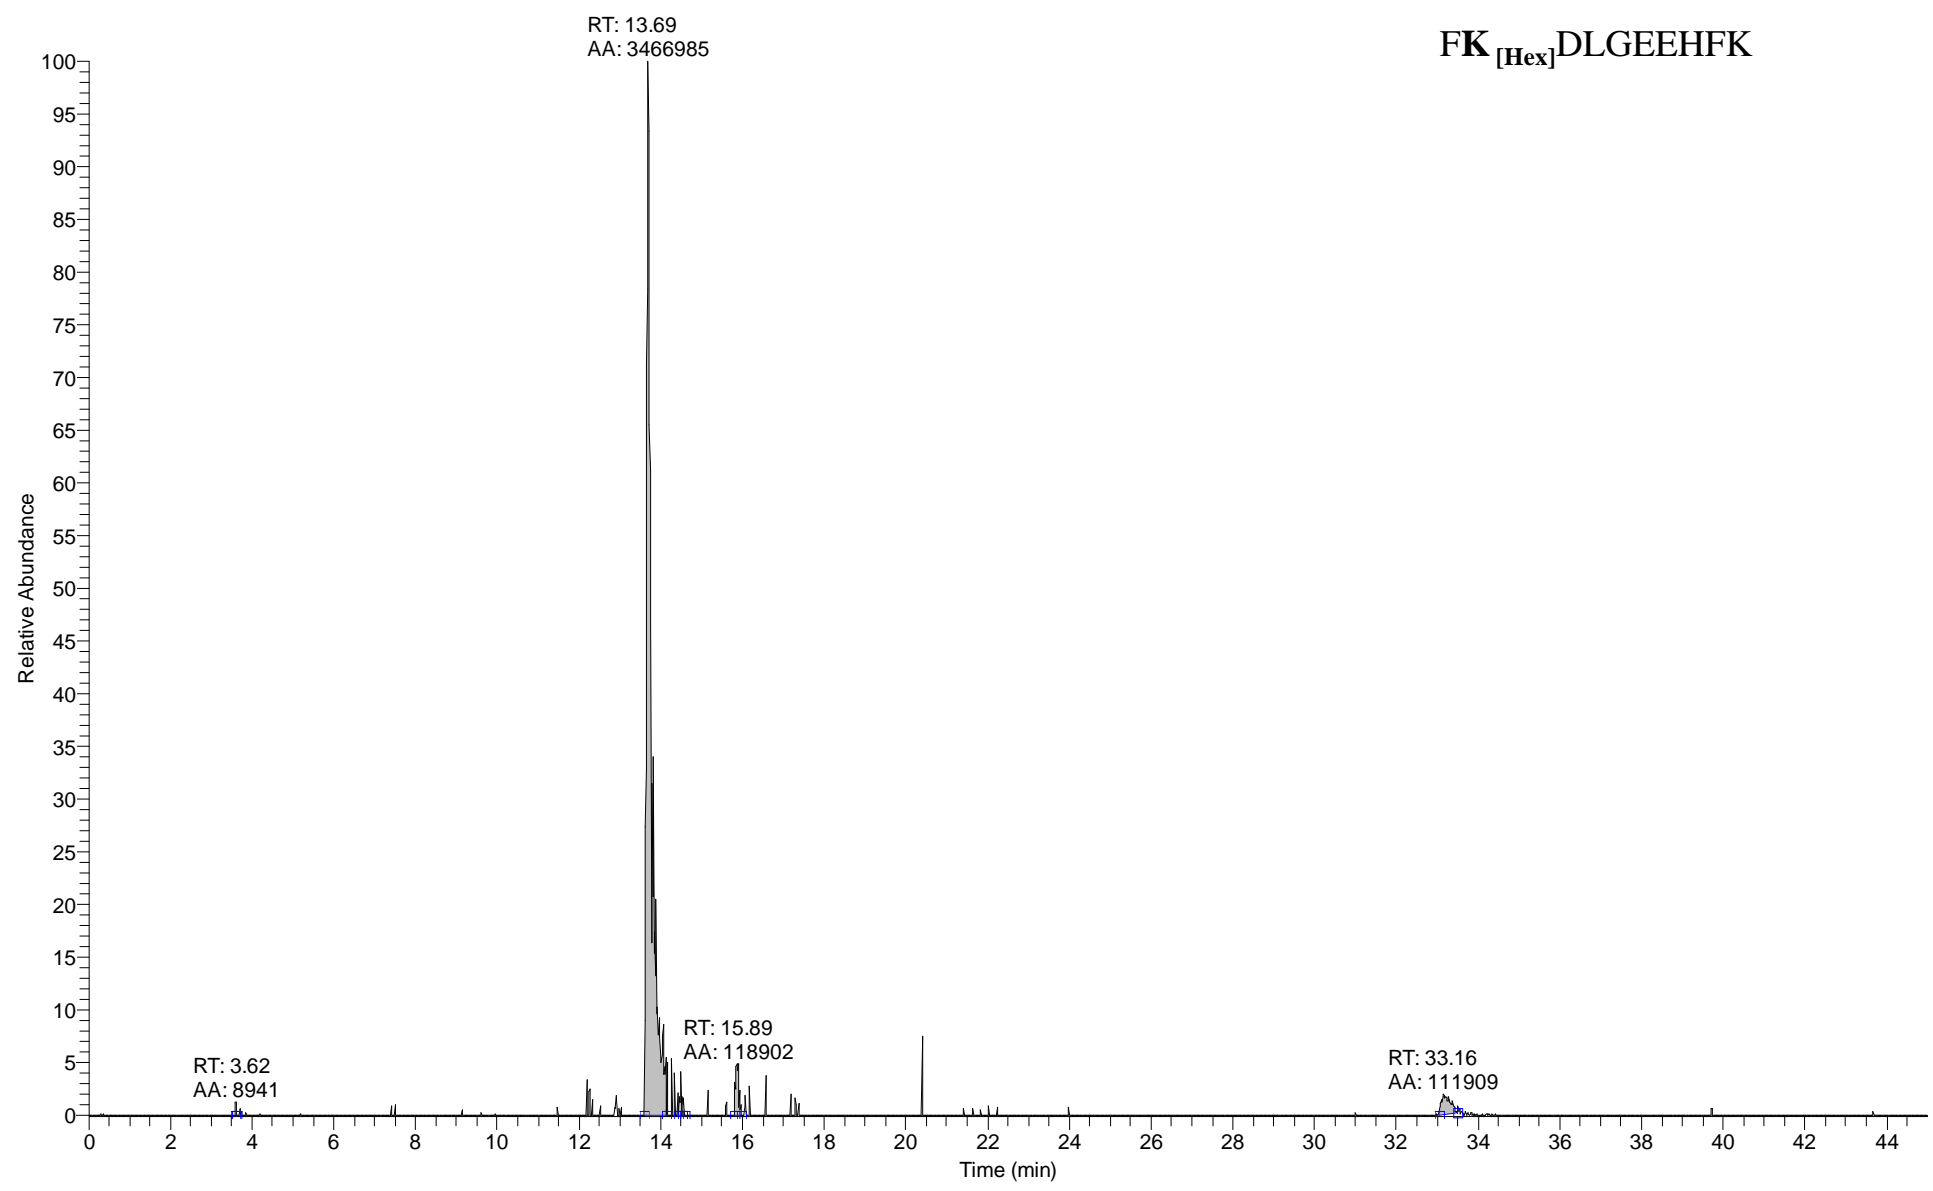

**Glycated modified peptides of BSA treated with Aminoguanidine  
– XIC's**

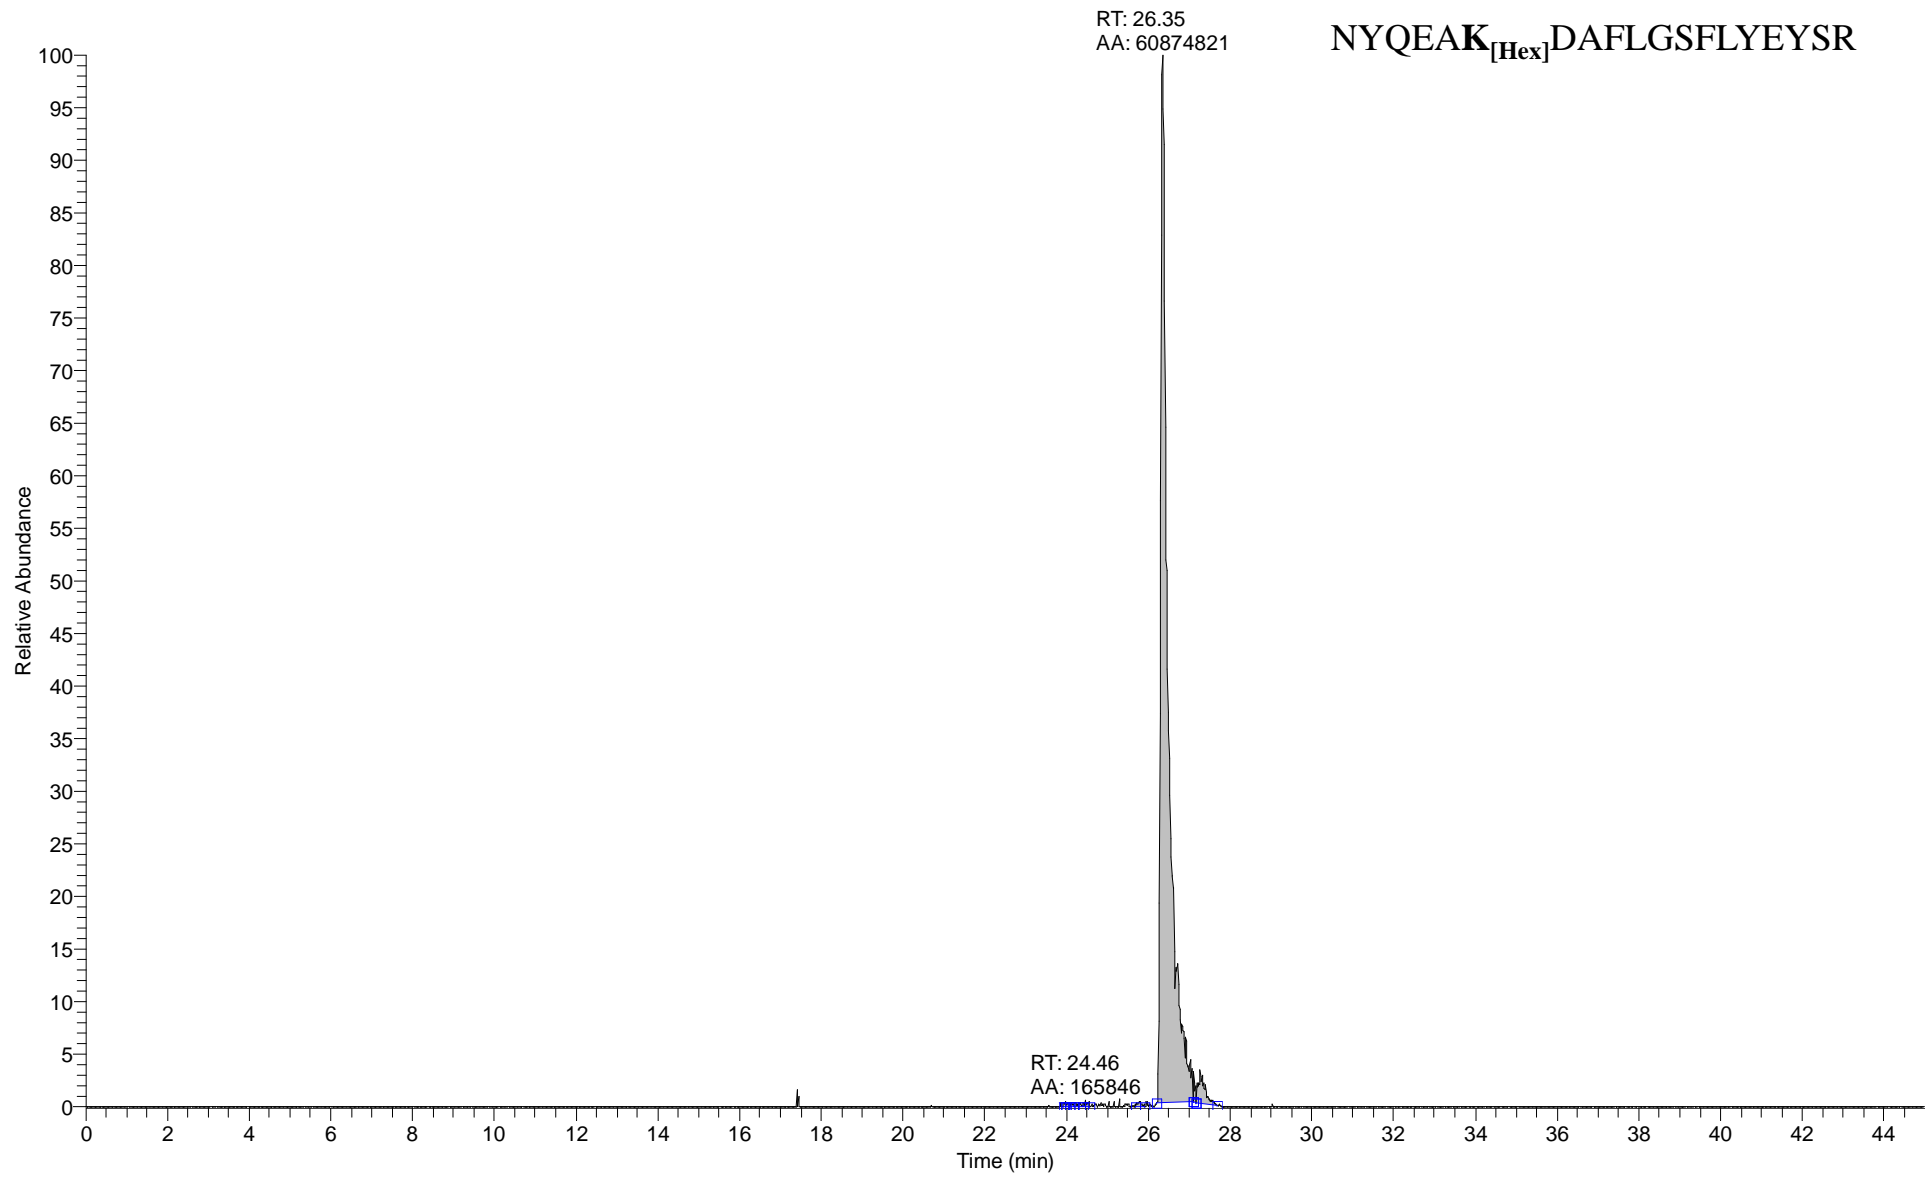



VHK<sub>[Hex]</sub>ECCHGDLLECADDRADLAK

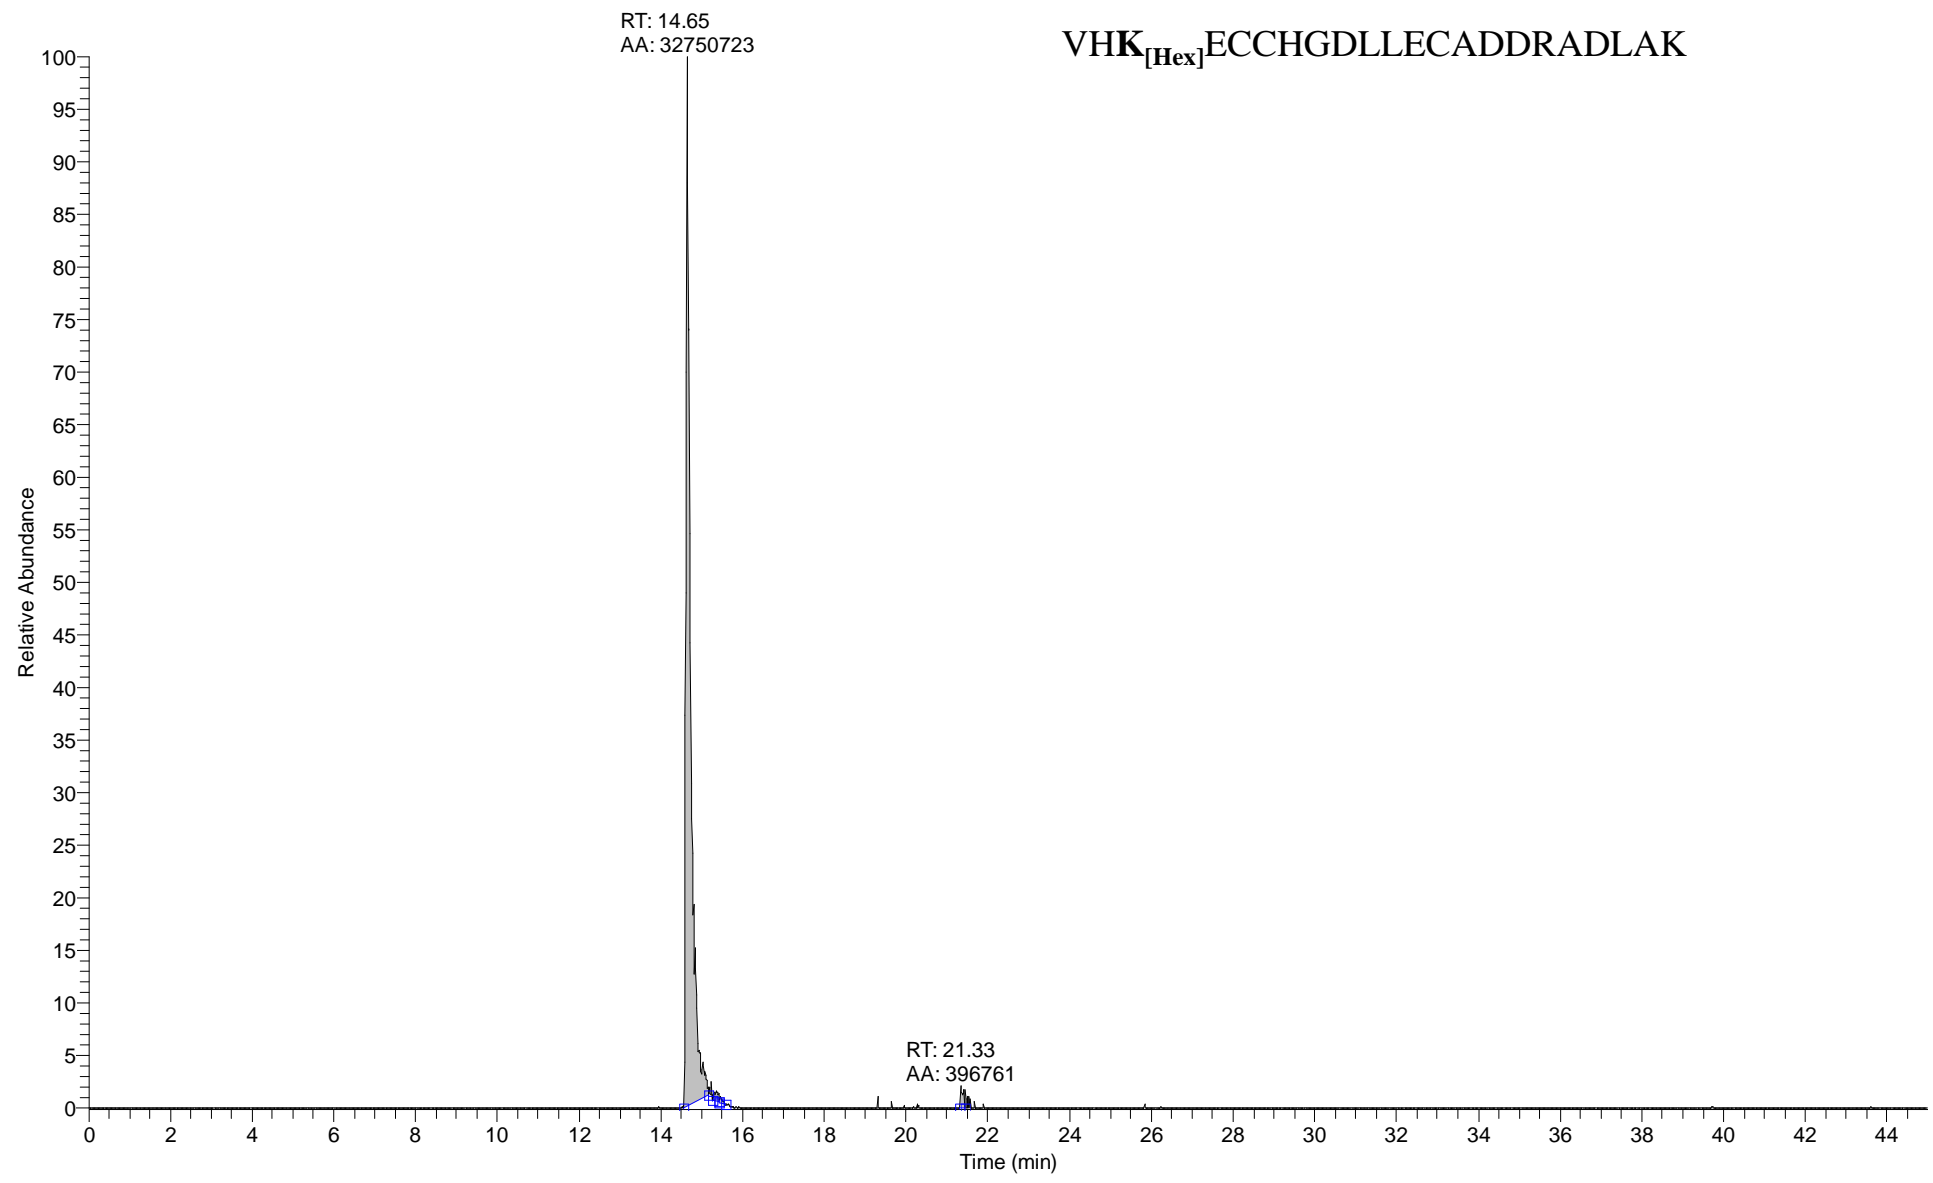

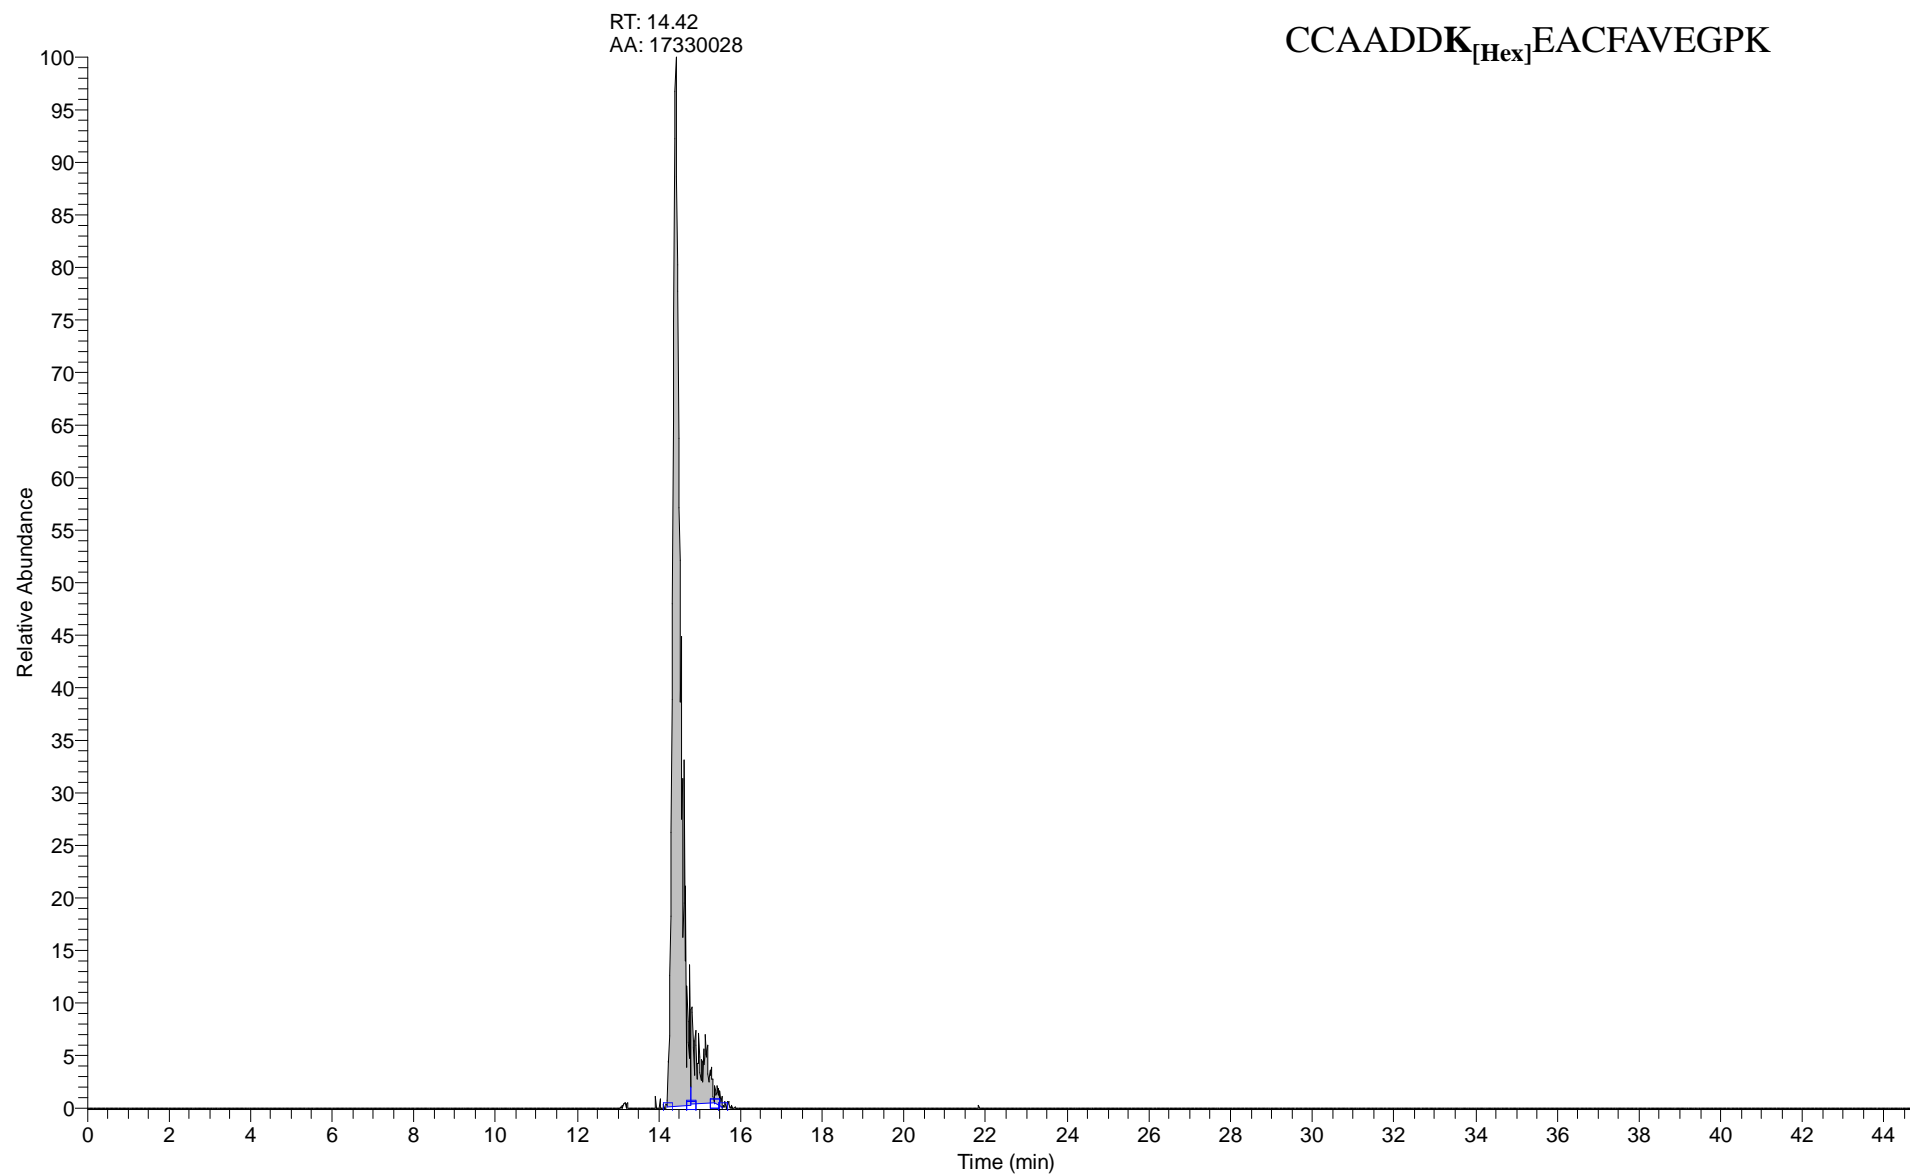

**K<sub>[Hex]</sub>VPQVSTPTLVEVSR**

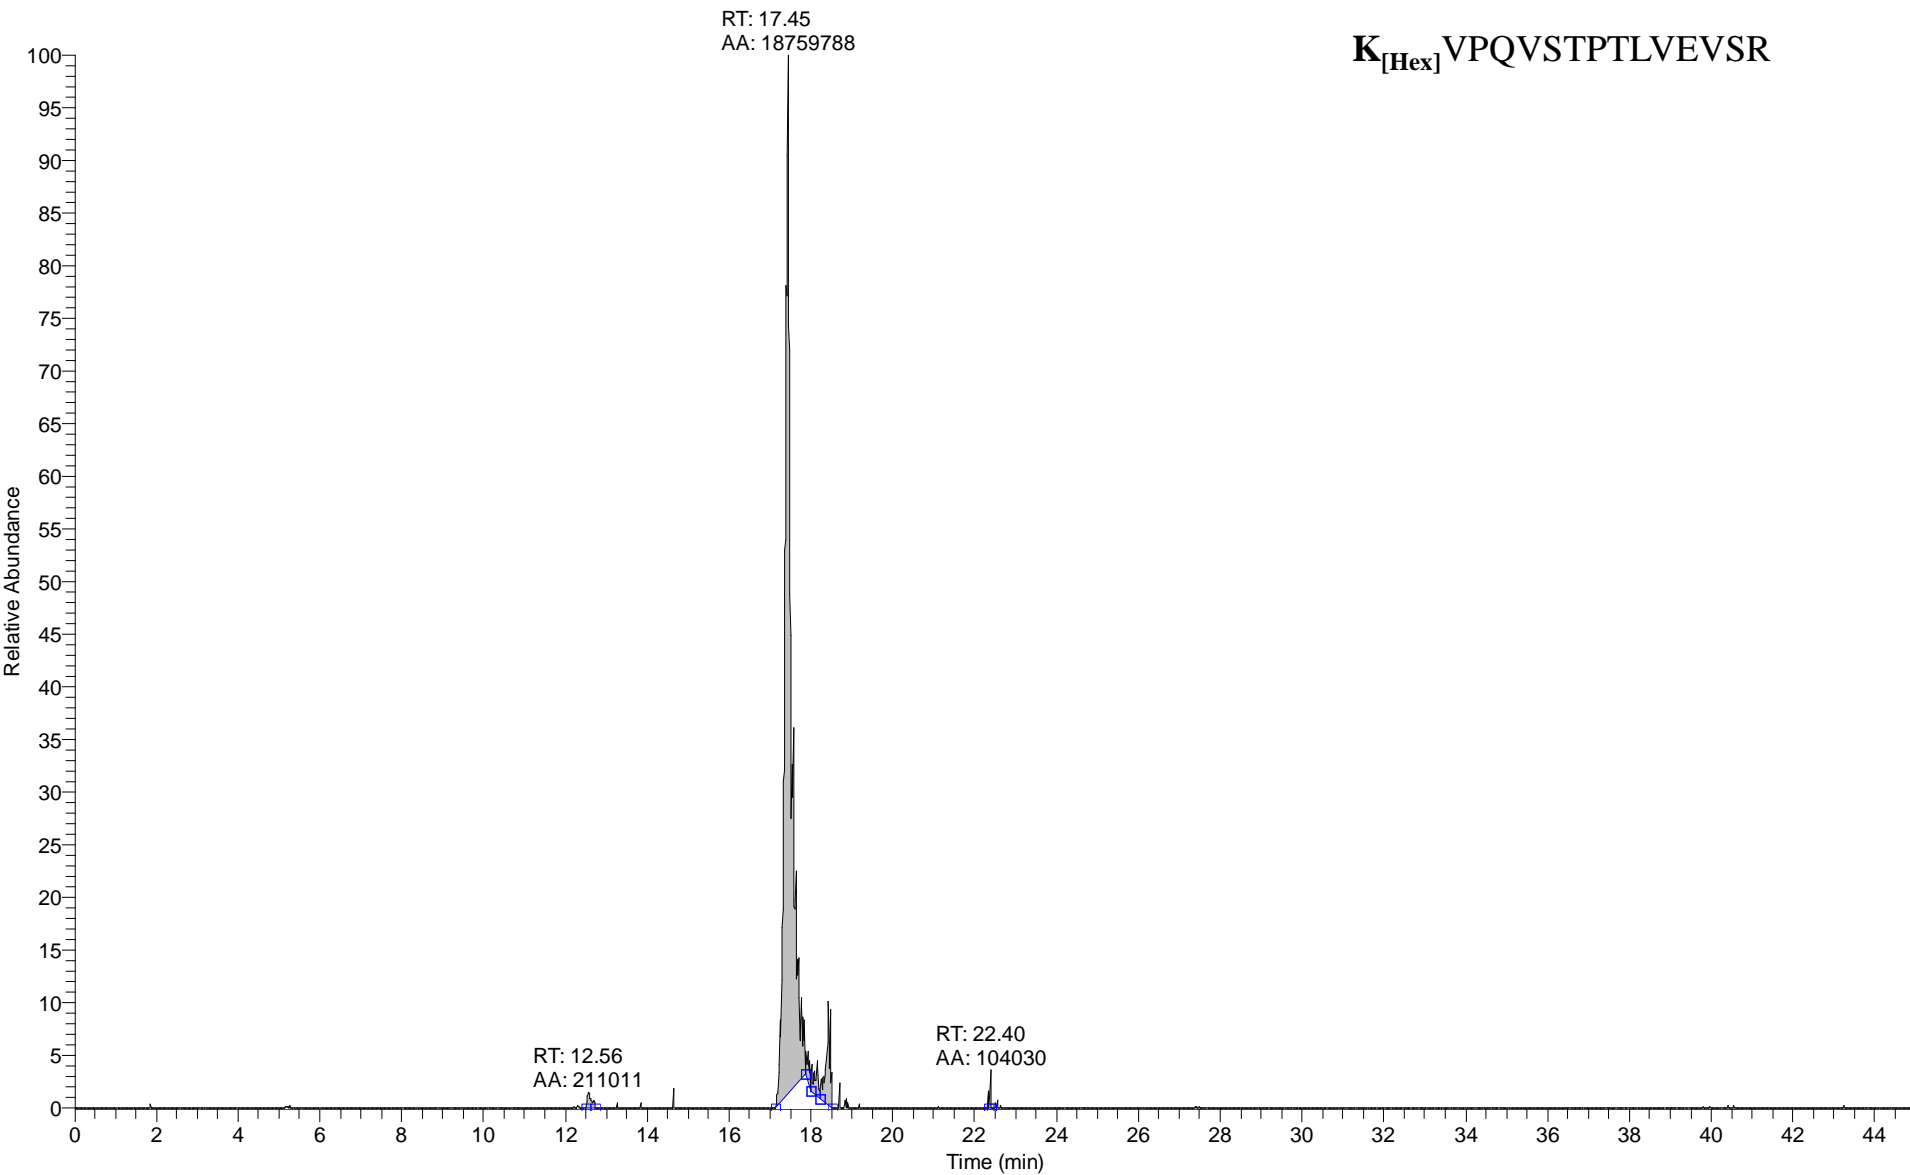

RT: 17.45  
AA: 18759788

RT: 12.56  
AA: 211011

RT: 22.40  
AA: 104030

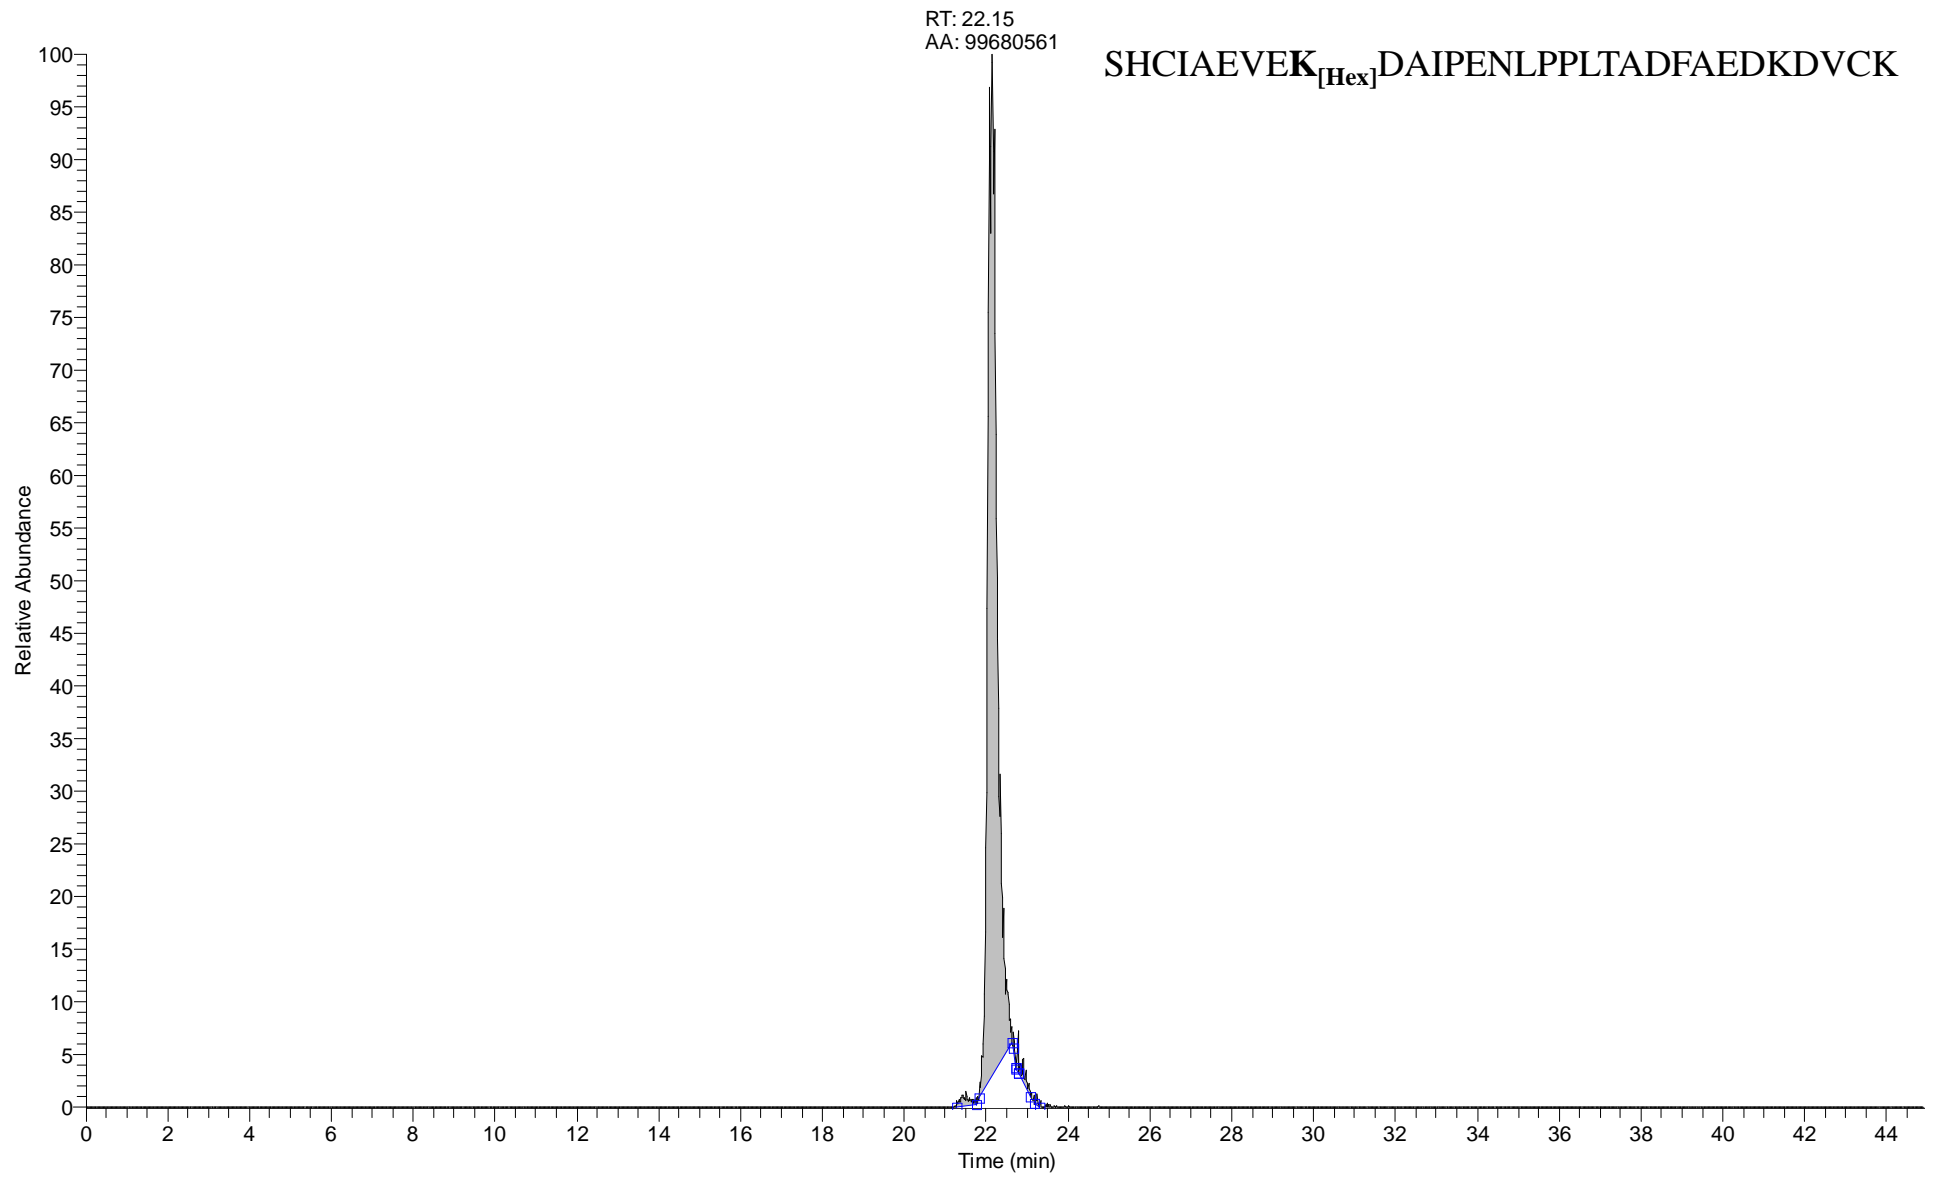

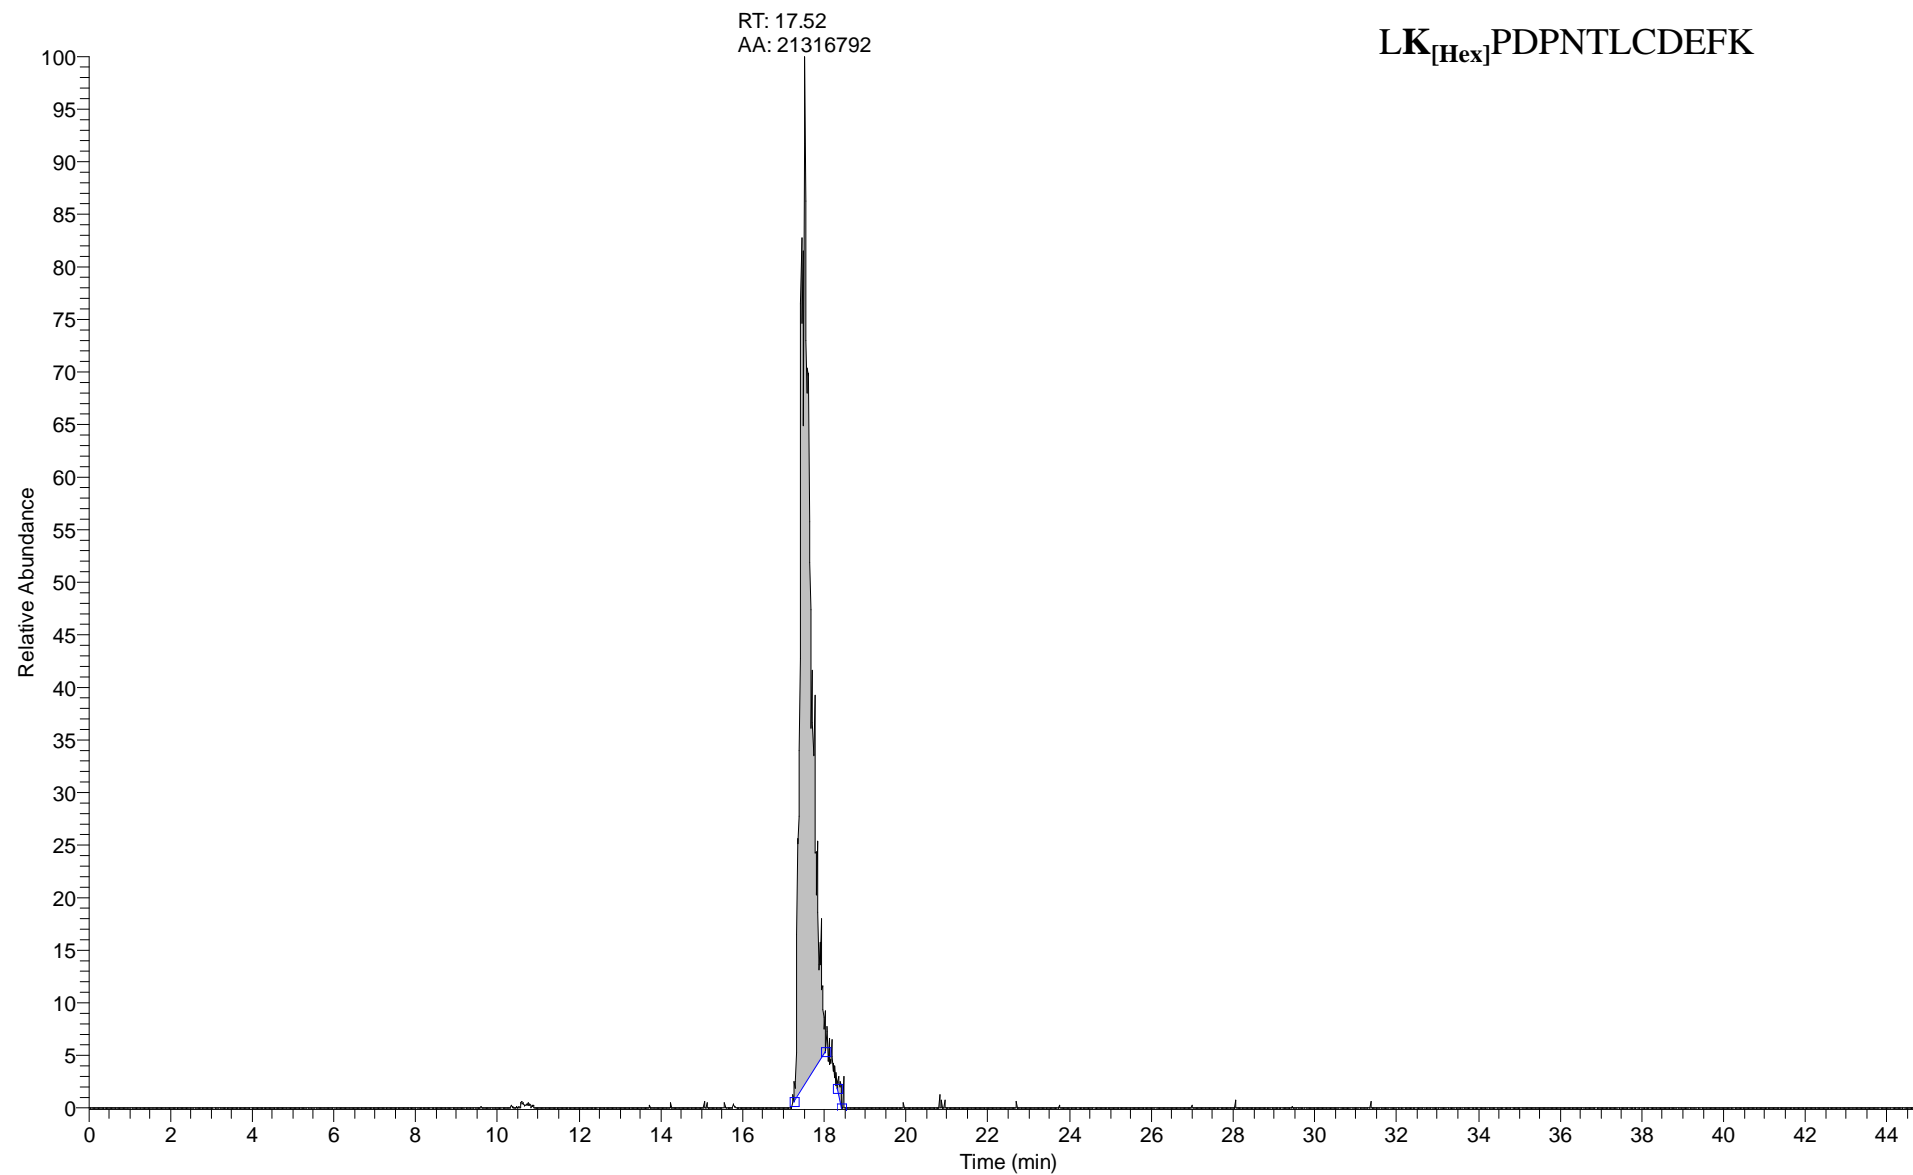

**K<sub>[Hex]</sub>QTALVELLK**

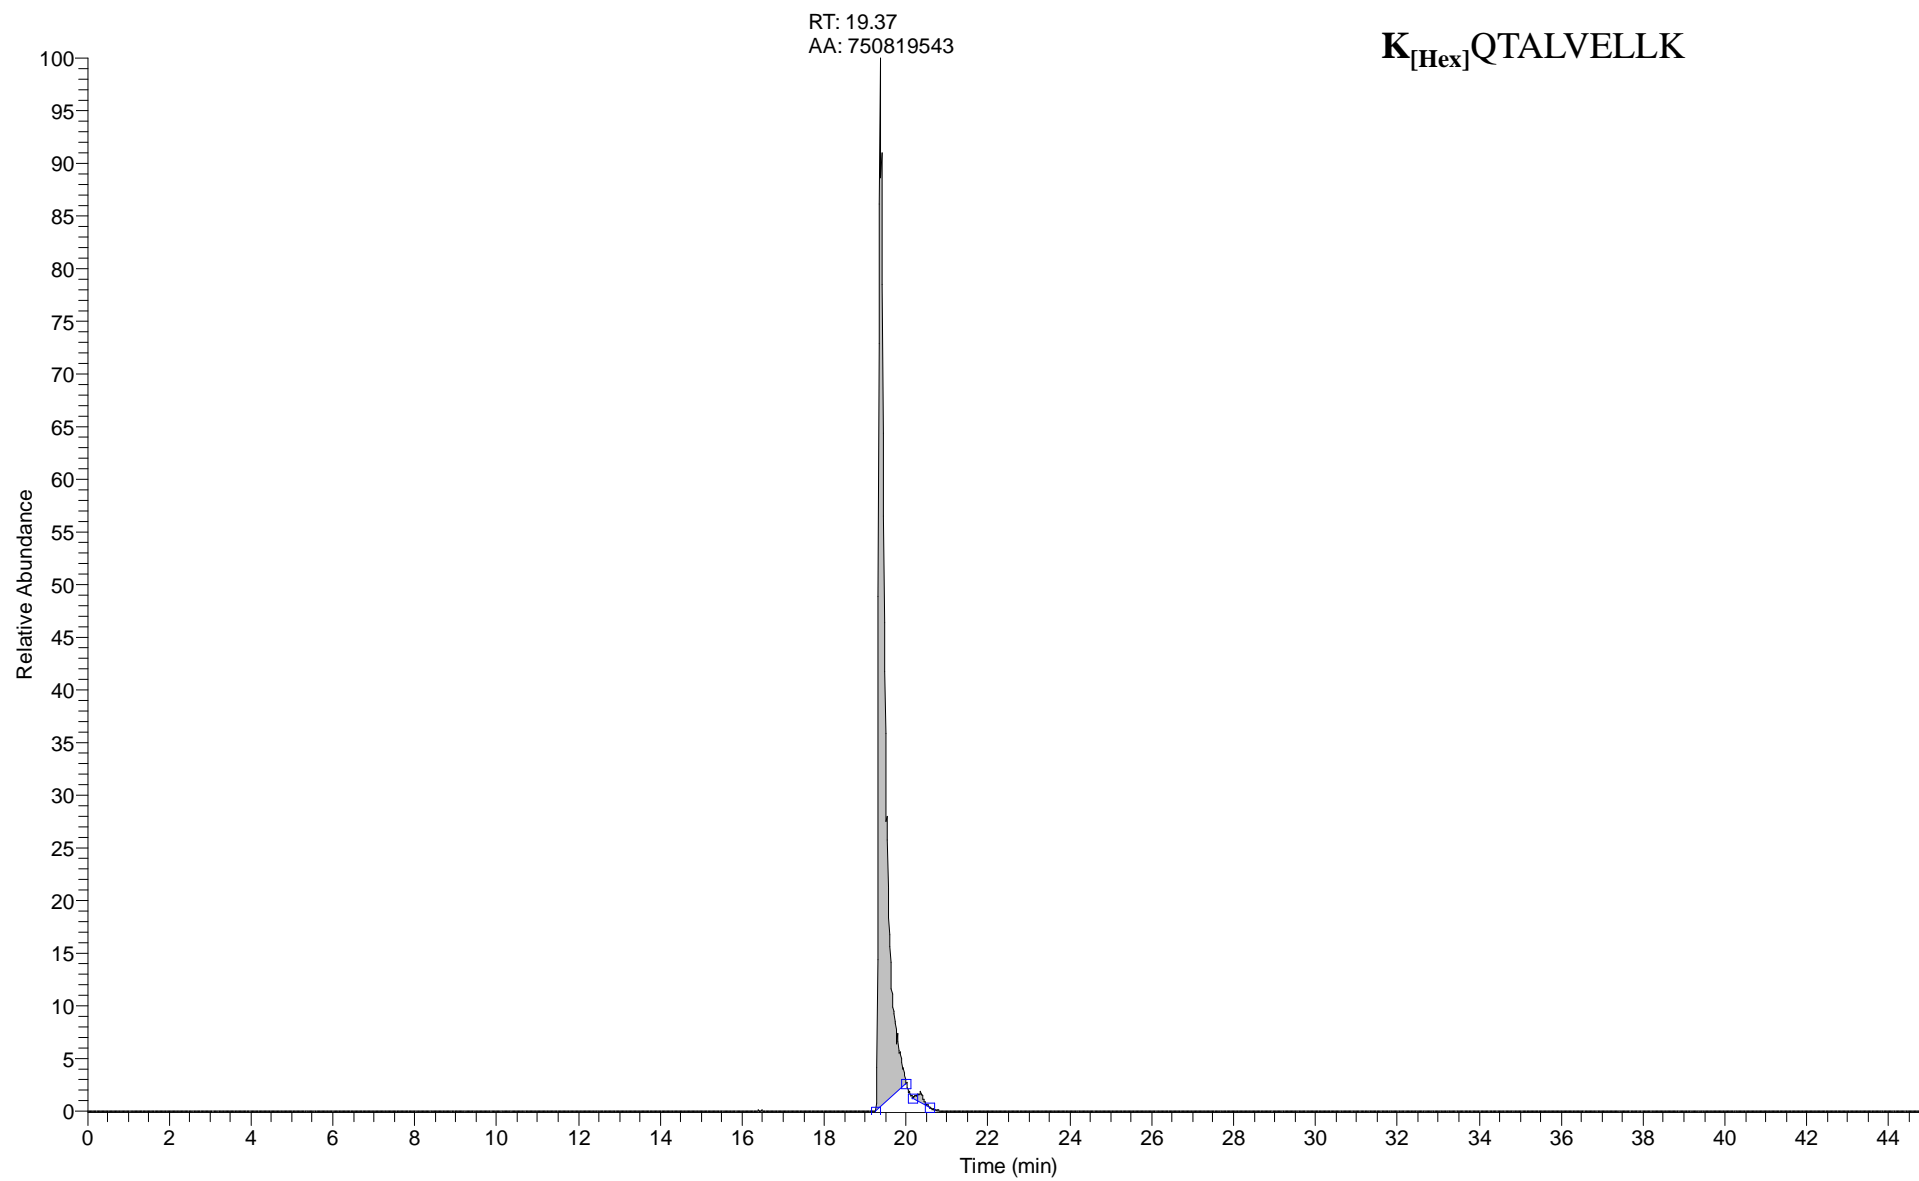

ECCDK<sub>[Hex]</sub>PLLEK

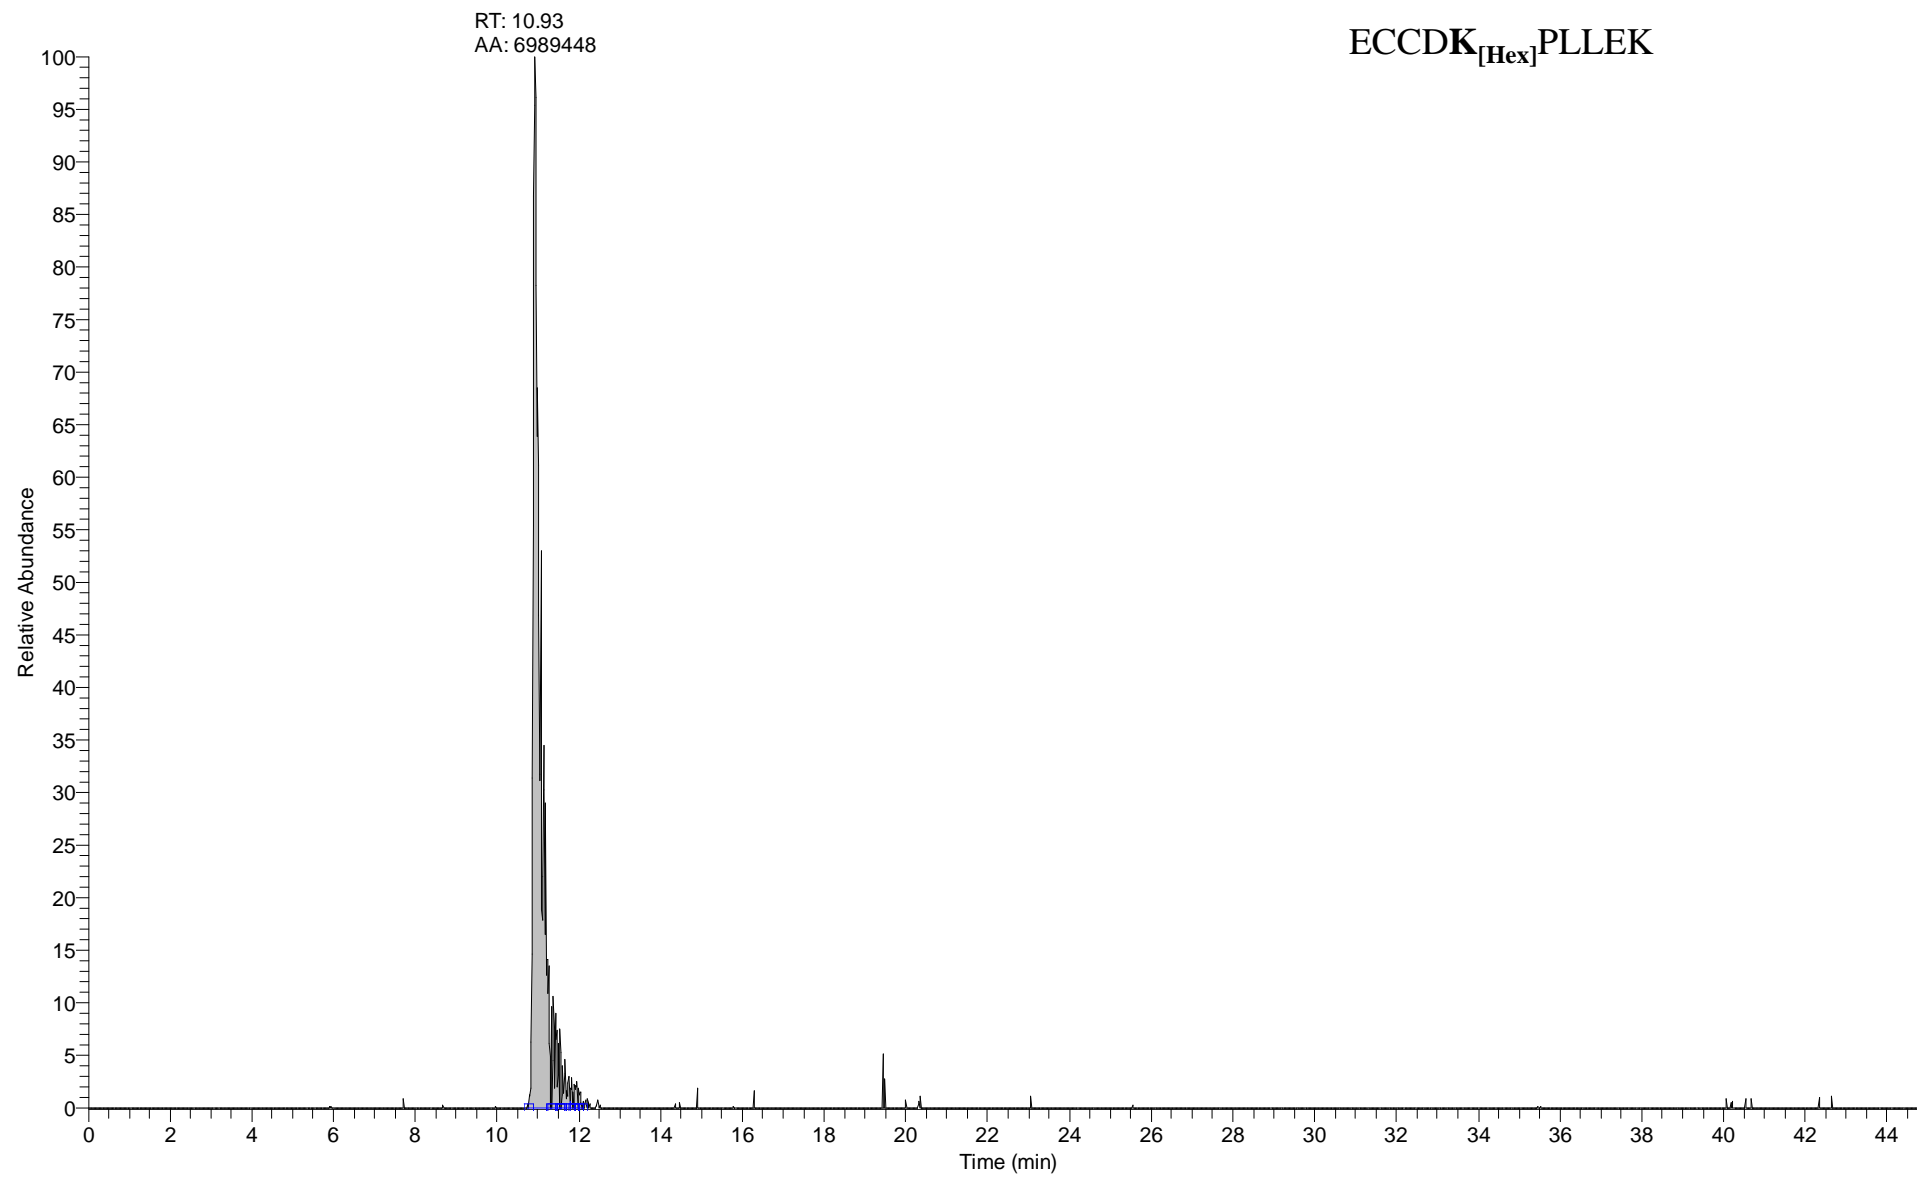

TVMENFVAFVDK [Hex] CCAADDKEACFAVEGPK

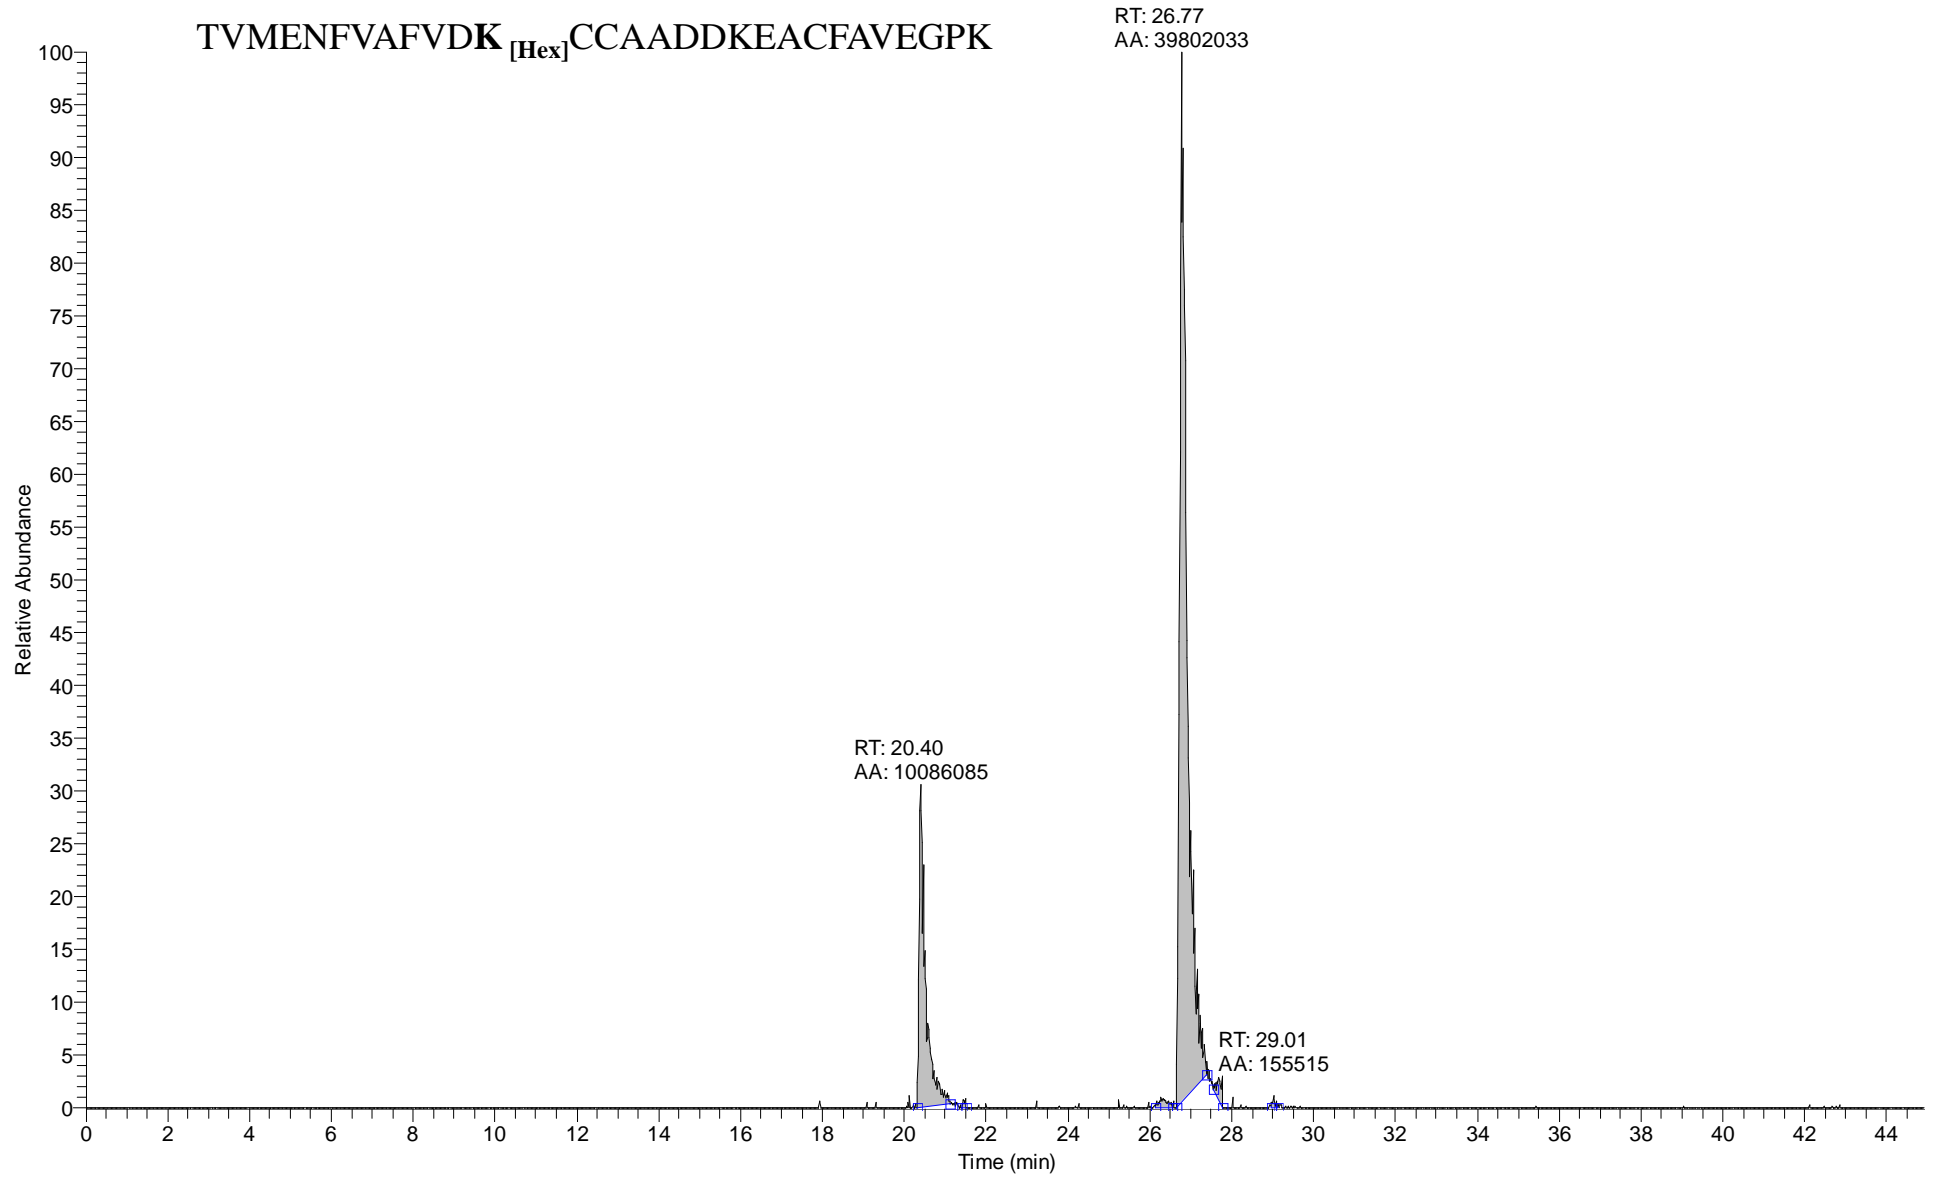



RHPYFYAPPELLYYANK [Hex] YNGVFQECCQAEDK

RT: 25.30  
AA: 15140858

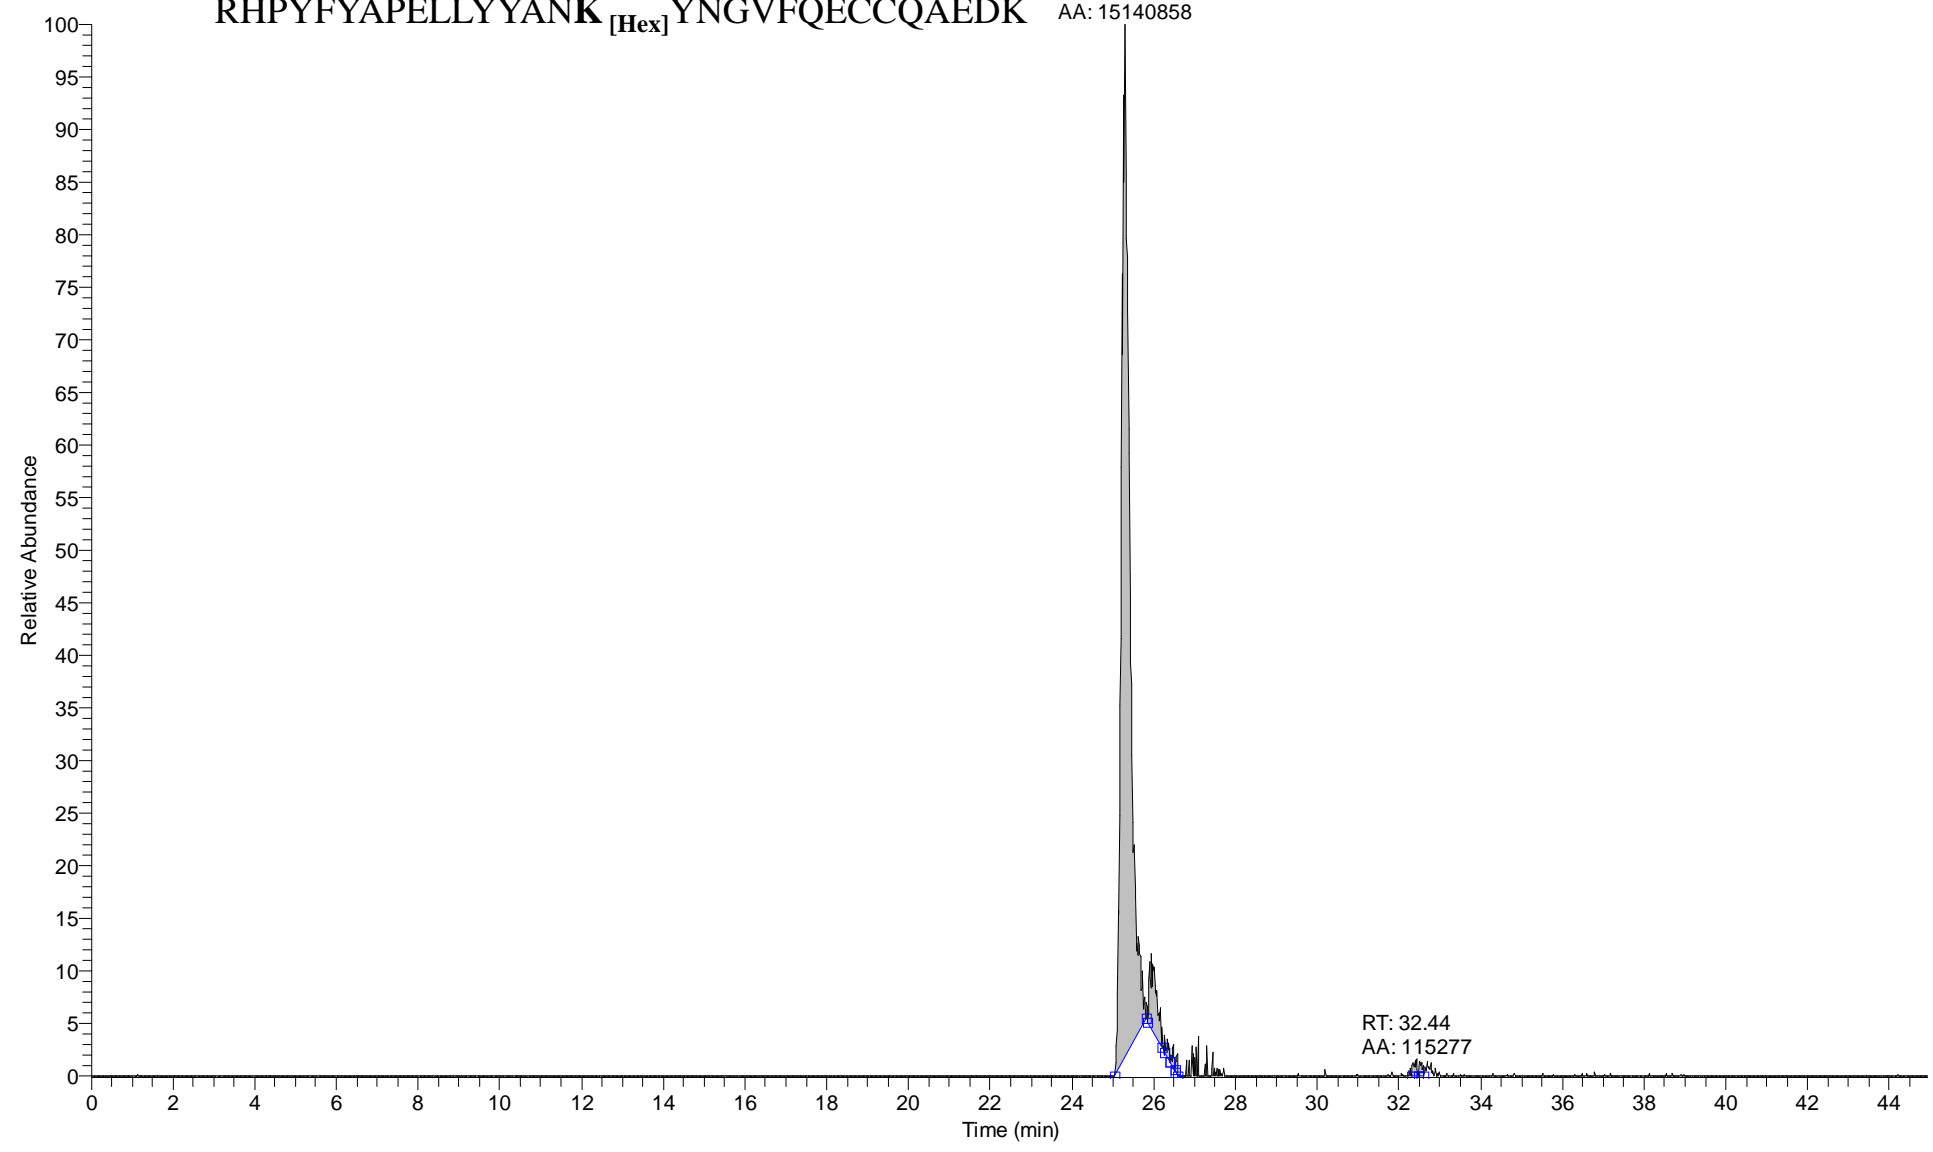

EYEATLEECCA**K** [Hex]DDPHACYSTVFDK

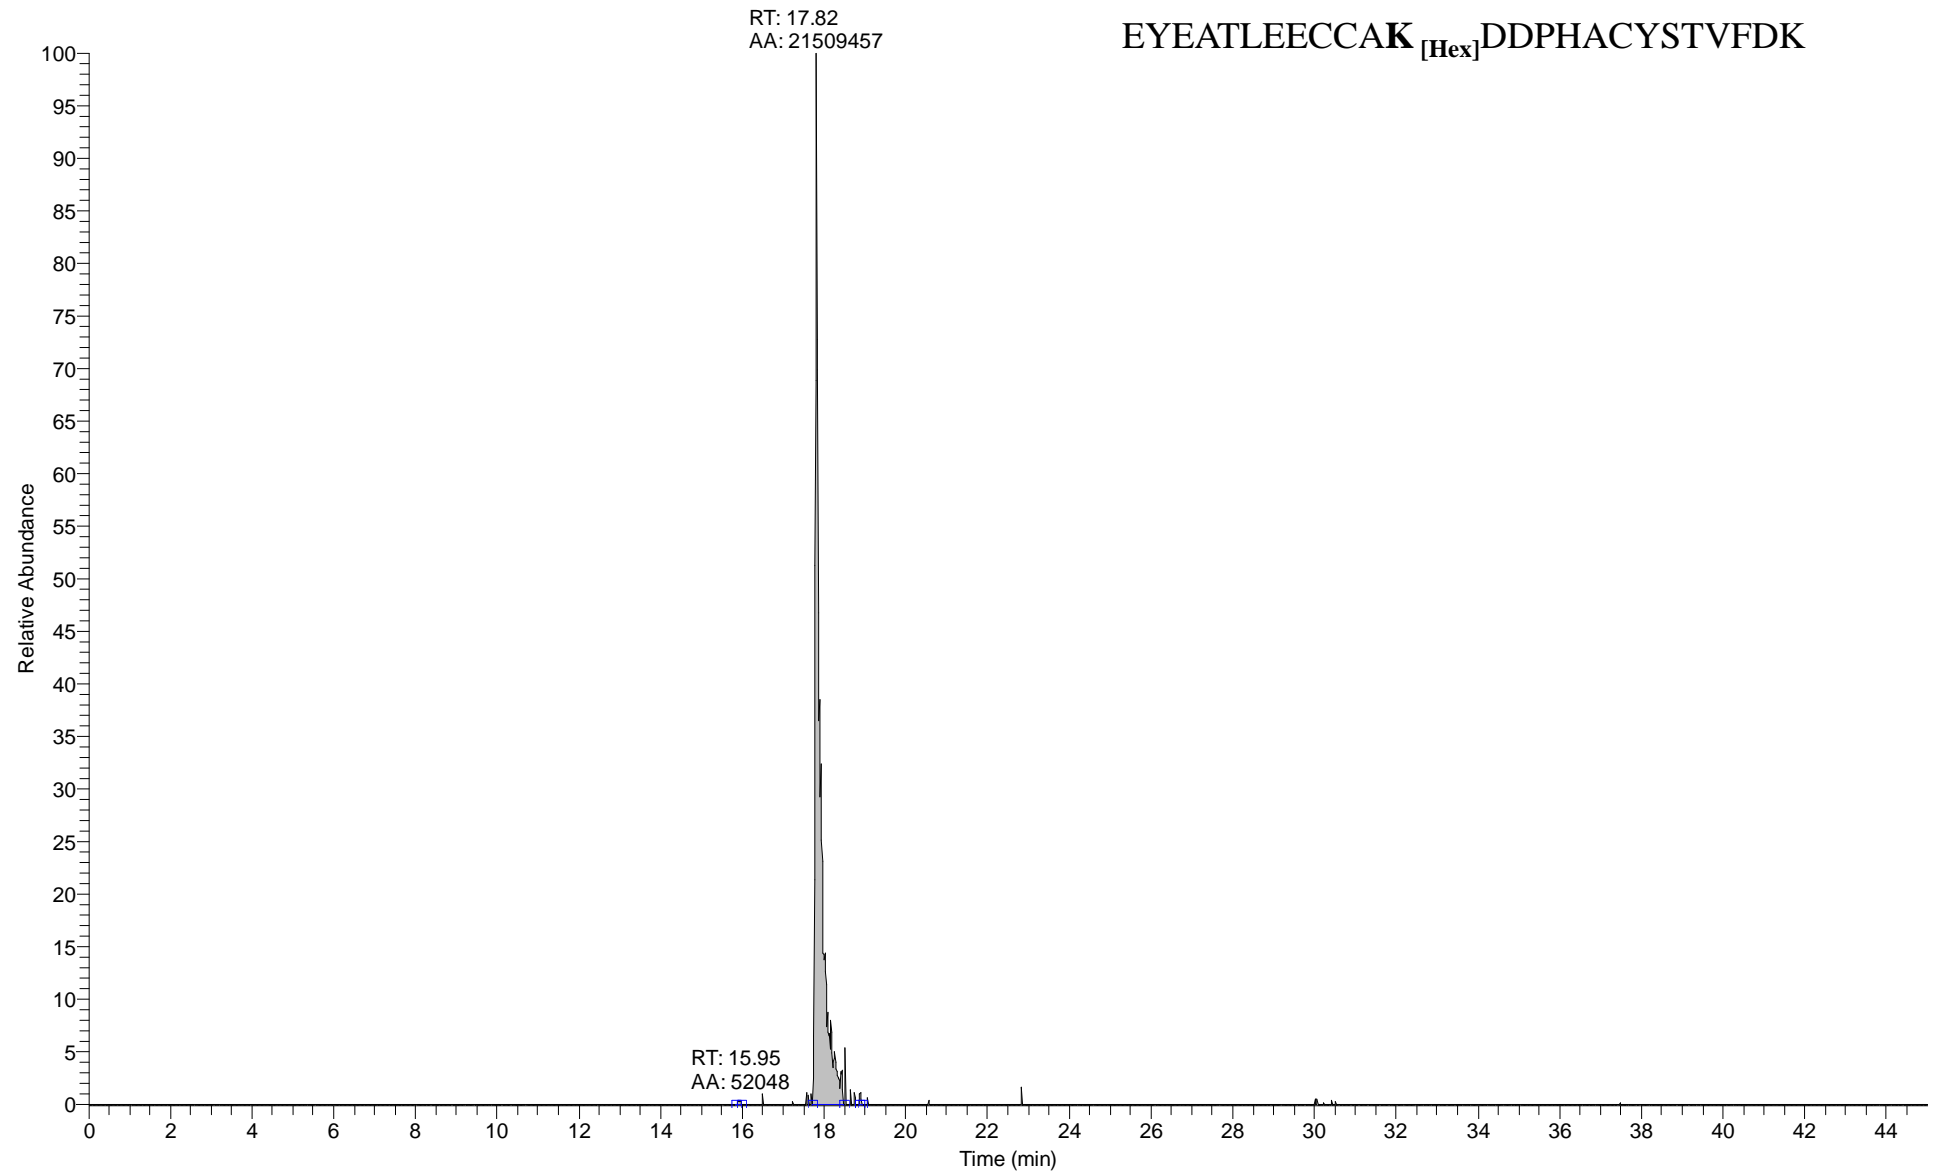

FK<sub>[Hex]</sub>DLGEEHFK

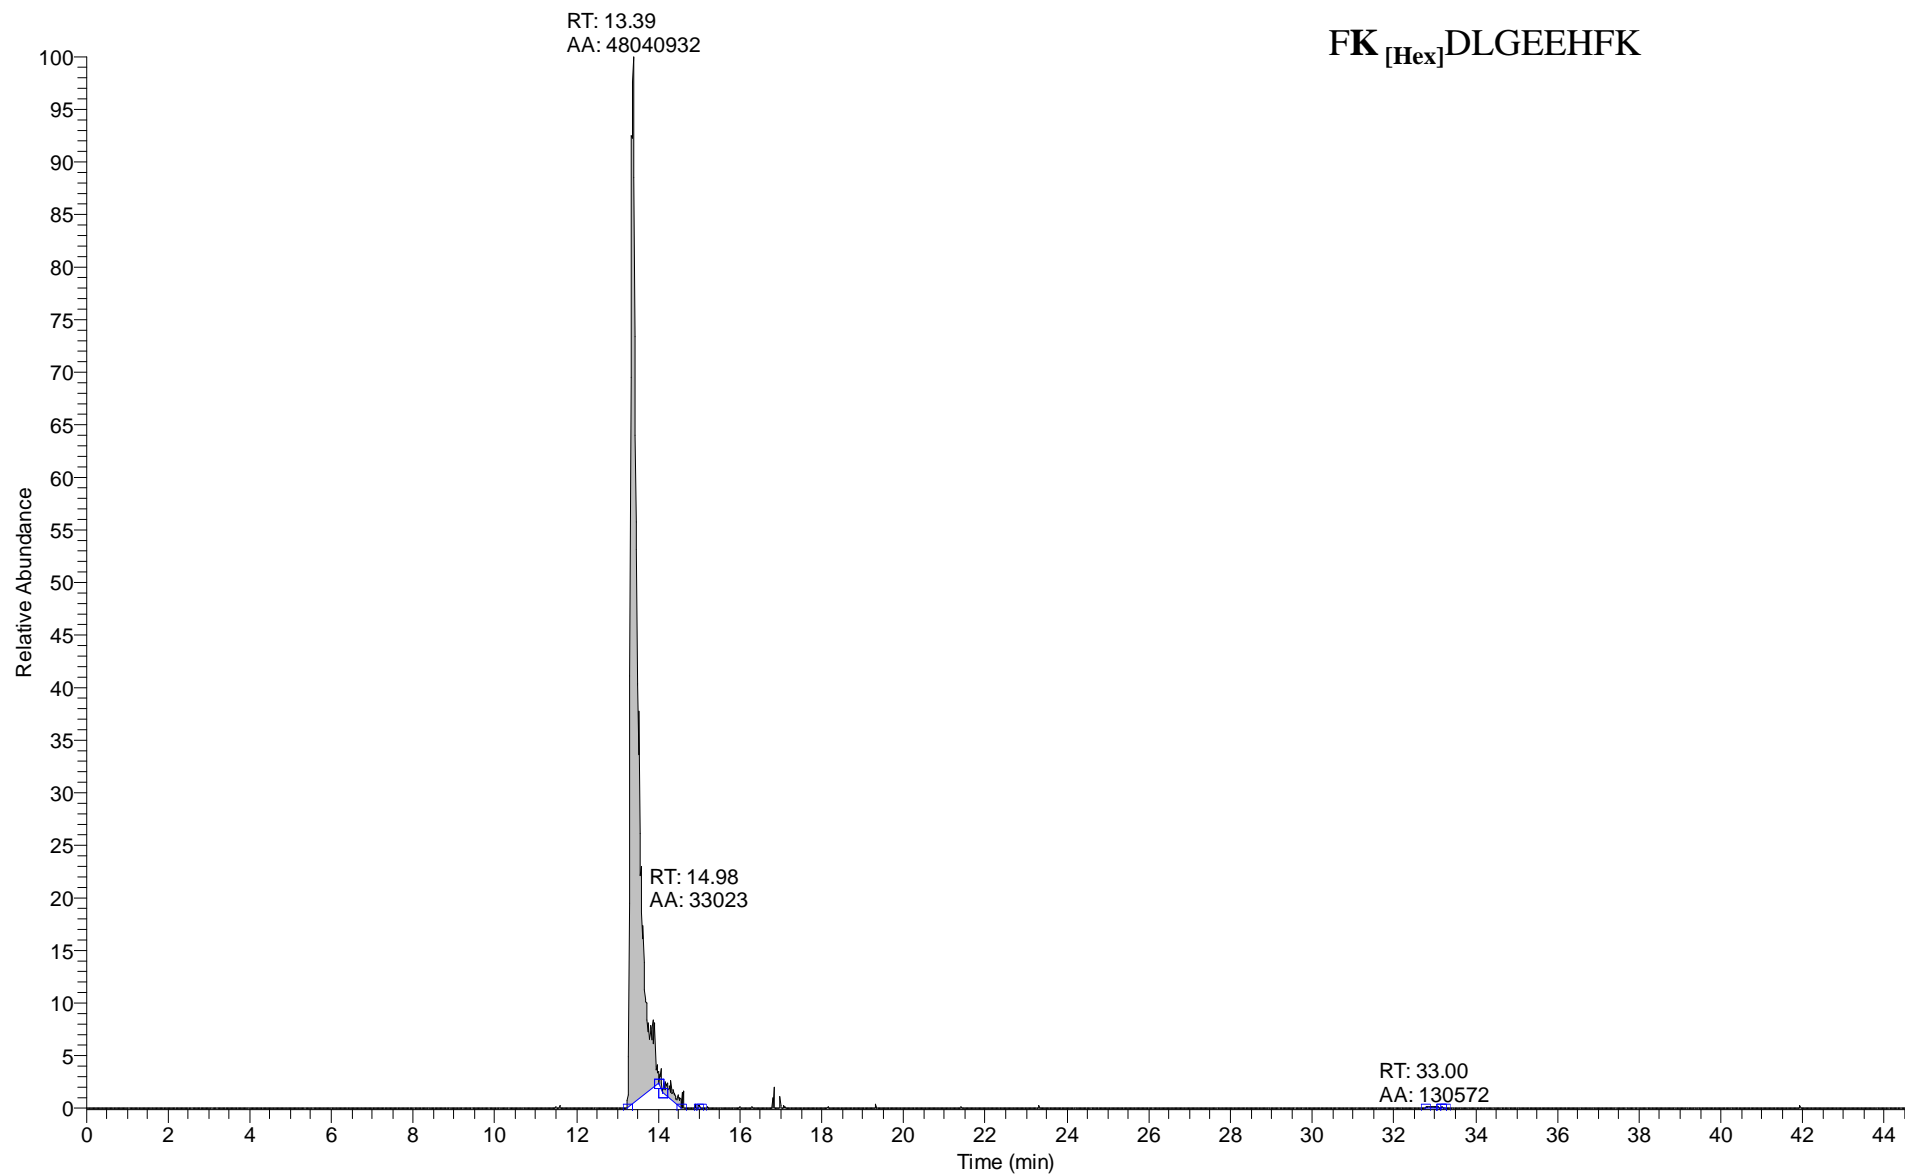

NECFLSHK<sub>[Hex]</sub>DDSPDLPK

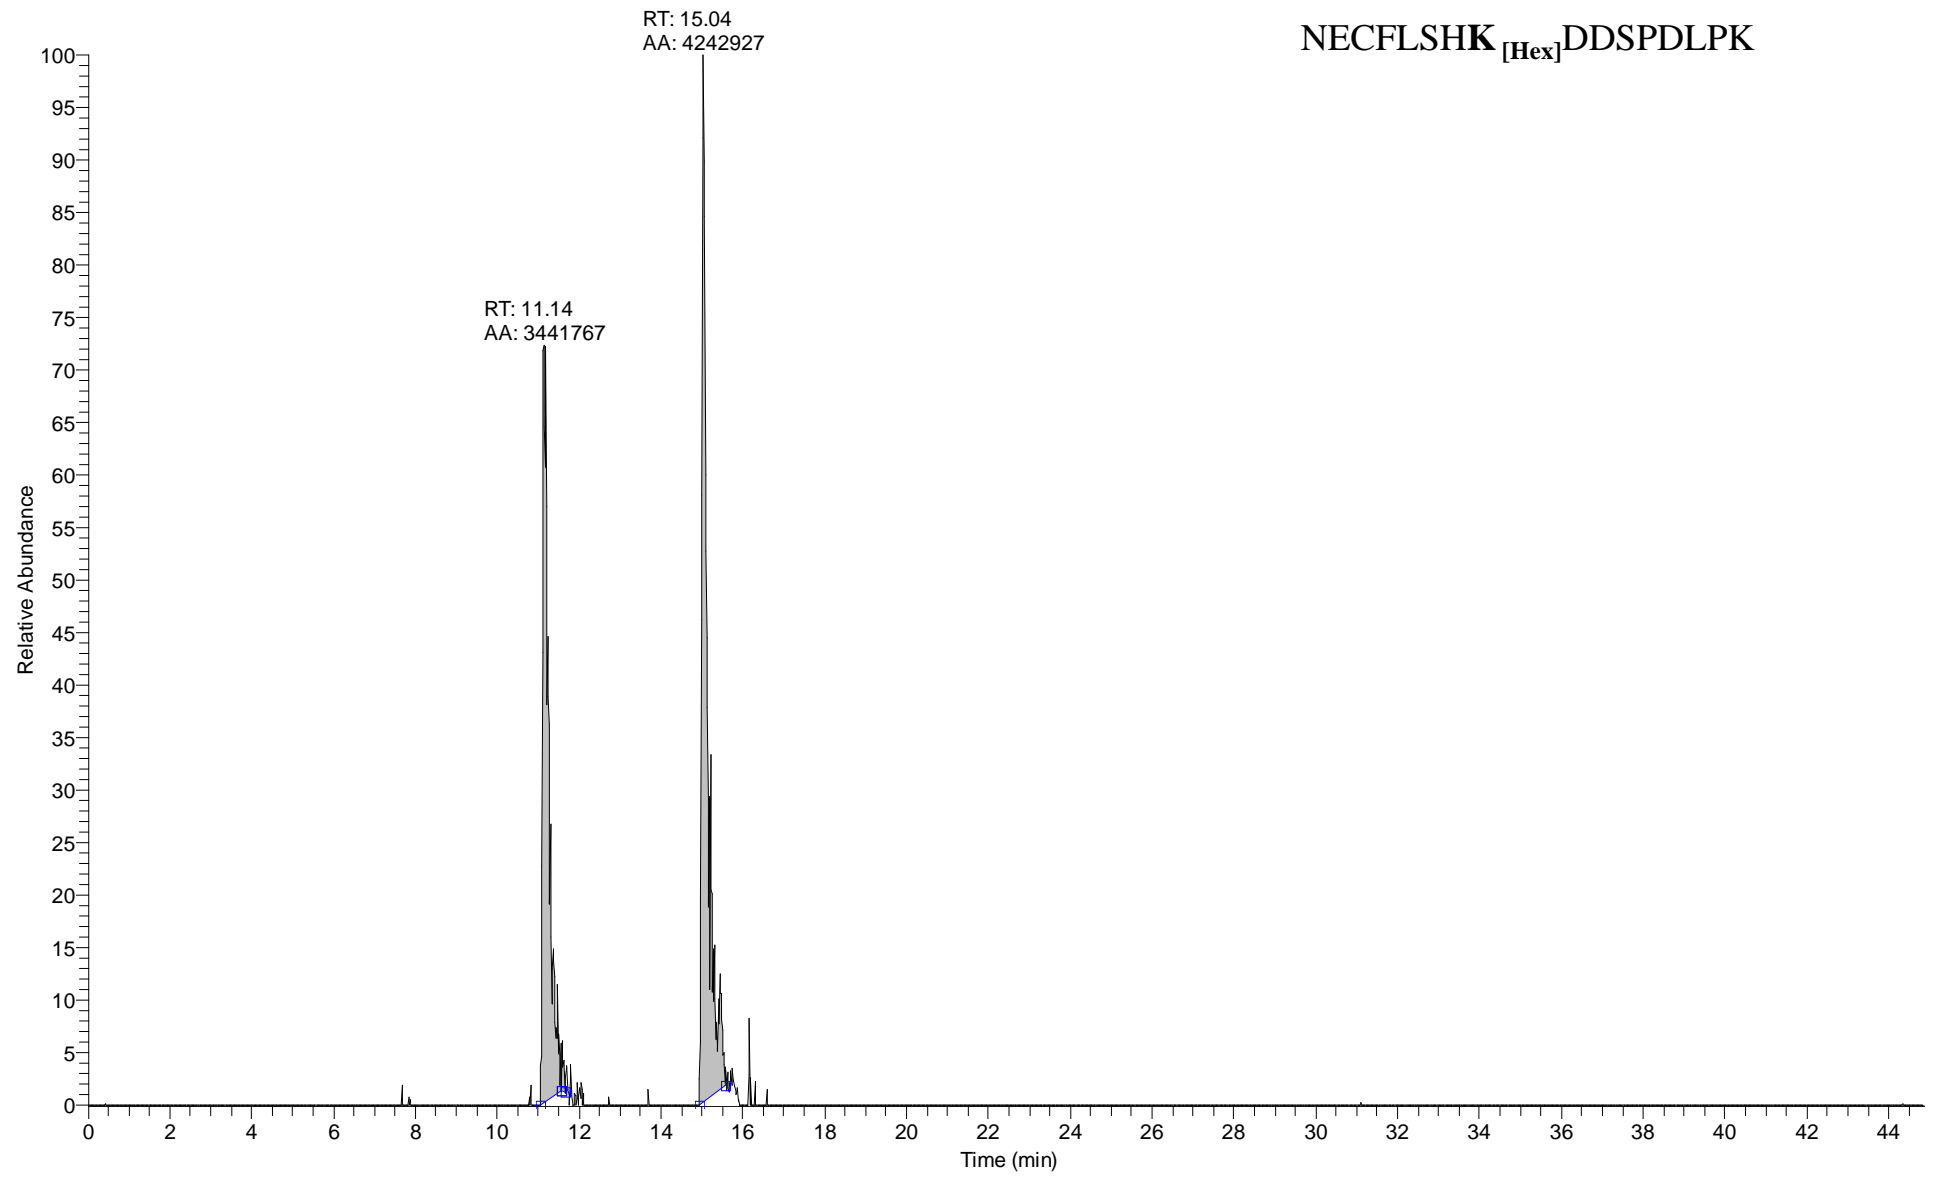

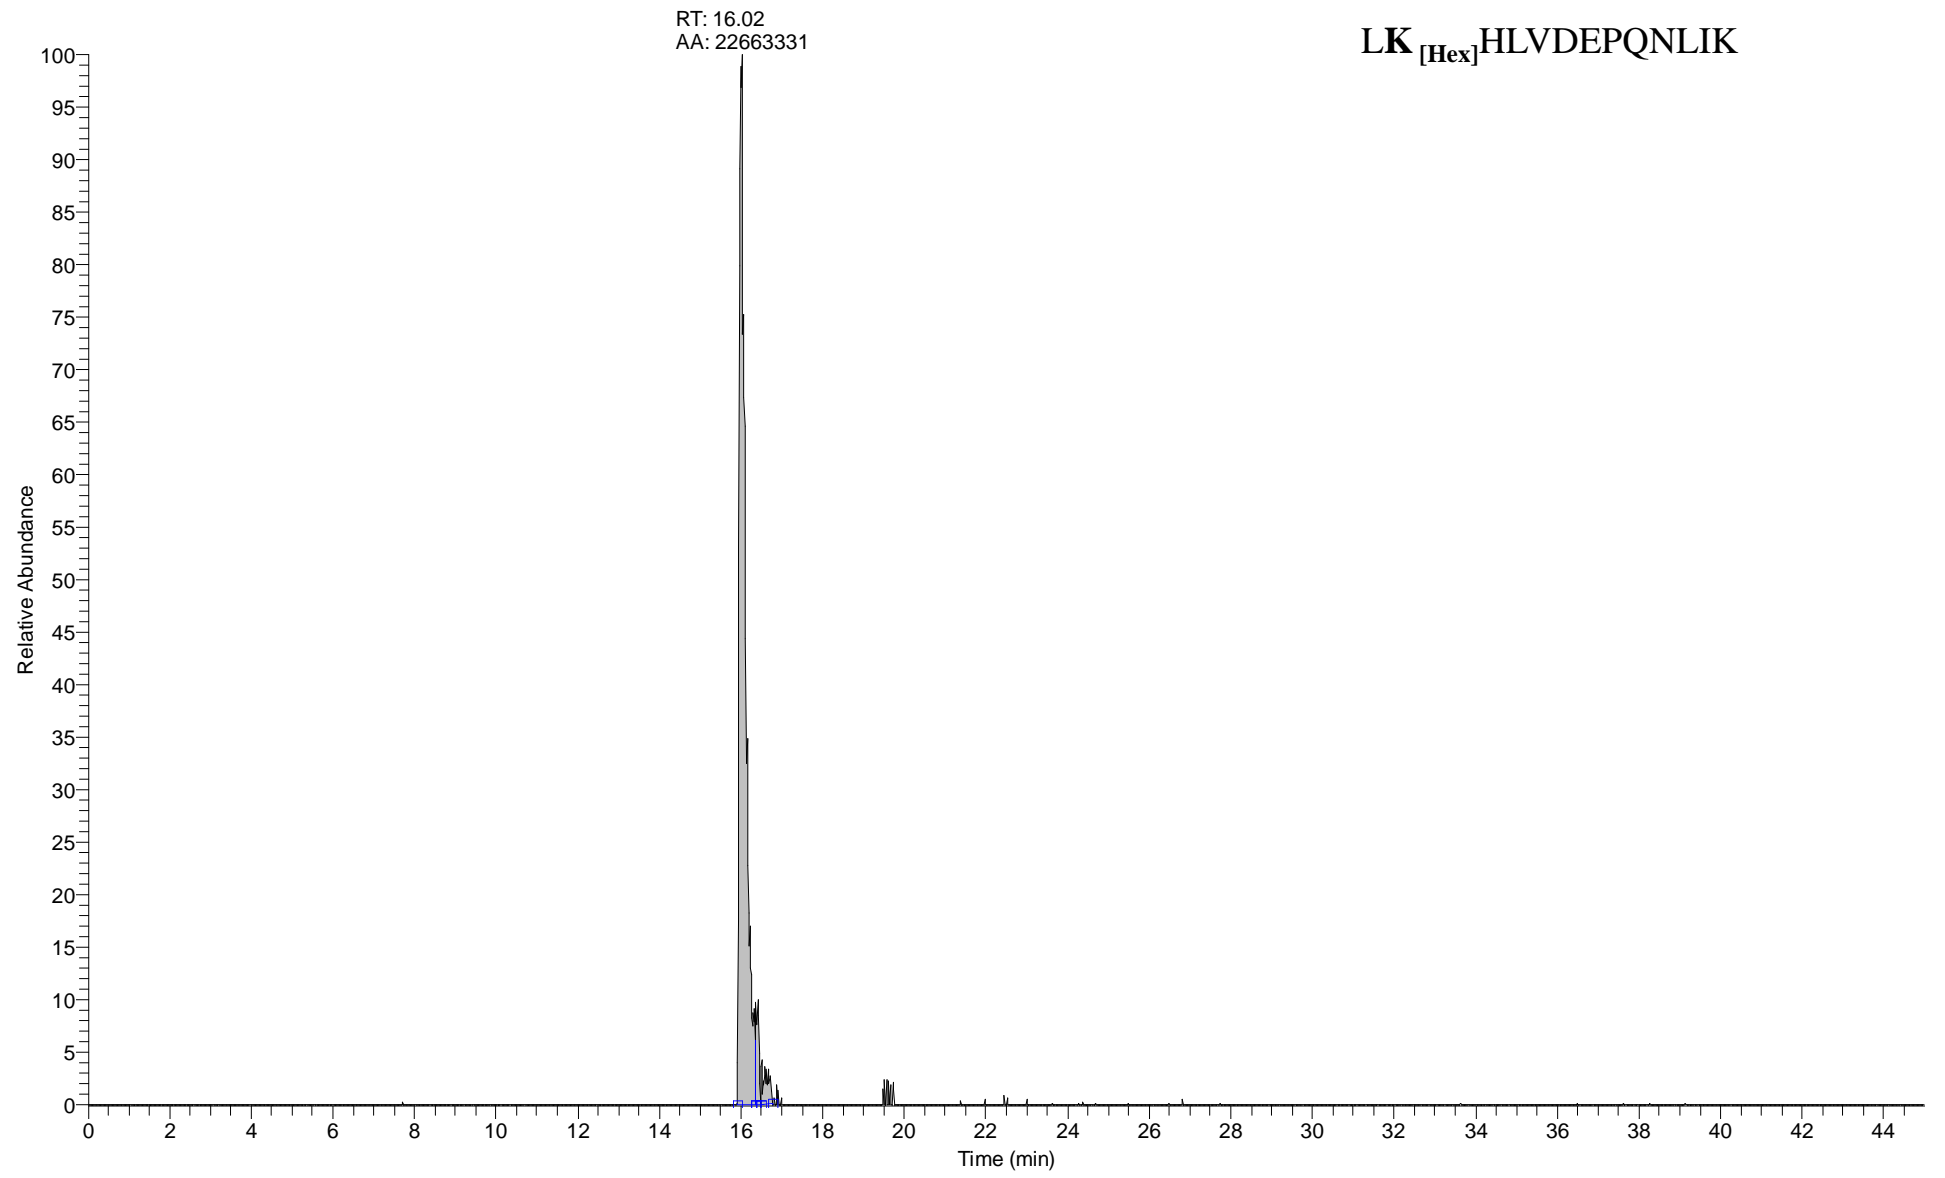

DTHK<sub>[Hex]</sub>SEIAHR

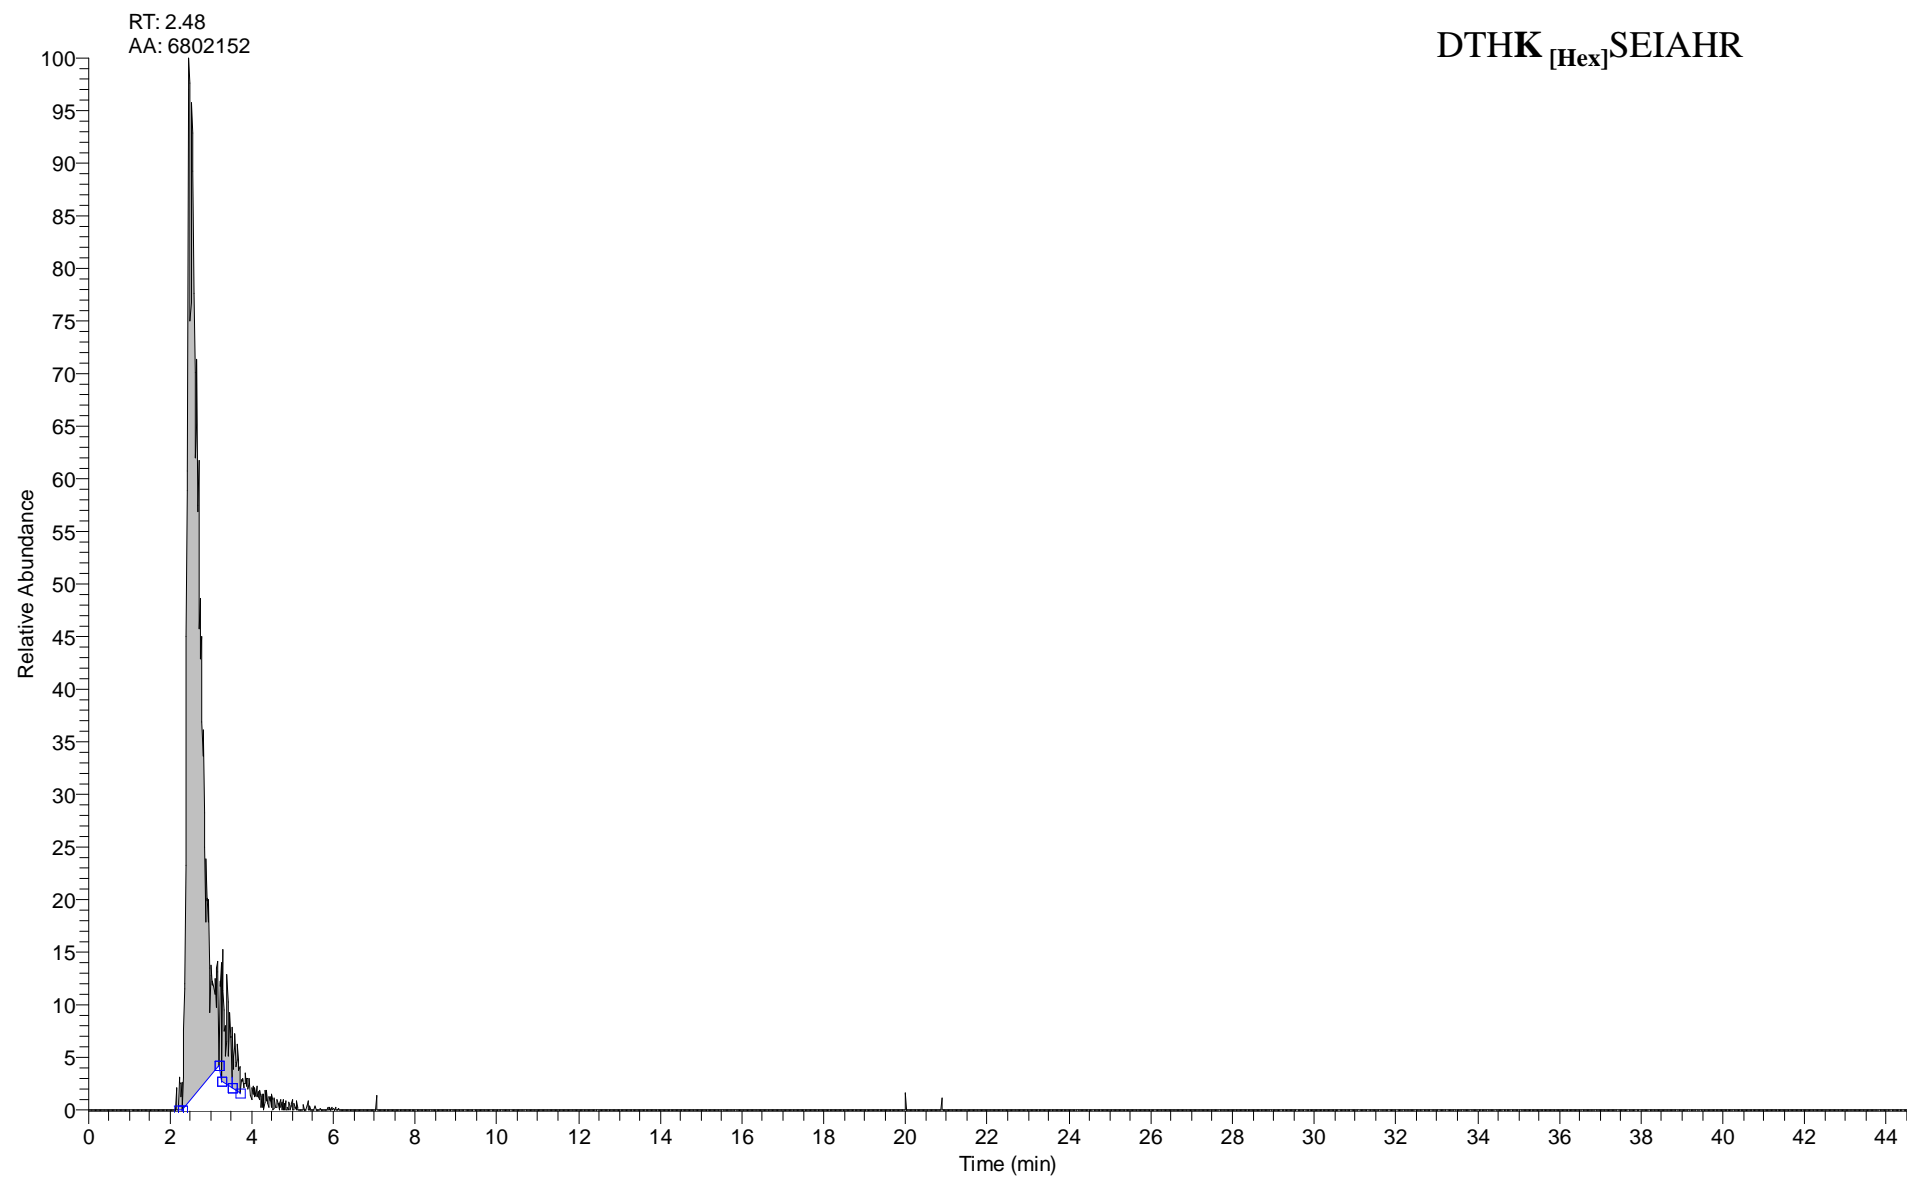

CCTK<sub>[Hex]</sub>PESER

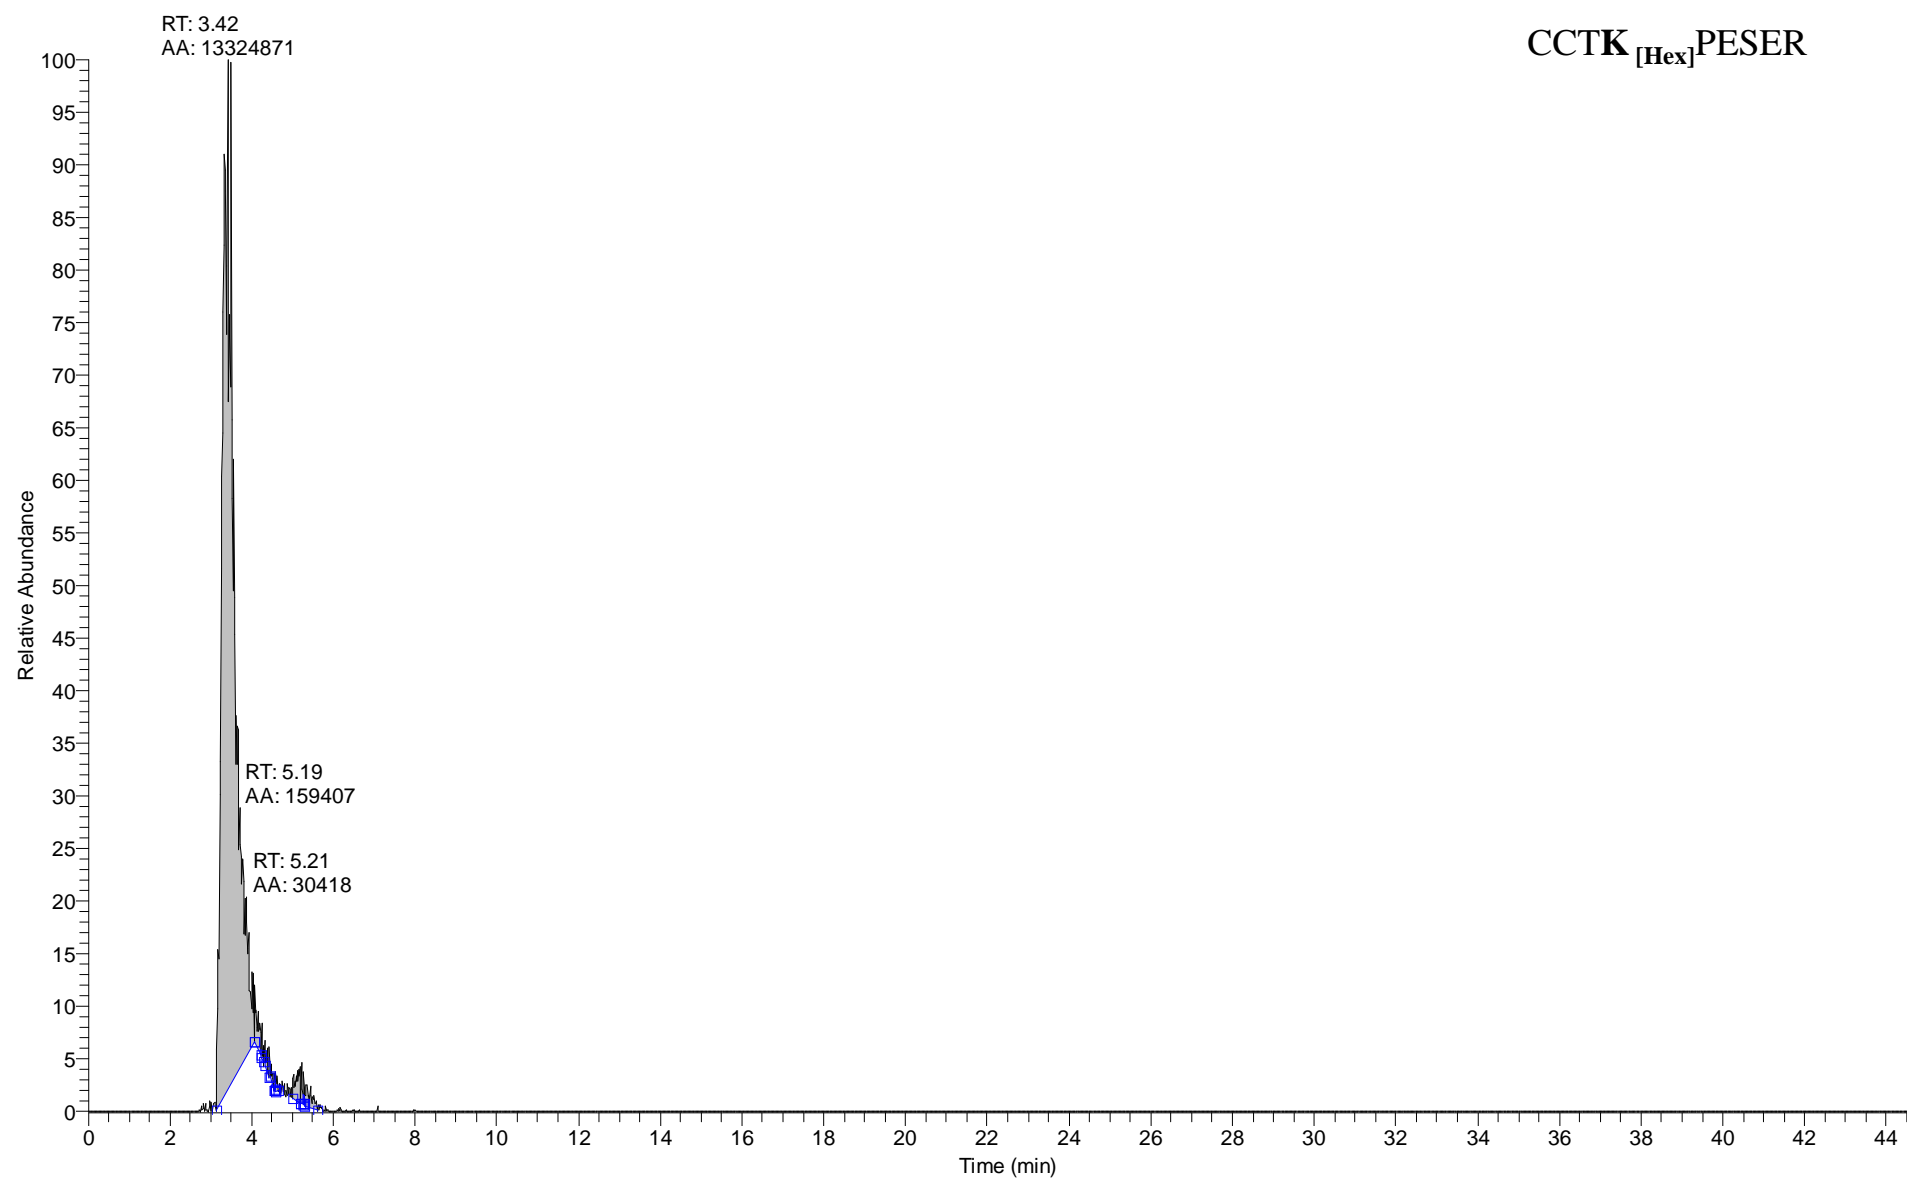

Supplement: c5ra01723h1.pdf [file c5ra01723h1.pdf]
